# Supplementary material for: First Genomic Analysis of Dendritic Cells from Lung and Draining Lymph Nodes in Murine Asthma
Source: Hindawi journal article supplement (doi:10.1155/2015/638032), 2015-01-01
Supplement: f1 [file 638032.f1.zip]

| KEGG Pathway              | KEGG pathway ID | Total number of genes in category | Number of genes found | % genes found | Bonferroni corrected term-enrichment p value |
|---------------------------|-----------------|-----------------------------------|-----------------------|---------------|----------------------------------------------|
| no significant enrichment | -               | -                                 | -                     | -             | -                                            |

| Cellular component                           | GO ID | Total number of genes in category | Number of genes found | % genes found | Bonferroni corrected term-enrichment p value |
|----------------------------------------------|-------|-----------------------------------|-----------------------|---------------|----------------------------------------------|
| intracellular                                | 5622  | 5869                              | 239                   | 4.1           | 5.0E-11                                      |
| intracellular part                           | 44424 | 5799                              | 236                   | 4.1           | 1.0E-10                                      |
| intracellular organelle                      | 43229 | 4906                              | 205                   | 4.2           | 2.2E-09                                      |
| intracellular membrane-bounded organelle     | 43231 | 4389                              | 174                   | 4.0           | 2.4E-05                                      |
| intracellular organelle part                 | 44446 | 2247                              | 103                   | 4.6           | 4.3E-05                                      |
| cytoplasm                                    | 5737  | 4078                              | 162                   | 4.0           | 8.2E-05                                      |
| nucleus                                      | 5634  | 2346                              | 104                   | 4.4           | 1.8E-04                                      |
| cytoplasmic part                             | 44444 | 3065                              | 127                   | 4.1           | 3.2E-04                                      |
| intracellular non-membrane-bounded organelle | 43232 | 1127                              | 58                    | 5.1           | 8.6E-04                                      |
| Z disc                                       | 30018 | 54                                | 8                     | 14.8          | 1.2E-02                                      |
| I band                                       | 31674 | 61                                | 8                     | 13.1          | 2.8E-02                                      |
| cell cortex                                  | 5938  | 99                                | 10                    | 10.1          | 4.6E-02                                      |

| Biological process                        | GO ID | Total number of genes in category | Number of genes found | % genes found | Bonferroni corrected term-enrichment p value |
|-------------------------------------------|-------|-----------------------------------|-----------------------|---------------|----------------------------------------------|
| negative regulation of biological process | 48519 | 1930                              | 102                   | 5.3           | 1.7E-06                                      |
| negative regulation of cellular process   | 48523 | 1760                              | 91                    | 5.2           | 4.4E-05                                      |
| cellular macromolecule metabolic process  | 44260 | 3017                              | 131                   | 4.3           | 9.3E-04                                      |
| regulation of metabolic process           | 19222 | 2469                              | 112                   | 4.5           | 9.3E-04                                      |

|                                               |       |      |     |     |         |
|-----------------------------------------------|-------|------|-----|-----|---------|
| regulation of macromolecule metabolic process | 60255 | 2113 | 99  | 4.7 | 1.1E-03 |
| regulation of developmental process           | 50793 | 1017 | 57  | 5.6 | 1.6E-03 |
| positive regulation of biological process     | 48518 | 2158 | 100 | 4.6 | 1.6E-03 |
| regulation of cell differentiation            | 45595 | 718  | 42  | 5.8 | 1.3E-02 |
| regulation of primary metabolic process       | 80090 | 2137 | 95  | 4.4 | 1.7E-02 |
| protein metabolic process                     | 19538 | 1846 | 84  | 4.6 | 2.4E-02 |
| cellular protein metabolic process            | 44267 | 1565 | 73  | 4.7 | 3.9E-02 |
| cellular protein modification process         | 6464  | 1353 | 65  | 4.8 | 4.4E-02 |
| protein modification process                  | 36211 | 1353 | 65  | 4.8 | 4.4E-02 |

| <b>Moecular function</b>  | <b>GO ID</b> | <b>Total number<br/>of genes in<br/>category</b> | <b>Number of<br/>genes found</b> | <b>% genes<br/>found</b> | <b>Bonferroni<br/>corrected term-<br/>enrichment<br/>p value</b> |
|---------------------------|--------------|--------------------------------------------------|----------------------------------|--------------------------|------------------------------------------------------------------|
| no significant enrichment | -            | -                                                | -                                | -                        | -                                                                |
