# Supplementary material for: First Genomic Analysis of Dendritic Cells from Lung and Draining Lymph Nodes in Murine Asthma
Source: Int J Genomics. 2015 Feb 24;2015:638032. doi: 10.1155/2015/638032 (PMC4355561; doi:10.1155/2015/638032)
Supplement: Supplementary file 1 — Supplemental table 1: List of 1607 differentially regulated genes in CD8- lung DCs. Supplemental table 2: List of 171 differentially regulated genes in CD8+ lung DCs. Supplemental table 3: List of 726 differentially regulated genes in total lymph node DCs. Supplemental table 4: KEGG pathway and gene ontology analysis of differentially regulated genes in CD8- lung DCs. Supplemental table 5: KEGG pathway and gene ontology analysis of differentially regulated genes in CD8+ lung DCs. Supplemental table 6: KEGG pathway and gene ontology analysis of differentially regulated genes in total lymph node DCs. [file 638032.f1.zip]

Archive with 3 entries (2 files):
- 638032.f1/
- 638032.f1/mat.638032.v1.pdf
- 638032.f1/mat.638032.v2.xlsx
