# Supplementary material for: First Genomic Analysis of Dendritic Cells from Lung and Draining Lymph Nodes in Murine Asthma
Source: Int J Genomics. 2015 Feb 24;2015:638032. doi: 10.1155/2015/638032 (PMC4355561; doi:10.1155/2015/638032)
Supplement: Supplementary file 1 — Supplemental table 1: List of 1607 differentially regulated genes in CD8- lung DCs. Supplemental table 2: List of 171 differentially regulated genes in CD8+ lung DCs. Supplemental table 3: List of 726 differentially regulated genes in total lymph node DCs. Supplemental table 4: KEGG pathway and gene ontology analysis of differentially regulated genes in CD8- lung DCs. Supplemental table 5: KEGG pathway and gene ontology analysis of differentially regulated genes in CD8+ lung DCs. Supplemental table 6: KEGG pathway and gene ontology analysis of differentially regulated genes in total lymph node DCs. [file 638032.f1.zip › 638032.f1/mat.638032.v2.xlsx]

## Sheet: Suppl. Table 1
Annotation		Normalized log2 signal intensities				Fold change	Cluster information	Gene description
ProbeName	GeneSymbol	Contr CD8- lung DC	Asthma CD8- lung DC	Contr CD8+ lung DC	Asthma CD8+ lung DC	Asthma CD8- lung DC vs. Contr CD8- lung DC Total: 1607 (up: 871, down: 736)	K-means cluster #	Description
1438431_at	Abcd2	5.6256	9.38671	5.95518	5.40569	13.5583	Cluster 1	ATP-binding cassette, sub-family D (ALD), member 2
1432198_at		6.20715	9.69177	6.3481	5.95017	11.1938	Cluster 1	---
1417556_at	Fabp1	8.24808	11.6338	8.10474	7.42776	10.4523	Cluster 1	fatty acid binding protein 1, liver
1437085_at	D630039A03Rik	7.35325	10.7382	7.62401	7.12633	10.4463	Cluster 1	RIKEN cDNA D630039A03 gene
1416645_a_at	Afp	5.14989	8.52612	5.00888	4.74573	10.3835	Cluster 1	alpha fetoprotein
1422648_at	Slc7a2	6.91003	10.266	7.525	6.62144	10.2389	Cluster 1	solute carrier family 7 (cationic amino acid transporter, y+ system), member 2
1419748_at	Abcd2	7.69996	11.0452	8.0648	7.31249	10.1632	Cluster 1	ATP-binding cassette, sub-family D (ALD), member 2
1426008_a_at	Slc7a2	5.59155	8.89432	5.87804	5.61347	9.86813	Cluster 1	solute carrier family 7 (cationic amino acid transporter, y+ system), member 2
1439764_s_at	Igf2bp2	5.64541	8.90068	5.62131	5.37194	9.54848	Cluster 1	insulin-like growth factor 2 mRNA binding protein 2
1447831_s_at	Mtmr7	8.08351	11.2237	8.12791	7.43881	8.81657	Cluster 1	myotubularin related protein 7
1448470_at	Fbp1	4.90179	7.91263	5.46452	5.08541	8.06036	Cluster 1	fructose bisphosphatase 1
1448949_at	Car4	7.98376	10.9751	7.96781	6.71768	7.95193	Cluster 1	carbonic anhydrase 4
1419442_at	Matn2	5.85709	8.83238	5.58175	5.18942	7.86411	Cluster 1	matrilin 2
1448764_a_at	Fabp1	10.363	13.3117	10.5148	9.18475	7.72077	Cluster 1	fatty acid binding protein 1, liver
1436555_at	Slc7a2	9.30921	12.2492	9.7322	8.88163	7.67409	Cluster 1	solute carrier family 7 (cationic amino acid transporter, y+ system), member 2
1418094_s_at	Car4	8.62492	11.4981	8.22902	7.42896	7.32665	Cluster 1	carbonic anhydrase 4
1428663_at	Sgms2	5.97968	8.85033	6.05851	5.76538	7.31393	Cluster 1	sphingomyelin synthase 2
1419534_at	Olr1	8.39852	11.2665	8.55294	8.18464	7.3002	Cluster 1	oxidized low density lipoprotein (lectin-like) receptor 1
1418797_at	Ms4a8a	9.35764	12.2235	9.2416	8.25533	7.28954	Cluster 1	membrane-spanning 4-domains, subfamily A, member 8A
1417150_at	Slc6a4	7.19195	10.0496	6.71314	5.98217	7.24848	Cluster 1	solute carrier family 6 (neurotransmitter transporter, serotonin), member 4
1442368_at	Kctd12b	5.66426	8.50188	5.68803	5.21613	7.1484	Cluster 1	potassium channel tetramerisation domain containing 12b
1435513_at	Htr2c	5.92857	8.76008	5.87275	4.74252	7.1182	Cluster 1	5-hydroxytryptamine (serotonin) receptor 2C
1452260_at	Cidec	8.0385	10.8668	7.30997	6.17418	7.10253	Cluster 1	cell death-inducing DFFA-like effector c
1452065_at	Vstm2a	5.37706	8.20523	4.86257	4.52138	7.10172	Cluster 1	V-set and transmembrane domain containing 2A
1426785_s_at	Mgll	7.81229	10.6285	7.50284	6.77479	7.04293	Cluster 1	monoglyceride lipase
1456980_at	Rab44	7.69075	10.5039	7.54693	7.01784	7.02795	Cluster 1	RAB44, member RAS oncogene family
1440285_at	Ppp1r9a	6.14712	8.89735	6.55576	5.82034	6.72824	Cluster 1	protein phosphatase 1, regulatory (inhibitor) subunit 9A
1419321_at	F7	9.58655	12.3344	10.3219	9.58199	6.71723	Cluster 1	coagulation factor VII
1426657_s_at	EG666036 /// EG666422 /// EG666875 /// EG668576 /// Phgdh	7.45637	10.2033	7.53961	7.18131	6.71283	Cluster 1	3-phosphoglycerate dehydrogenase pseudogene /// 3-phosphoglycerate dehydrogenase
1434109_at	Sh3bgrl2	6.00852	8.7385	5.66556	5.10638	6.63449	Cluster 1	SH3 domain binding glutamic acid-rich protein like 2
1424186_at	Ccdc80	7.74667	10.4063	7.8803	7.22187	6.31862	Cluster 1	coiled-coil domain containing 80
1434326_x_at	Coro2b	5.38978	8.03769	4.89607	4.98294	6.26758	Cluster 1	coronin, actin binding protein, 2B
1429166_s_at	Clmn	6.33725	8.97682	5.56977	5.12682	6.23147	Cluster 1	calmin
1454799_at	Agpat9	6.04564	8.65671	5.8847	5.1838	6.10958	Cluster 1	1-acylglycerol-3-phosphate O-acyltransferase 9
1442166_at	Cpne5	8.49831	11.0977	8.21359	7.83343	6.06051	Cluster 1	copine V
1427025_at	Mtmr7	7.23189	9.81086	7.15583	6.90725	5.97515	Cluster 1	myotubularin related protein 7
1428808_at	Prickle2	6.04802	8.62255	5.6181	5.2418	5.95678	Cluster 1	prickle homolog 2 (Drosophila)
1420715_a_at	Pparg	8.84098	11.4039	8.50238	8.02224	5.90887	Cluster 1	peroxisome proliferator activated receptor gamma
1434645_at	C530008M17Rik	6.98276	9.5276	5.98771	5.03641	5.83544	Cluster 1	RIKEN cDNA C530008M17 gene
1418172_at	Hebp1	9.20871	11.752	9.17824	8.8664	5.82906	Cluster 1	heme binding protein 1
1424451_at	Acaa1b	10.6173	13.1587	10.0163	8.65975	5.82141	Cluster 1	acetyl-Coenzyme A acyltransferase 1B
1436200_at	Lonrf3	7.08702	9.62602	6.68307	6.86056	5.81185	Cluster 1	LON peptidase N-terminal domain and ring finger 3
1419123_a_at	Pdgfc	7.57736	10.1136	7.89492	6.80658	5.80055	Cluster 1	platelet-derived growth factor, C polypeptide
1419700_a_at	Prom1	7.28157	9.81352	6.52359	5.60497	5.78354	Cluster 1	prominin 1
1439045_x_at	Tc2n	4.98145	7.50599	4.56022	4.28955	5.75393	Cluster 1	tandem C2 domains, nuclear
1450391_a_at	Mgll	7.51487	10.0393	7.2049	6.62109	5.75351	Cluster 1	monoglyceride lipase
1455978_a_at	Matn2	6.36431	8.87728	5.87319	5.49863	5.70795	Cluster 1	matrilin 2
1443163_at	Slc39a2	7.39017	9.9031	6.89299	5.45519	5.70777	Cluster 1	solute carrier family 39 (zinc transporter), member 2
1437621_x_at	EG665516 /// EG666036 /// EG668771 /// Phgdh	9.10927	11.591	9.19117	9.03741	5.58576	Cluster 1	3-phosphoglycerate dehydrogenase
1456812_at	Abcd2	6.77031	9.24878	7.03932	6.60128	5.57305	Cluster 1	ATP-binding cassette, sub-family D (ALD), member 2
1456072_at	Ppp1r9a	5.55003	8.0179	5.75199	5.22595	5.53227	Cluster 1	protein phosphatase 1, regulatory (inhibitor) subunit 9A
1450703_at	Slc7a2	5.06411	7.52838	5.21767	5.18808	5.5185	Cluster 1	solute carrier family 7 (cationic amino acid transporter, y+ system), member 2
1440339_at	Enpp1	5.8117	8.27175	5.53948	5.38459	5.50238	Cluster 1	ectonucleotide pyrophosphatase/phosphodiesterase 1
1417023_a_at	Fabp4	8.23841	10.6905	8.38722	8.28243	5.47197	Cluster 1	fatty acid binding protein 4, adipocyte
1428700_at	P2ry13	8.03121	10.4752	8.2541	7.23272	5.44134	Cluster 1	purinergic receptor P2Y, G-protein coupled 13
1451263_a_at	Fabp4	7.8642	10.3059	8.14311	8.07484	5.43272	Cluster 1	fatty acid binding protein 4, adipocyte
1443933_at	Tc2n	5.38775	7.82766	5.02404	4.82701	5.42609	Cluster 1	tandem C2 domains, nuclear
1436528_at	Kazald1	8.00741	10.4157	7.43854	6.9185	5.30828	Cluster 1	Kazal-type serine peptidase inhibitor domain 1
1448873_at	Ocln	5.14203	7.55024	5.198	4.9739	5.30814	Cluster 1	occludin
1423704_at	Pla2g15	9.42842	11.8217	9.73346	8.87339	5.25348	Cluster 1	phospholipase A2, group XV
1428822_a_at	Snx24	8.64064	11.0311	8.89331	8.86118	5.24319	Cluster 1	sorting nexing 24
1417946_at	Abhd3	5.83445	8.20835	5.1422	4.7684	5.1834	Cluster 1	abhydrolase domain containing 3
1415897_a_at	Mgst1	10.4344	12.8068	10.2237	10.0146	5.17812	Cluster 1	microsomal glutathione S-transferase 1
1418345_at	Tnfsf12 /// Tnfsf12-tnfsf13 /// Tnfsf13	9.72969	12.0945	9.90741	9.50992	5.15094	Cluster 1	cDNA sequence BC096441 /// tumor necrosis factor (ligand) superfamily, member 13
1454714_x_at	EG665516 /// EG666036 /// EG668771 /// Phgdh	9.2041	11.5585	9.39486	9.08808	5.11395	Cluster 1	3-phosphoglycerate dehydrogenase
1416271_at	Perp	9.94612	12.2983	8.84813	7.75554	5.10585	Cluster 1	PERP, TP53 apoptosis effector
1418770_at	Cd2	9.68561	12.0368	9.68947	8.78319	5.10238	Cluster 1	CD2 antigen
1449351_s_at	Pdgfc	7.1543	9.49423	7.72108	7.22889	5.06278	Cluster 1	platelet-derived growth factor, C polypeptide
1419692_a_at	Ltc4s	8.13948	10.4699	8.01236	7.45434	5.02952	Cluster 1	leukotriene C4 synthase
1416414_at	Emilin1	7.20853	9.52806	7.65678	7.21403	4.99171	Cluster 1	elastin microfibril interfacer 1
1437540_at	Mcoln3	8.35675	10.6415	7.52492	6.54889	4.87266	Cluster 1	mucolipin 3
1419537_at	Tcfec	7.67417	9.95709	7.92643	7.20097	4.86661	Cluster 1	transcription factor EC
1460668_at	Gal	7.4205	9.69831	7.28664	6.76427	4.84941	Cluster 1	galanin
1421802_at	Ear1	10.2286	12.5043	9.62163	8.43605	4.8424	Cluster 1	eosinophil-associated, ribonuclease A family, member 1
1416013_at	Pld3	9.98395	12.2594	10.0973	9.71463	4.84163	Cluster 1	phospholipase D family, member 3
1434582_at	Erc2	5.19609	7.46788	5.2921	4.75951	4.82921	Cluster 1	ELKS/RAB6-interacting/CAST family member 2
1422725_at	Mak	6.6652	8.93622	6.19083	5.88552	4.82663	Cluster 1	male germ cell-associated kinase
1450808_at	Fpr1	9.70378	11.9524	8.75278	7.69295	4.75237	Cluster 1	formyl peptide receptor 1
1428749_at	Dmxl2	10.1228	12.371	9.79509	8.77101	4.7508	Cluster 1	Dmx-like 2
1431056_a_at	Lpl	9.80243	12.0437	10.1959	9.89203	4.72828	Cluster 1	lipoprotein lipase
1456156_at	Lepr	5.98513	8.22547	5.0744	4.53193	4.72509	Cluster 1	leptin receptor
1433933_s_at	Slco2b1	8.60541	10.8424	8.86523	7.76735	4.71398	Cluster 1	solute carrier organic anion transporter family, member 2b1
1423362_at	Sort1	10.0325	12.2613	9.62211	9.04637	4.68735	Cluster 1	sortilin 1
1427352_at	Krt79	10.8358	13.0645	10.1949	9.08565	4.68689	Cluster 1	keratin 79
1435313_at	Cd200r4	9.13962	11.3546	8.60252	8.1202	4.6428	Cluster 1	CD200 receptor 4
1448377_at	Slpi	9.72325	11.938	9.28395	8.77701	4.64215	Cluster 1	secretory leukocyte peptidase inhibitor
1418983_at	Inadl	7.54942	9.74892	6.51359	6.05563	4.59319	Cluster 1	InaD-like (Drosophila)
1420657_at	Ucp3	6.36685	8.56607	6.23855	6.27663	4.5923	Cluster 1	uncoupling protein 3 (mitochondrial, proton carrier)
1449498_at	Marco	10.0435	12.2368	9.24794	8.4188	4.57341	Cluster 1	macrophage receptor with collagenous structure
1424123_at	Mfsd7c	7.95434	10.1465	7.25635	6.80154	4.57001	Cluster 1	major facilitator superfamily domain containing 7C
1449065_at	Acot1 /// LOC100044830	6.94097	9.12929	6.48074	6.10063	4.55775	Cluster 1	acyl-CoA thioesterase 1
1422869_at	Mertk	9.18688	11.3713	9.27997	9.10416	4.54532	Cluster 1	c-mer proto-oncogene tyrosine kinase
1448382_at	Ehhadh	6.40247	8.5866	6.38425	6.11818	4.54451	Cluster 1	enoyl-Coenzyme A, hydratase/3-hydroxyacyl Coenzyme A dehydrogenase
1456471_x_at	EG385344 /// EG627427 /// EG665516 /// EG666036 /// EG666422 /// EG666875 /// EG668506 /// EG668576 /// EG668771 /// LOC630761 /// LOC630896 /// OTTMUSG00000011498 /// Phgdh	8.48854	10.6659	8.6197	8.60402	4.52338	Cluster 1	3-phosphoglycerate dehydrogenase pseudogene /// 3-phosphoglycerate dehydrogenase
1444176_at	Atp6v0d2	10.8864	13.0611	10.6365	9.52479	4.51496	Cluster 1	ATPase, H+ transporting, lysosomal V0 subunit D2
1448301_s_at	Serpinb1a	6.30985	8.48378	6.74234	6.09017	4.5125	Cluster 1	serine (or cysteine) peptidase inhibitor, clade B, member 1a
1416273_at	Tnfaip2	8.87714	11.0468	8.86819	7.96993	4.49931	Cluster 1	tumor necrosis factor, alpha-induced protein 2
1436368_at	Slc16a10	7.55138	9.71727	7.23764	7.1991	4.48742	Cluster 1	solute carrier family 16 (monocarboxylic acid transporters), member 10
1434451_at	ENSMUSG00000074917	7.96439	10.1302	8.04036	6.87194	4.48728	Cluster 1	predicted gene 10786
1435135_at	Aadacl1	10.1088	12.2739	9.57565	9.69575	4.48483	Cluster 1	arylacetamide deacetylase-like 1
1439117_at	Clmn	6.34491	8.50837	5.66231	5.57331	4.47989	Cluster 1	calmin
1428628_at	1190002A17Rik	6.54342	8.69756	6.64386	6.11498	4.45104	Cluster 1	RIKEN cDNA 1190002A17 gene
1419300_at	Flt1	6.86934	9.02345	7.35184	6.71073	4.45095	Cluster 1	FMS-like tyrosine kinase 1
1441880_x_at	Tmem149	8.30707	10.4508	8.0565	7.92872	4.41902	Cluster 1	transmembrane protein 149
1435389_at	Reps2	6.74819	8.88851	6.52105	5.76788	4.40859	Cluster 1	RALBP1 associated Eps domain containing protein 2
1427994_at	Cd300lf /// LOC100047115	9.41146	11.5441	9.84843	9.48931	4.38519	Cluster 1	CD300 antigen like family member F
1442434_at	D8Ertd82e	8.09793	10.2218	8.10136	7.71861	4.35861	Cluster 1	DNA segment, Chr 8, ERATO Doi 82, expressed
1438530_at	Tfpi	4.84123	6.96468	4.95573	4.60612	4.35735	Cluster 1	tissue factor pathway inhibitor
1450138_a_at	Serpinb6a	9.81805	11.9324	9.9255	9.2123	4.32993	Cluster 1	serine (or cysteine) peptidase inhibitor, clade B, member 6a
1426658_x_at	Phgdh	9.42277	11.5336	9.47949	9.23687	4.31952	Cluster 1	3-phosphoglycerate dehydrogenase
1440355_at	Kctd12b	7.13227	9.24248	7.08621	6.03255	4.31755	Cluster 1	potassium channel tetramerisation domain containing 12b
1417156_at	Krt19	9.88735	11.9928	8.63875	7.71957	4.30323	Cluster 1	keratin 19
1435134_at	Aadacl1	7.486	9.57557	7.19087	6.99792	4.25621	Cluster 1	arylacetamide deacetylase-like 1
1434798_at	Atp6v0d2	10.2989	12.3884	9.94949	9.16427	4.25608	Cluster 1	ATPase, H+ transporting, lysosomal V0 subunit D2
1450430_at	Mrc1	11.4061	13.4874	12.1306	11.3274	4.23164	Cluster 1	mannose receptor, C type 1
1422642_at	Cdc42ep3	8.50422	10.5842	8.73426	8.46592	4.22795	Cluster 1	CDC42 effector protein (Rho GTPase binding) 3
1428667_at	Maoa	7.41555	9.48919	7.44387	7.09691	4.20946	Cluster 1	monoamine oxidase A
1417741_at	Pygl	10.0816	12.1514	10.23	9.82727	4.19805	Cluster 1	liver glycogen phosphorylase
1455227_at	Aadacl1	9.80028	11.8626	9.81788	8.50879	4.17662	Cluster 1	arylacetamide deacetylase-like 1
1417818_at	Wwtr1	7.07268	9.13061	6.52755	5.89288	4.16389	Cluster 1	WW domain containing transcription regulator 1
1448530_at	Gmpr /// LOC100045393	7.73321	9.7907	7.51231	7.10178	4.1626	Cluster 1	guanosine monophosphate reductase
1424842_a_at	Arhgap24	6.05891	8.11098	5.8845	5.57004	4.14702	Cluster 1	Rho GTPase activating protein 24
1454254_s_at	1600029D21Rik	9.40376	11.4516	9.22859	9.35799	4.13498	Cluster 1	RIKEN cDNA 1600029D21 gene
1427327_at	Pilra	8.88837	10.936	9.30608	8.94016	4.13425	Cluster 1	paired immunoglobin-like type 2 receptor alpha
1421385_a_at	Myo7a	8.19932	10.2434	8.268	8.03233	4.12404	Cluster 1	myosin VIIA
1416416_x_at	Gstm1	8.61667	10.6341	8.48384	8.15737	4.0485	Cluster 1	glutathione S-transferase, mu 1
1419721_at	Niacr1	7.1119	9.12391	7.33147	6.96625	4.03344	Cluster 1	niacin receptor 1
1416318_at	Serpinb1a	10.0357	12.0368	10.5006	9.67689	4.00295	Cluster 1	serine (or cysteine) peptidase inhibitor, clade B, member 1a
1423363_at	Sort1	6.68405	8.66553	6.50622	6.3355	3.94897	Cluster 1	sortilin 1
1424887_at	Klhdc4	9.61944	11.5995	9.45583	9.14244	3.94513	Cluster 1	kelch domain containing 4
1427982_s_at	Syne2	5.90482	7.87851	5.25842	5.62683	3.92771	Cluster 1	synaptic nuclear envelope 2
1425225_at	Fcgr4	8.33685	10.3013	8.82612	7.80233	3.90273	Cluster 1	Fc receptor, IgG, low affinity IV
1430520_at	Cpne8	7.43312	9.379	7.05068	7.09938	3.85271	Cluster 1	copine VIII
1419149_at	Serpine1	6.64126	8.58384	6.22258	5.73822	3.84392	Cluster 1	serine (or cysteine) peptidase inhibitor, clade E, member 1
1424975_at	Siglec5	9.7158	11.6577	8.81774	7.96598	3.84199	Cluster 1	sialic acid binding Ig-like lectin 5
1455342_at	A230083H22Rik	7.22035	9.1613	7.13882	6.94322	3.83958	Cluster 1	prune homolog 2 (Drosophila)
1450700_at	Cdc42ep3	10.1611	12.1015	10.2876	9.80334	3.83802	Cluster 1	CDC42 effector protein (Rho GTPase binding) 3
1419298_at	Pon3	7.73982	9.67734	7.50246	7.4885	3.83047	Cluster 1	paraoxonase 3
1417565_at	Abhd5	8.63355	10.5632	8.4839	8.45427	3.80963	Cluster 1	abhydrolase domain containing 5
1422953_at	Fpr2	10.9602	12.8849	10.0648	8.56643	3.79641	Cluster 1	formyl peptide receptor 2
1436520_at	Ahnak2	7.86687	9.78987	7.36711	7.3283	3.79212	Cluster 1	AHNAK nucleoprotein 2
1448665_at	Dmd	4.77859	6.69961	4.74113	4.54164	3.7869	Cluster 1	dystrophin, muscular dystrophy
1449454_at	Bst1	7.46782	9.3879	6.97456	6.10555	3.78443	Cluster 1	bone marrow stromal cell antigen 1
1436879_x_at	Afp	5.35482	7.27477	5.18325	4.89935	3.78409	Cluster 1	alpha fetoprotein
1424191_a_at	Tmem41a	8.41303	10.3309	8.27203	8.38327	3.7787	Cluster 1	transmembrane protein 41a
1418701_at	Comt1	7.57335	9.48985	7.86326	7.61784	3.77508	Cluster 1	catechol-O-methyltransferase 1
1425837_a_at	Ccrn4l /// LOC100047134	8.81207	10.7274	8.9773	8.94007	3.77189	Cluster 1	CCR4 carbon catabolite repression 4-like (S. cerevisiae)
1452013_at	Atp10a	6.18528	8.09933	6.18303	5.56782	3.76867	Cluster 1	ATPase, class V, type 10A
1451326_at	Abhd14b	7.32079	9.2345	7.57067	7.42138	3.76776	Cluster 1	abhydrolase domain containing 14b
1424981_at	Nln	6.36946	8.28029	6.4507	6.41907	3.76027	Cluster 1	neurolysin (metallopeptidase M3 family)
1421304_at	Klra2	6.36706	8.2777	6.42434	5.58081	3.75977	Cluster 1	killer cell lectin-like receptor, subfamily A, member 2
1417507_at	Cyb561	8.47373	10.3806	7.7643	7.15812	3.75006	Cluster 1	cytochrome b-561
1450955_s_at	Sort1	6.97306	8.87312	6.79937	6.46731	3.73228	Cluster 1	sortilin 1
1425321_a_at	Clmn	4.88812	6.78454	5.06889	4.99387	3.72288	Cluster 1	calmin
1438855_x_at	Tnfaip2	11.0138	12.9057	10.8573	10.0088	3.71131	Cluster 1	tumor necrosis factor, alpha-induced protein 2
1417130_s_at	Angptl4	8.62012	10.5039	8.10807	7.4756	3.69029	Cluster 1	angiopoietin-like 4
1447851_x_at	Atp10a	9.05228	10.9356	8.62023	7.89379	3.68913	Cluster 1	ATPase, class V, type 10A
1417694_at	Gab1	5.84891	7.72783	6.15636	5.56656	3.67801	Cluster 1	growth factor receptor bound protein 2-associated protein 1
1421960_at	Adcy3	8.65635	10.5327	7.84781	7.43833	3.67141	Cluster 1	adenylate cyclase 3
1434402_at	Samd8	7.92603	9.80015	8.19958	7.93576	3.66578	Cluster 1	sterile alpha motif domain containing 8
1424162_at	Trim29	6.80993	8.68402	6.78231	6.08284	3.6657	Cluster 1	tripartite motif-containing 29
1426217_at	Tmem216	6.73545	8.60797	6.6446	6.47138	3.66169	Cluster 1	transmembrane protein 216
1435283_s_at	Gm967	7.34936	9.2216	6.93277	6.78303	3.661	Cluster 1	family with sequence similarity 189, member A2
1458683_at	Sirpb1	10.4109	12.2793	10.4958	10.4786	3.65139	Cluster 1	signal-regulatory protein beta 1A
1451322_at	Cmbl	6.3	8.1574	5.66651	5.06389	3.62352	Cluster 1	carboxymethylenebutenolidase-like (Pseudomonas)
1448330_at	Gstm1	7.77956	9.63178	7.60732	7.29512	3.61053	Cluster 1	glutathione S-transferase, mu 1
1417566_at	Abhd5	8.48174	10.3227	8.31888	8.42527	3.58243	Cluster 1	abhydrolase domain containing 5
1417604_at	Camk1	7.72371	9.56018	7.42732	7.49259	3.57135	Cluster 1	calcium/calmodulin-dependent protein kinase I
1437424_at	Syde2	6.16484	7.99984	6.14028	6.3632	3.56772	Cluster 1	synapse defective 1, Rho GTPase, homolog 2 (C. elegans)
1455221_at	Abcg1	9.15605	10.989	8.8759	8.23472	3.56258	Cluster 1	ATP-binding cassette, sub-family G (WHITE), member 1
1437245_at	Tmem154	6.93295	8.76493	6.61814	6.11424	3.56026	Cluster 1	transmembrane protein 154
1429428_at	Tcf7l2	7.2535	9.08505	6.96711	6.5679	3.55919	Cluster 1	transcription factor 7-like 2, T-cell specific, HMG-box
1451490_at	Lyplal1	6.31247	8.14049	6.52426	6.39966	3.55051	Cluster 1	lysophospholipase-like 1
1427844_a_at	Cebpb	7.84429	9.66146	7.82174	7.75432	3.5239	Cluster 1	CCAAT/enhancer binding protein (C/EBP), beta
1434786_at	Ppp1r12b	7.01916	8.82831	6.78263	6.32399	3.50435	Cluster 1	protein phosphatase 1, regulatory (inhibitor) subunit 12B
1435363_at	Plekhg1	8.73035	10.5378	8.55854	7.79576	3.5003	Cluster 1	pleckstrin homology domain containing, family G (with RhoGef domain) member 1
1438294_at	Atxn1	6.85318	8.65737	6.84675	6.55582	3.49233	Cluster 1	ataxin 1
1449229_a_at	Cdkl2	6.45128	8.24655	6.25962	5.96569	3.4708	Cluster 1	cyclin-dependent kinase-like 2 (CDC2-related kinase)
1416040_at	Lipf	5.70085	7.48447	5.02327	4.64313	3.44287	Cluster 1	lipase, gastric
1453836_a_at	Mgll	5.92822	7.71179	5.56862	5.5071	3.44276	Cluster 1	monoglyceride lipase
1418288_at	Lpin1	8.69811	10.48	8.61418	8.02146	3.43866	Cluster 1	lipin 1
1431146_a_at	Cpne8	6.26025	8.03783	5.79473	5.40611	3.42851	Cluster 1	copine VIII
1457266_at	Slc38a6	7.86223	9.63601	8.03518	8.01069	3.41948	Cluster 1	solute carrier family 38, member 6
1422852_at	Cib2	7.18592	8.9422	6.64248	6.35963	3.37826	Cluster 1	calcium and integrin binding family member 2
1434129_s_at	Lhfpl2	7.47059	9.21965	7.39181	7.75235	3.3614	Cluster 1	lipoma HMGIC fusion partner-like 2
1441962_at	Alox5	8.88907	10.6306	8.62875	8.18925	3.34393	Cluster 1	arachidonate 5-lipoxygenase
1418984_at	Inadl	8.9349	10.6757	8.06237	7.64505	3.34228	Cluster 1	InaD-like (Drosophila)
1434112_at	LOC100048050 /// Lphn2	7.53306	9.27208	6.67434	6.42276	3.33809	Cluster 1	latrophilin 2
1448919_at	Cd302	10.6858	12.4243	10.2342	9.99188	3.33667	Cluster 1	CD302 antigen
1418901_at	Cebpb	10.5327	12.267	10.6497	10.2123	3.32712	Cluster 1	CCAAT/enhancer binding protein (C/EBP), beta
1455337_at	Fgd4	6.20846	7.94227	6.44044	5.52991	3.32605	Cluster 1	FYVE, RhoGEF and PH domain containing 4
1420959_at	Asph	6.45569	8.18079	6.43458	6.295	3.30604	Cluster 1	aspartate-beta-hydroxylase
1434891_at	Ptgfrn	7.622	9.34615	7.16411	6.60478	3.30386	Cluster 1	prostaglandin F2 receptor negative regulator
1421182_at	Clec1b	8.47861	10.2008	7.66793	6.61744	3.29931	Cluster 1	C-type lectin domain family 1, member b
1451019_at	Ctsf	6.20119	7.92251	6.1606	6.05557	3.29739	Cluster 1	cathepsin F
1423570_at	Abcg1	12.2523	13.9666	12.1907	11.7636	3.28156	Cluster 1	ATP-binding cassette, sub-family G (WHITE), member 1
1447272_s_at	Atp10a	7.61584	9.32877	7.14076	6.58786	3.27825	Cluster 1	ATPase, class V, type 10A
1426015_s_at	Asph	6.86329	8.57585	7.35379	6.62093	3.27743	Cluster 1	aspartate-beta-hydroxylase
1434111_at	LOC100048050 /// Lphn2	8.18887	9.90032	7.20434	6.96057	3.27489	Cluster 1	latrophilin 2
1417605_s_at	Camk1	8.66724	10.3711	8.63812	8.42648	3.2578	Cluster 1	calcium/calmodulin-dependent protein kinase I
1429427_s_at	Tcf7l2	7.22541	8.9283	7.02437	6.35891	3.25552	Cluster 1	transcription factor 7-like 2, T-cell specific, HMG-box
1418672_at	Akr1c13	7.51716	9.21966	7.72686	7.62761	3.25466	Cluster 1	aldo-keto reductase family 1, member C13
1448134_at	X99384	9.27221	10.9746	9.23213	8.68694	3.25437	Cluster 1	cDNA sequence X99384
1436611_at	Slc39a12	4.70364	6.40445	4.80017	4.71665	3.25083	Cluster 1	solute carrier family 39 (zinc transporter), member 12
1450148_at	Mcoln3	5.44417	7.14189	5.21174	4.97951	3.24388	Cluster 1	mucolipin 3
1433906_at	Rlbp1l1	4.91503	6.61201	4.70351	4.89103	3.24221	Cluster 1	clavesin 1
1419627_s_at	Clec4n	11.3337	13.0291	11.6833	11.4575	3.23872	Cluster 1	C-type lectin domain family 4, member n
1422010_at	Tlr7	7.57871	9.27374	7.91175	6.80701	3.23783	Cluster 1	toll-like receptor 7
1441516_a_at	C130050O18Rik	8.06633	9.75129	8.26507	8.17893	3.21532	Cluster 1	RIKEN cDNA C130050O18 gene
1448595_a_at	Bex1	4.56962	6.25254	4.35232	4.72747	3.21078	Cluster 1	brain expressed gene 1
1437864_at	Adipor2	9.57698	11.2551	9.14482	9.34623	3.20011	Cluster 1	adiponectin receptor 2
1433661_at	Nlrx1	8.94295	10.6158	9.0882	8.8297	3.18847	Cluster 1	NLR family member X1
1424769_s_at	Cald1	5.31841	6.98819	5.03381	4.82734	3.18166	Cluster 1	caldesmon 1
1416831_at	Neu1	7.5582	9.22252	7.83807	7.66752	3.16964	Cluster 1	neuraminidase 1
1442590_at	Tnfrsf22 /// Tnfrsf23	7.02844	8.69267	7.00501	6.68672	3.16945	Cluster 1	tumor necrosis factor receptor superfamily, member 22 /// tumor necrosis factor receptor superfamily, member 23
1449183_at	Comt1	9.5103	11.1723	9.70388	9.68907	3.16451	Cluster 1	catechol-O-methyltransferase 1
1423693_at	cela1	6.1164	7.77767	6.27956	6.14673	3.16295	Cluster 1	chymotrypsin-like elastase family, member 1
1421681_at	Nrg4	5.22595	6.88595	5.23432	4.95629	3.16018	Cluster 1	neuregulin 4
1416408_at	Acox1	9.25479	10.9119	9.22477	8.8	3.15375	Cluster 1	acyl-Coenzyme A oxidase 1, palmitoyl
1434211_at	Sh3bgrl2	5.24597	6.89407	5.56707	5.11562	3.1342	Cluster 1	SH3 domain binding glutamic acid-rich protein like 2
1453851_a_at	Gadd45g	9.42636	11.0653	9.39777	9.21946	3.11447	Cluster 1	growth arrest and DNA-damage-inducible 45 gamma
1418888_a_at	Sepx1	8.85914	10.4955	8.81382	8.66649	3.10883	Cluster 1	selenoprotein X 1
1426126_a_at	Tmem149	7.59458	9.22933	7.71488	7.50796	3.10535	Cluster 1	transmembrane protein 149
1437181_at	Peli2	5.74975	7.36948	5.91161	5.4996	3.07318	Cluster 1	pellino 2
1448700_at	G0s2	5.94206	7.56177	5.89374	5.46431	3.07315	Cluster 1	G0/G1 switch gene 2
1452730_at	Rps4y2	7.55607	9.17219	7.59279	7.71363	3.06548	Cluster 1	ribosomal protein S4, Y-linked 2
1425875_a_at	Lepr	6.67577	8.28913	6.62808	6.28796	3.05963	Cluster 1	leptin receptor
1434592_at	Slc16a10	6.7181	8.32542	6.42589	6.37285	3.04686	Cluster 1	solute carrier family 16 (monocarboxylic acid transporters), member 10
1433983_at	Cnksr3	7.7521	9.35941	7.87305	7.88346	3.04683	Cluster 1	Cnksr family member 3
1448118_a_at	Ctsd	11.8939	13.4994	11.7687	11.3306	3.04288	Cluster 1	cathepsin D
1419821_s_at	Idh1	8.13024	9.73145	8.74679	8.03433	3.03397	Cluster 1	isocitrate dehydrogenase 1 (NADP+), soluble
1423420_at	Adrb1	7.91739	9.51851	7.44737	7.10684	3.03378	Cluster 1	adrenergic receptor, beta 1
1419687_at	Macrod1	6.89966	8.49291	7.00294	6.60855	3.01728	Cluster 1	MACRO domain containing 1
1420455_at	Gcm2	4.84646	6.43776	4.87634	4.79912	3.01321	Cluster 1	glial cells missing homolog 2 (Drosophila)
1420808_at	EG627557 /// Ncoa4	10.9974	12.5869	11.2182	11.1888	3.00944	Cluster 1	predicted gene 6768 /// nuclear receptor coactivator 4
1427356_at	Fam89a	7.53641	9.12181	7.65541	7.45406	3.0009	Cluster 1	family with sequence similarity 89, member A
1449453_at	Bst1	9.13449	10.719	8.3331	8.17673	2.99914	Cluster 1	bone marrow stromal cell antigen 1
1451555_at	Nln	8.31525	9.89851	8.21933	8.14304	2.99646	Cluster 1	neurolysin (metallopeptidase M3 family)
1440991_at	Plekhg1	6.19276	7.77189	5.63831	5.50854	2.98791	Cluster 1	pleckstrin homology domain containing, family G (with RhoGef domain) member 1
1449366_at	Mmp8	6.05299	7.63101	6.06913	5.91416	2.98559	Cluster 1	matrix metallopeptidase 8
1416409_at	Acox1	8.26259	9.82526	8.32272	8.24982	2.95399	Cluster 1	acyl-Coenzyme A oxidase 1, palmitoyl
1442957_at	G730013B05Rik	5.2867	6.84771	4.83551	4.77735	2.9506	Cluster 1	RIKEN cDNA G730013B05 gene
1456888_at	Pfkfb4	9.189	10.7436	9.28033	9.0279	2.93747	Cluster 1	6-phosphofructo-2-kinase/fructose-2,6-biphosphatase 4
1428841_at	Best1	7.78546	9.3399	7.5974	7.41224	2.93718	Cluster 1	bestrophin 1
1422412_x_at	Ear3	12.3638	13.9176	12.945	11.9981	2.93584	Cluster 1	eosinophil-associated, ribonuclease A family, member 3
1434158_at	Gmds	8.59052	10.1404	8.47518	8.87733	2.92786	Cluster 1	GDP-mannose 4, 6-dehydratase
1452646_at	Trp53inp2	7.1772	8.72578	7.47598	7.22577	2.92528	Cluster 1	transformation related protein 53 inducible nuclear protein 2
1450006_at	EG627557 /// Ncoa4	8.40377	9.95116	8.49485	8.49807	2.92288	Cluster 1	predicted gene 6768 /// nuclear receptor coactivator 4
1453567_s_at	Tmem216	7.46275	8.99122	7.41155	6.99351	2.8848	Cluster 1	transmembrane protein 216
1460619_at	Mfsd9	5.5961	7.12182	5.69895	5.215	2.87931	Cluster 1	major facilitator superfamily domain containing 9
1451968_at	Xrcc5	5.52324	7.04536	5.24624	5.20382	2.87212	Cluster 1	X-ray repair complementing defective repair in Chinese hamster cells 5
1450478_a_at	Ptpn12	8.50043	10.0137	7.82218	7.99843	2.85451	Cluster 1	protein tyrosine phosphatase, non-receptor type 12
1451782_a_at	Slc29a1	7.75908	9.26156	7.84295	7.80439	2.83329	Cluster 1	solute carrier family 29 (nucleoside transporters), member 1
1436961_at	Hspa12a	5.82938	7.32764	5.71115	5.4537	2.82502	Cluster 1	heat shock protein 12A
1433579_at	Tmem30b	5.19391	6.68905	4.87421	4.63061	2.81892	Cluster 1	transmembrane protein 30B
1438660_at	Gcnt2	8.31491	9.81004	8.21885	8.45552	2.81889	Cluster 1	glucosaminyl (N-acetyl) transferase 2, I-branching enzyme
1434051_s_at	Hspa12a	6.23291	7.72791	6.27844	5.83586	2.81864	Cluster 1	heat shock protein 12A
1447739_x_at	EG384360 /// Klhdc4	7.37552	8.86939	7.23171	7.28336	2.81644	Cluster 1	kelch domain containing 4
1422997_s_at	Acot1 /// Acot2 /// LOC100044830	6.76403	8.25015	6.56911	6.32083	2.80133	Cluster 1	acyl-CoA thioesterase 1 /// acyl-CoA thioesterase 2
1426516_a_at	Lpin1	9.47917	10.9639	9.31372	9.04848	2.79857	Cluster 1	lipin 1
1448300_at	Mgst3	7.64403	9.12832	7.06983	7.53824	2.79779	Cluster 1	microsomal glutathione S-transferase 3
1433843_at	Hs1bp3	7.46527	8.94936	7.7085	7.47682	2.79741	Cluster 1	HCLS1 binding protein 3
1418499_a_at	Kcne3	6.44842	7.92719	5.77079	6.27592	2.7871	Cluster 1	potassium voltage-gated channel, Isk-related subfamily, gene 3
1426246_at	Pros1	9.51485	10.9898	9.217	8.72562	2.77965	Cluster 1	protein S (alpha)
1437155_a_at	Wwtr1	5.86707	7.33964	5.39667	5.54552	2.77517	Cluster 1	WW domain containing transcription regulator 1
1423394_at	Pcyox1	9.19694	10.6659	8.72074	8.70066	2.76827	Cluster 1	prenylcysteine oxidase 1
1445626_at		7.02926	8.49779	7.58539	6.96311	2.7674	Cluster 1	---
1456064_at	AI504432	9.74247	11.203	9.36505	9.30109	2.75218	Cluster 1	expressed sequence AI504432
1433968_a_at	Megf9	6.93464	8.39517	7.10181	6.48961	2.7521	Cluster 1	multiple EGF-like-domains 9
1452521_a_at	Plaur	8.94365	10.4032	8.92818	8.60858	2.75031	Cluster 1	plasminogen activator, urokinase receptor
1452609_at	1190005I06Rik	5.40544	6.85704	5.12062	5.32389	2.73513	Cluster 1	RIKEN cDNA 1190005I06 gene
1423933_a_at	1600029D21Rik	12.3467	13.7947	12.2938	12.2007	2.72828	Cluster 1	RIKEN cDNA 1600029D21 gene
1418976_s_at	Cideb	6.15623	7.60288	6.06147	6.08886	2.72575	Cluster 1	cell death-inducing DNA fragmentation factor, alpha subunit-like effector B
1448390_a_at	Dhrs3	10.0068	11.4528	10.2324	9.84515	2.72457	Cluster 1	dehydrogenase/reductase (SDR family) member 3
1424223_at	1700020C11Rik	6.61845	8.05369	6.68365	6.65587	2.70427	Cluster 1	RIKEN cDNA 1700020C11 gene
1419276_at	Enpp1	7.1244	8.55287	6.62894	6.86848	2.6916	Cluster 1	ectonucleotide pyrophosphatase/phosphodiesterase 1
1429745_at	DXBay18 /// EG434797 /// EG546325 /// EG667413 /// OTTMUSG00000017677	6.23819	7.6663	6.03948	5.71254	2.69094	Cluster 1	DNA segment, Chr X, Baylor 18 /// predicted gene 14685 /// predicted gene 5640 /// predicted gene 5936
1440153_at		6.35198	7.77921	6.42121	6.22242	2.6893	Cluster 1	---
1435043_at	Plcb1	7.75202	9.17921	7.93664	6.74338	2.68923	Cluster 1	phospholipase C, beta 1
1416968_a_at	Hsd3b7	11.3368	12.7601	11.0931	10.8874	2.68197	Cluster 1	hydroxy-delta-5-steroid dehydrogenase, 3 beta- and steroid delta-isomerase 7
1453367_a_at	Abhd12	9.33739	10.7591	8.98149	8.98369	2.67901	Cluster 1	abhydrolase domain containing 12
1415901_at	Plod3	9.40923	10.8295	9.55505	9.50588	2.67629	Cluster 1	procollagen-lysine, 2-oxoglutarate 5-dioxygenase 3
1456480_at	Fry	7.48268	8.8968	7.29887	6.64072	2.66498	Cluster 1	furry homolog (Drosophila)
1459546_s_at	Enpp1	7.6282	9.03265	7.10294	7.20512	2.64717	Cluster 1	ectonucleotide pyrophosphatase/phosphodiesterase 1
1451161_a_at	Emr1	10.5464	11.9483	10.8995	10.1879	2.64244	Cluster 1	EGF-like module containing, mucin-like, hormone receptor-like sequence 1
1419814_s_at	S100a1	9.59219	10.9898	9.16967	8.86821	2.63456	Cluster 1	S100 calcium binding protein A1
1449227_at	Ch25h	8.92182	10.3173	8.72821	8.18371	2.63068	Cluster 1	cholesterol 25-hydroxylase
1426569_a_at	Frk	4.60199	5.99347	4.46408	4.83781	2.62348	Cluster 1	fyn-related kinase
1417768_at	Pnpla8	10.6275	12.0161	10.8855	10.5562	2.61824	Cluster 1	patatin-like phospholipase domain containing 8
1456085_x_at	Cd151	10.0213	11.4073	10.2038	10.0684	2.61344	Cluster 1	CD151 antigen
1434846_at	Dennd4c	8.98673	10.3699	9.33424	8.87915	2.60842	Cluster 1	DENN/MADD domain containing 4C
1430612_at	1810033B17Rik	10.9222	12.3019	10.8787	10.369	2.60226	Cluster 1	RIKEN cDNA 1810033B17 gene
1416946_a_at	Acaa1a /// Acaa1b	9.15603	10.5332	8.94355	9.21163	2.59758	Cluster 1	acetyl-Coenzyme A acyltransferase 1A /// acetyl-Coenzyme A acyltransferase 1B
1438183_x_at	Sord	5.02541	6.40097	5.04911	5.08035	2.5947	Cluster 1	sorbitol dehydrogenase
1453139_at	Nudt12	5.29127	6.66352	4.83957	4.7738	2.58873	Cluster 1	nudix (nucleoside diphosphate linked moiety X)-type motif 12
1451176_at	Mavs	8.49888	9.87046	8.42047	8.47522	2.58753	Cluster 1	mitochondrial antiviral signaling protein
1421410_a_at	Pstpip2	7.7172	9.08558	7.65268	7.54295	2.5818	Cluster 1	proline-serine-threonine phosphatase-interacting protein 2
1433864_at	Lrp12	7.74575	9.11029	7.27765	7.21599	2.57494	Cluster 1	low density lipoprotein-related protein 12
1442827_at	Tlr4	5.18884	6.55333	5.26481	4.92497	2.57485	Cluster 1	toll-like receptor 4
1434446_at	Insr	8.02507	9.38871	8.04601	7.23063	2.57334	Cluster 1	insulin receptor
1450919_at	Mpp1	10.0966	11.4559	10.0753	9.70776	2.56561	Cluster 1	membrane protein, palmitoylated
1426950_at	Parp16	5.58473	6.94145	5.64774	5.55005	2.56104	Cluster 1	poly (ADP-ribose) polymerase family, member 16
1417588_at	Galnt3	8.1853	9.53818	7.97583	8.22177	2.55421	Cluster 1	UDP-N-acetyl-alpha-D-galactosamine:polypeptide N-acetylgalactosaminyltransferase 3
1416390_at	Rcbtb2	6.34001	7.69178	6.36137	5.98486	2.55225	Cluster 1	regulator of chromosome condensation (RCC1) and BTB (POZ) domain containing protein 2
1419132_at	Tlr2	11.4988	12.8487	10.7148	10.4029	2.54901	Cluster 1	toll-like receptor 2
1417817_a_at	Wwtr1	6.50738	7.85715	5.94489	5.5062	2.54872	Cluster 1	WW domain containing transcription regulator 1
1455161_at	AI504432	10.4861	11.8325	10.4046	9.73641	2.5428	Cluster 1	expressed sequence AI504432
1427668_at	Siglec1	5.32539	6.66688	5.34073	4.77048	2.53412	Cluster 1	sialic acid binding Ig-like lectin 1, sialoadhesin
1421889_a_at	Aplp2	7.97793	9.31362	7.86264	7.94436	2.52396	Cluster 1	amyloid beta (A4) precursor-like protein 2
1416066_at	Cd9	12.2751	13.6034	11.7303	11.4484	2.51118	Cluster 1	CD9 antigen
1418162_at	Tlr4	8.40088	9.72881	8.36958	7.65534	2.51043	Cluster 1	toll-like receptor 4
1417290_at	Lrg1	6.05675	7.38102	6.06768	5.96144	2.50407	Cluster 1	leucine-rich alpha-2-glycoprotein 1
1419365_at	Pex11a	6.38286	7.70426	6.17961	5.47139	2.49909	Cluster 1	peroxisomal biogenesis factor 11 alpha
1422780_at	Pxmp4	7.71078	9.03082	7.48288	7.65024	2.49674	Cluster 1	peroxisomal membrane protein 4
1454840_at	Mccc2	8.4944	9.81297	8.35973	7.95539	2.49418	Cluster 1	methylcrotonoyl-Coenzyme A carboxylase 2 (beta)
1439835_x_at	Abcd2	4.88002	6.19551	4.83661	4.73572	2.48887	Cluster 1	ATP-binding cassette, sub-family D (ALD), member 2
1447277_s_at	Pcyox1	11.7294	13.0438	11.3572	10.8504	2.48699	Cluster 1	prenylcysteine oxidase 1
1455588_at	Lyrm4	8.65077	9.96346	8.55193	8.18515	2.48404	Cluster 1	LYR motif containing 4
1452592_at	Mgst2	7.10548	8.41667	7.519	6.93053	2.48146	Cluster 1	microsomal glutathione S-transferase 2
1436729_at	Afap1	9.18669	10.4942	8.28315	7.64184	2.4752	Cluster 1	actin filament associated protein 1
1421959_s_at	Adcy3	6.49382	7.79891	6.36581	6.25842	2.471	Cluster 1	adenylate cyclase 3
1424869_at	Dhrs7b /// LOC100045214	8.80814	10.1114	8.62444	8.78743	2.46779	Cluster 1	dehydrogenase/reductase (SDR family) member 7B
1455112_at	Aifm2	6.06764	7.36873	6.22459	6.01557	2.46415	Cluster 1	apoptosis-inducing factor, mitochondrion-associated 2
1442560_at		6.04407	7.34391	6.06114	5.85448	2.462	Cluster 1	---
1456893_at		8.31158	9.60957	8.77632	7.75436	2.45886	Cluster 1	---
1423519_at	Fam108c	9.17475	10.4639	8.96578	8.89563	2.44379	Cluster 1	family with sequence similarity 108, member C
1455438_at		6.93817	8.22721	7.04376	7.02844	2.44365	Cluster 1	peroxisomal membrane protein 4
1441353_at	Nav2	6.11396	7.40114	5.5037	5.16526	2.4405	Cluster 1	neuron navigator 2
1434484_at	1100001G20Rik	8.99262	10.2763	7.87142	7.18483	2.43467	Cluster 1	RIKEN cDNA 1100001G20 gene
1450652_at	Ctsk	10.8443	12.1272	9.80963	9.55938	2.43343	Cluster 1	cathepsin K
1456403_at	Pag1	7.50838	8.79063	7.03913	6.89447	2.43219	Cluster 1	phosphoprotein associated with glycosphingolipid microdomains 1
1423801_a_at	Aprt	9.88088	11.1509	9.98015	10.073	2.41168	Cluster 1	adenine phosphoribosyl transferase
1456361_at	Afap1	6.25758	7.52663	5.79566	5.37918	2.41003	Cluster 1	actin filament associated protein 1
1450967_at	Ptplad2	9.1794	10.4467	9.70965	8.9901	2.40714	Cluster 1	protein tyrosine phosphatase-like A domain containing 2
1436928_s_at	Adcy3	8.32498	9.5923	8.17528	8.0513	2.40714	Cluster 1	adenylate cyclase 3
1428385_at	2011-03-08	8.44279	9.70797	8.59142	8.24759	2.40358	Cluster 1	membrane-associated ring finger (C3HC4) 8
1439185_x_at	Mavs	8.99768	10.2628	8.77307	9.21278	2.40344	Cluster 1	mitochondrial antiviral signaling protein
1438585_at	Syne2	5.7502	7.01191	5.28408	5.40578	2.39779	Cluster 1	synaptic nuclear envelope 2
1427943_at	Acyp2	6.25941	7.51952	6.05991	6.32584	2.39514	Cluster 1	acylphosphatase 2, muscle type
1420249_s_at	Ccl6	12.1914	13.4505	12.7541	12.0231	2.39337	Cluster 1	chemokine (C-C motif) ligand 6
1448910_at	Pecr	7.13015	8.38883	6.95688	6.66127	2.39277	Cluster 1	peroxisomal trans-2-enoyl-CoA reductase
1417877_at	Eepd1	7.90057	9.15842	7.85521	7.58552	2.3914	Cluster 1	endonuclease/exonuclease/phosphatase family domain containing 1
1417932_at	Il18	10.8232	12.0784	9.92819	9.31418	2.38713	Cluster 1	interleukin 18
1437396_at	Creb3l2	6.99104	8.24511	6.72836	7.14956	2.38513	Cluster 1	cAMP responsive element binding protein 3-like 2
1455405_at	Pstpip2	8.46705	9.71971	8.36205	8.10281	2.38281	Cluster 1	proline-serine-threonine phosphatase-interacting protein 2
1445695_at		5.4342	6.68379	5.51501	5.45266	2.37774	Cluster 1	---
1418163_at	Tlr4	7.70857	8.95586	7.70472	7.29324	2.37395	Cluster 1	toll-like receptor 4
1419286_s_at	Ift81	6.07828	7.325	5.79111	5.76184	2.37301	Cluster 1	intraflagellar transport 81 homolog (Chlamydomonas)
1454628_at	Iffo1	7.8856	9.13232	7.83337	7.252	2.37301	Cluster 1	intermediate filament family orphan 1
1425627_x_at	Gstm1	7.06466	8.31054	6.96199	6.78091	2.37162	Cluster 1	glutathione S-transferase, mu 1
1435280_at	AI452195	6.53423	7.77829	6.55457	6.36583	2.36863	Cluster 1	expressed sequence AI452195
1455746_at	Kif13a	8.39521	9.63884	8.56632	8.28622	2.36793	Cluster 1	kinesin family member 13A
1430826_s_at	Gcnt2	4.97129	6.21305	4.87094	5.09567	2.36487	Cluster 1	glucosaminyl (N-acetyl) transferase 2, I-branching enzyme
1421473_at	Il1a	6.00132	7.23844	5.87794	5.54253	2.35728	Cluster 1	interleukin 1 alpha
1452381_at	Creb3l2	7.97796	9.21388	8.02701	7.94806	2.35531	Cluster 1	cAMP responsive element binding protein 3-like 2
1417273_at	Pdk4	4.47914	5.71495	4.37729	4.22645	2.35513	Cluster 1	pyruvate dehydrogenase kinase, isoenzyme 4
1433775_at	C77080	7.94832	9.18152	7.4756	7.62456	2.35088	Cluster 1	expressed sequence C77080
1435078_at	Tanc2	7.10414	8.33511	7.15953	6.78529	2.34724	Cluster 1	tetratricopeptide repeat, ankyrin repeat and coiled-coil containing 2
1420905_at	Il17ra	10.1005	11.3308	10.2764	10.0785	2.34624	Cluster 1	interleukin 17 receptor A
1436317_at	Pgap1	6.07678	7.30645	6.39149	5.92166	2.34513	Cluster 1	hypothetical protein LOC100504348
1417669_at	Abhd12	10.9905	12.2122	10.8768	10.658	2.33225	Cluster 1	abhydrolase domain containing 12
1452903_at	6230427J02Rik	7.42023	8.63945	7.45358	7.62325	2.3282	Cluster 1	RIKEN cDNA 6230427J02 gene
1426917_s_at	Scrn3	5.13658	6.35445	4.87182	4.70122	2.32603	Cluster 1	secernin 3
1434329_s_at	Adipor2	10.713	11.9306	10.5317	10.1626	2.32552	Cluster 1	adiponectin receptor 2
1452141_a_at	Sepp1	12.1032	13.3205	12.864	11.8069	2.32513	Cluster 1	selenoprotein P, plasma, 1
1420641_a_at	Sqrdl	9.00116	10.2178	9.25956	8.92712	2.32406	Cluster 1	sulfide quinone reductase-like (yeast)
1420904_at	Il17ra	6.39606	7.61153	6.53049	6.56459	2.32217	Cluster 1	interleukin 17 receptor A
1425229_a_at	Tcf7l2	5.64539	6.85823	5.6858	5.36213	2.31794	Cluster 1	transcription factor 7-like 2, T-cell specific, HMG-box
1449141_at	Fblim1	5.95029	7.16308	6.02088	6.11488	2.31785	Cluster 1	filamin binding LIM protein 1
1436539_at	Clmn	4.9076	6.1179	5.02939	4.9732	2.31385	Cluster 1	calmin
1436779_at	Cybb	8.41052	9.62081	9.10152	8.10025	2.31383	Cluster 1	cytochrome b-245, beta polypeptide
1416440_at	Cd164	12.7187	13.9284	12.9022	12.7512	2.31287	Cluster 1	CD164 antigen
1448655_at	Lrp1	10.3322	11.537	10.161	9.63738	2.30511	Cluster 1	low density lipoprotein receptor-related protein 1
1455249_at		8.74979	9.95329	8.53274	8.14712	2.30297	Cluster 1	solute carrier family 36 (proton/amino acid symporter), member 4
1423456_at	Bzw2	8.69798	9.90115	8.58184	8.97443	2.30245	Cluster 1	basic leucine zipper and W2 domains 2
1455687_at	Ick	5.55721	6.75956	5.49116	5.49222	2.30115	Cluster 1	intestinal cell kinase
1447551_x_at	Lphn3	4.89452	6.09589	4.75486	4.67841	2.29958	Cluster 1	latrophilin 3
1434928_at	Gas2l1	9.36563	10.5661	9.25815	9.12803	2.29814	Cluster 1	growth arrest-specific 2 like 1
1443822_s_at	Cisd1	7.55252	8.74887	7.35895	7.73283	2.2916	Cluster 1	CDGSH iron sulfur domain 1
1442416_at	D930001B02	8.24533	9.43591	8.16437	7.58431	2.28244	Cluster 1	hypothetical protein D930001B02
1423586_at	Axl	10.0641	11.2532	10.1081	9.59205	2.28011	Cluster 1	AXL receptor tyrosine kinase
1455002_at	Ptp4a1	9.98031	11.1693	10.0559	9.49776	2.2799	Cluster 1	protein tyrosine phosphatase 4a1
1429604_at	1810011H11Rik	6.67799	7.8664	7.03388	6.45131	2.27901	Cluster 1	RIKEN cDNA 1810011H11 gene
1418042_a_at	Abcc5	9.28804	10.474	8.93782	8.65436	2.27516	Cluster 1	ATP-binding cassette, sub-family C (CFTR/MRP), member 5
1460409_at	Cpt1a	10.5524	11.738	10.1886	10.0336	2.27456	Cluster 1	carnitine palmitoyltransferase 1a, liver
1422662_at	Lgals8	8.67854	9.86029	8.93692	8.6691	2.26852	Cluster 1	lectin, galactose binding, soluble 8
1417693_a_at	Gab1	5.71329	6.89454	5.76876	5.39524	2.26773	Cluster 1	growth factor receptor bound protein 2-associated protein 1
1451703_s_at	Aprt	11.6277	12.8052	11.7283	11.7505	2.2619	Cluster 1	adenine phosphoribosyl transferase
1416999_at	Smpd2	8.68754	9.86425	8.74233	8.73511	2.26061	Cluster 1	sphingomyelin phosphodiesterase 2, neutral
1448664_a_at	Speg	5.22159	6.3959	5.30886	5.41295	2.25685	Cluster 1	SPEG complex locus
1420583_a_at	Rora	6.20238	7.37525	6.1103	6.41597	2.25459	Cluster 1	RAR-related orphan receptor alpha
1459032_at		5.36605	6.538	5.13317	5.19013	2.25315	Cluster 1	---
1436966_at	Peli2	6.31602	7.48117	6.39979	6.06397	2.24257	Cluster 1	pellino 2
1437247_at	Fosl2 /// LOC634417	9.78231	10.9465	10.1625	9.69203	2.24107	Cluster 1	fos-like antigen 2
1448227_at	Grb7	5.98678	7.14729	6.06663	5.84238	2.23535	Cluster 1	growth factor receptor bound protein 7
1418072_at	Hist1h2bc	9.56154	10.7177	9.45709	9.84792	2.22867	Cluster 1	histone cluster 1, H2bc
1434191_at	Tmem195	8.03581	9.18968	6.55841	5.39909	2.2251	Cluster 1	transmembrane protein 195
1457026_at	Liph	5.1777	6.32962	5.20709	4.82147	2.22209	Cluster 1	lipase, member H
1442145_at	Atp13a3	8.73283	9.88375	8.8755	8.73698	2.22056	Cluster 1	ATPase type 13A3
1423835_at	Zfp503	6.58673	7.73658	6.29583	6.21141	2.2189	Cluster 1	zinc finger protein 503
1435748_at	Gda	10.8226	11.9714	11.5548	10.399	2.21731	Cluster 1	guanine deaminase
1434575_at	Epb4.1l1	6.32218	7.47019	6.20114	6.19103	2.21609	Cluster 1	erythrocyte protein band 4.1-like 1
1454822_x_at	Apcdd1	6.1317	7.27456	5.97822	5.98578	2.20818	Cluster 1	adenomatosis polyposis coli down-regulated 1
1437103_at	Igf2bp2	5.54566	6.67912	5.51961	5.23274	2.19384	Cluster 1	insulin-like growth factor 2 mRNA binding protein 2
1443331_at		6.55232	7.68369	6.58951	6.41005	2.19067	Cluster 1	---
1430148_at	Rab19	8.5125	9.64386	8.31173	8.14648	2.19065	Cluster 1	RAB19, member RAS oncogene family
1435436_at	Epas1	7.4079	8.539	7.36173	6.68997	2.19026	Cluster 1	endothelial PAS domain protein 1
1425644_at	Lepr	5.09624	6.22424	4.92052	4.84123	2.18556	Cluster 1	leptin receptor
1429324_at	1700012A16Rik	6.64829	7.77593	6.66807	6.33305	2.18501	Cluster 1	RIKEN cDNA 1700012A16 gene
1416357_a_at	Mcam	6.81461	7.94077	6.62211	6.17902	2.18277	Cluster 1	melanoma cell adhesion molecule
1460474_at	2610028L16Rik	6.26643	7.3915	6.35884	5.98958	2.18113	Cluster 1	RIKEN cDNA 2610028L16 gene
1420810_at	1500003O03Rik	9.16175	10.2834	9.2736	8.77912	2.17592	Cluster 1	RIKEN cDNA 1500003O03 gene
1415941_s_at	Zfand2a	9.01718	10.138	8.68812	8.83258	2.17473	Cluster 1	zinc finger, AN1-type domain 2A
1415940_at	Zfand2a	10.0056	11.1259	9.82575	9.83162	2.17394	Cluster 1	zinc finger, AN1-type domain 2A
1456087_at	Nfia	6.98055	8.09957	6.71178	6.52122	2.17199	Cluster 1	nuclear factor I/A
1417888_at	Trim13	6.43874	7.55584	6.5892	6.10161	2.1691	Cluster 1	tripartite motif-containing 13
1460694_s_at	Svil	10.6618	11.7785	10.5221	10.3939	2.1686	Cluster 1	supervillin
1455665_at	LOC631639 /// Lonrf1	8.68363	9.79919	8.23178	7.96704	2.16678	Cluster 1	LON peptidase N-terminal domain and ring finger 1
1428804_at	Mfap3l	4.73056	5.84266	4.79083	4.56785	2.1616	Cluster 1	microfibrillar-associated protein 3-like
1455134_at	D730040F13Rik	7.0815	8.19267	6.76643	6.29166	2.16022	Cluster 1	RIKEN cDNA D730040F13 gene
1422084_at	Bmx	6.17051	7.28118	5.21504	4.70048	2.15946	Cluster 1	BMX non-receptor tyrosine kinase
1450058_at	Asph	6.25801	7.36814	6.19468	5.82885	2.15865	Cluster 1	aspartate-beta-hydroxylase
1439181_at	BC043301	6.75929	7.86883	6.46994	6.30928	2.15776	Cluster 1	zinc finger protein 658
1437259_at	Slc9a2	5.65169	6.76011	5.34154	5.38643	2.15611	Cluster 1	solute carrier family 9 (sodium/hydrogen exchanger), member 2
1428758_at	Tmem86a	9.50249	10.6082	9.57012	9.59338	2.15202	Cluster 1	transmembrane protein 86A
1416934_at	Mtm1	7.93179	9.03266	7.81309	7.48392	2.14483	Cluster 1	X-linked myotubular myopathy gene 1
1435009_at	Slc9a6	8.52168	9.62176	8.27041	8.71915	2.14367	Cluster 1	solute carrier family 9 (sodium/hydrogen exchanger), member 6
1427564_at	Diap2	8.1904	9.29043	8.32836	8.24349	2.14359	Cluster 1	diaphanous homolog 2 (Drosophila)
1424354_at	Tmem140	6.98465	8.08387	7.29305	6.73924	2.14239	Cluster 1	transmembrane protein 140
1426397_at	Tgfbr2	11.8911	12.9861	11.731	11.3817	2.13619	Cluster 1	transforming growth factor, beta receptor II
1455960_at	Megf9	6.04461	7.13693	5.89133	5.92271	2.13217	Cluster 1	multiple EGF-like-domains 9
1417266_at	Ccl6	12.6854	13.7769	13.0751	12.379	2.13089	Cluster 1	chemokine (C-C motif) ligand 6
1416671_a_at	Mcoln1	8.27702	9.36799	8.22652	8.37496	2.13017	Cluster 1	mucolipin 1
1455105_at	Ptpn12	12.2665	13.3571	11.9494	11.8753	2.1297	Cluster 1	protein tyrosine phosphatase, non-receptor type 12
1425037_at	Fgd4	5.97895	7.06904	6.23044	5.65147	2.12887	Cluster 1	FYVE, RhoGEF and PH domain containing 4
1456195_x_at	Itgb5	9.48435	10.5711	9.58888	9.54248	2.12402	Cluster 1	integrin beta 5
1418890_a_at	Rab3d	8.81776	9.90439	8.8478	8.68879	2.12377	Cluster 1	RAB3D, member RAS oncogene family
1434384_at	Nrip1	8.51216	9.59713	8.7278	8.25919	2.12132	Cluster 1	nuclear receptor interacting protein 1
1448104_at	Aldh6a1	7.69977	8.78408	7.68393	7.28338	2.12036	Cluster 1	aldehyde dehydrogenase family 6, subfamily A1
1418996_a_at	Lyrm5	8.4493	9.53334	8.57194	8.3634	2.11997	Cluster 1	LYR motif containing 5
1424906_at	Pqlc3	9.88415	10.9658	9.68363	9.94827	2.11642	Cluster 1	PQ loop repeat containing
1415904_at	Lpl	12.9085	13.9857	13.3525	12.6441	2.10993	Cluster 1	lipoprotein lipase
1448491_at	Ech1	11.0359	12.1121	10.9158	11.0555	2.10855	Cluster 1	enoyl coenzyme A hydratase 1, peroxisomal
1435187_at		5.95641	7.03119	6.15755	5.55696	2.10641	Cluster 1	hypothetical LOC100502591
1435684_at	Abcc5	8.31765	9.39148	8.61675	8.0872	2.10501	Cluster 1	ATP-binding cassette, sub-family C (CFTR/MRP), member 5
1424245_at	Ces2 /// ENSMUSG00000031884	6.05777	7.13077	5.82385	5.63992	2.1038	Cluster 1	carboxylesterase 2C /// carboxylesterase 2D, pseudogene
1449145_a_at	Cav1	7.15129	8.21816	6.90027	6.61433	2.0949	Cluster 1	caveolin 1, caveolae protein
1419024_at	Ptp4a1	5.70185	6.76812	5.83808	5.27144	2.09401	Cluster 1	protein tyrosine phosphatase 4a1
1417246_at	Pzp	4.7579	5.82345	4.72355	4.94347	2.09298	Cluster 1	pregnancy zone protein
1437670_x_at	Cd151	9.7862	10.8507	9.91773	9.7629	2.09137	Cluster 1	CD151 antigen
1426584_a_at	Sord	7.6072	8.67122	7.60457	7.62519	2.09074	Cluster 1	sorbitol dehydrogenase
1449702_at	Zfand2a	9.36323	10.4268	8.97686	9.25386	2.09009	Cluster 1	zinc finger, AN1-type domain 2A
1450479_x_at	Ptpn12	11.1185	12.1761	10.7889	10.807	2.0814	Cluster 1	protein tyrosine phosphatase, non-receptor type 12
1448525_a_at	Bnip3l	8.10561	9.16102	7.74925	7.30639	2.07831	Cluster 1	BCL2/adenovirus E1B interacting protein 3-like
1422147_a_at	Pla2g6	6.30057	7.35587	6.49482	6.03252	2.07814	Cluster 1	phospholipase A2, group VI
1454236_a_at	Fam118b	8.42351	9.47876	8.03603	8.02317	2.07809	Cluster 1	family with sequence similarity 118, member B
1430693_at	Pnpla5	5.89434	6.94744	5.70042	5.6054	2.07499	Cluster 1	patatin-like phospholipase domain containing 5
1438664_at	Prkar2b	9.13001	10.1827	8.43426	8.02008	2.07441	Cluster 1	protein kinase, cAMP dependent regulatory, type II beta
1416947_s_at	Acaa1a /// Acaa1b	11.4377	12.489	11.3476	11.4385	2.07245	Cluster 1	acetyl-Coenzyme A acyltransferase 1A /// acetyl-Coenzyme A acyltransferase 1B
1423626_at	Dst	9.05864	10.108	7.92065	7.8635	2.06958	Cluster 1	dystonin
1447088_at		6.4129	7.4603	6.61357	6.33583	2.06679	Cluster 1	---
1422045_a_at	Ptpn12	12.0307	13.0767	11.6081	11.4526	2.06469	Cluster 1	protein tyrosine phosphatase, non-receptor type 12
1438056_x_at	Abcc5	7.50195	8.54625	7.5271	7.43207	2.06237	Cluster 1	ATP-binding cassette, sub-family C (CFTR/MRP), member 5
1450643_s_at	Acsl1	7.41348	8.45741	7.52692	7.56338	2.06184	Cluster 1	acyl-CoA synthetase long-chain family member 1
1426376_at	Reep5	9.14385	10.1862	9.04779	8.75452	2.05954	Cluster 1	receptor accessory protein 5
1450731_s_at	Tnfrsf21	9.11394	10.1557	9.12192	8.58234	2.05872	Cluster 1	tumor necrosis factor receptor superfamily, member 21
1442003_at	Diap2	9.99329	11.0328	9.95598	9.77976	2.05547	Cluster 1	diaphanous homolog 2 (Drosophila)
1448319_at	Akr1b3	11.6183	12.6575	11.4314	11.5381	2.05517	Cluster 1	aldo-keto reductase family 1, member B3 (aldose reductase)
1439478_at	Acot2	8.29139	9.33048	8.2677	8.25453	2.05493	Cluster 1	acyl-CoA thioesterase 2
1418257_at	Slc12a7	9.86181	10.8981	9.69897	9.48563	2.05095	Cluster 1	solute carrier family 12, member 7
1427957_at	9530008L14Rik	5.32226	6.35733	5.34452	5.36499	2.04921	Cluster 1	RIKEN cDNA 9530008L14 gene
1428241_at	2310035K24Rik	7.58052	8.61417	7.56776	7.62723	2.04719	Cluster 1	RIKEN cDNA 2310035K24 gene
1449322_at	EG546482 /// EG667723 /// LOC100044642 /// OTTMUSG00000011595 /// OTTMUSG00000026290 /// Ptp4a1	10.0165	11.0489	10.0769	9.55993	2.04544	Cluster 1	protein tyrosine phosphatase 4a1-like /// protein tyrosine phosphatase 4a1
1451259_at	Rexo2	10.6901	11.7203	10.7453	10.7421	2.04232	Cluster 1	REX2, RNA exonuclease 2 homolog (S. cerevisiae)
1436574_at	1700029I01Rik	8.1708	9.19923	8.3283	7.86111	2.0398	Cluster 1	RIKEN cDNA 1700029I01 gene
1450410_a_at	Slc48a1	9.04525	10.0732	9.05138	9.00423	2.03917	Cluster 1	solute carrier family 48 (heme transporter), member 1
1422659_at	Camk2d	5.45658	6.48385	5.52128	4.78387	2.03816	Cluster 1	calcium/calmodulin-dependent protein kinase II, delta
1420621_a_at	App	10.7828	11.808	10.6747	10.7165	2.0353	Cluster 1	amyloid beta (A4) precursor protein
1418758_a_at	Cyth3	9.6935	10.7182	9.36633	8.94043	2.0345	Cluster 1	cytohesin 3
1437385_at	Ccbe1	5.51959	6.54214	5.771	5.5477	2.03152	Cluster 1	collagen and calcium binding EGF domains 1
1439274_at	A230083H22Rik	5.32644	6.34748	5.19718	5.16505	2.02938	Cluster 1	prune homolog 2 (Drosophila)
1451361_a_at	Pnpla7	9.6337	10.654	9.24428	8.83554	2.02834	Cluster 1	patatin-like phospholipase domain containing 7
1436570_at		11.8226	12.842	11.313	10.527	2.0271	Cluster 1	phosphoprotein associated with glycosphingolipid microdomains 1
1427060_at	Mapk3	9.83545	10.8521	9.67259	9.45879	2.02318	Cluster 1	mitogen-activated protein kinase 3
1433725_at	Acvr1b	10.3174	11.3335	9.98627	10.1454	2.02244	Cluster 1	activin A receptor, type 1B
1454677_at	Timp2	9.96646	10.9814	10.341	9.79804	2.02085	Cluster 1	tissue inhibitor of metalloproteinase 2
1456590_x_at	Akr1b3	11.1887	12.2036	11.055	11.2021	2.02079	Cluster 1	aldo-keto reductase family 1, member B3 (aldose reductase)
1425451_s_at	Chi3l3 /// Chi3l4	13.8676	14.8807	14.0104	13.4095	2.01818	Cluster 1	chitinase 3-like 3 /// chitinase 3-like 4
1429831_at	Pik3ap1	9.74379	10.7539	9.2224	9.17535	2.014	Cluster 1	phosphoinositide-3-kinase adaptor protein 1
1439375_x_at	Aldoa /// Aldoart1	11.1419	12.1517	11.2392	11.2354	2.01367	Cluster 1	aldolase A, fructose-bisphosphate
1452301_at	Aldh3b1	9.10538	10.1119	8.96714	8.39572	2.00908	Cluster 1	aldehyde dehydrogenase 3 family, member B1
1420127_s_at	Ccpg1	9.43744	10.4387	8.95642	8.7726	2.0018	Cluster 1	cell cycle progression 1 /// dyslexia susceptibility 1 candidate 1 homolog (human)
1433833_at	Fndc3b	10.5053	11.5061	10.4879	10.3515	2.00111	Cluster 1	fibronectin type III domain containing 3B
1424305_at	Igj	5.26272	8.79568	7.99511	6.89639	11.5752	Cluster 2	immunoglobulin joining chain
1449305_at	F10	8.96805	11.7666	10.7458	10.6423	6.95722	Cluster 2	coagulation factor X
1449077_at	Eraf	7.7588	10.5349	8.23079	8.10302	6.85005	Cluster 2	alpha hemoglobin stabilizing protein
1445574_at		6.67042	9.35831	8.48039	7.9447	6.44369	Cluster 2	---
1429064_at	Dip2c	7.06897	9.6376	7.73815	7.2759	5.93246	Cluster 2	DIP2 disco-interacting protein 2 homolog C (Drosophila)
1438937_x_at	Ang	7.24362	9.79849	8.8019	7.24109	5.87613	Cluster 2	angiogenin, ribonuclease, RNase A family, 5
1427102_at	Slfn4	6.18524	8.67656	7.75854	6.99827	5.6229	Cluster 2	schlafen 4
1437687_x_at	Fkbp9	7.2685	9.75302	8.15925	7.90283	5.59649	Cluster 2	FK506 binding protein 9
1426604_at	Rnasel	7.11112	9.51892	8.0199	7.23521	5.30664	Cluster 2	ribonuclease L (2', 5'-oligoisoadenylate synthetase-dependent)
1418992_at	F10	6.20464	8.58897	7.9149	7.1847	5.22102	Cluster 2	coagulation factor X
1418967_a_at	St7	6.23422	8.59347	6.94356	6.8278	5.13106	Cluster 2	suppression of tumorigenicity 7
1418398_a_at	Tspan32	5.956	8.26845	7.52581	6.31984	4.96727	Cluster 2	tetraspanin 32
1438936_s_at	Ang	8.63573	10.929	10.0478	9.11937	4.90163	Cluster 2	angiogenin, ribonuclease, RNase A family, 5
1433908_a_at	Cttn	6.40903	8.65482	7.11749	7.29365	4.74295	Cluster 2	cortactin
1415936_at	Bcar3	8.8055	11.0335	9.15051	9.15754	4.68475	Cluster 2	breast cancer anti-estrogen resistance 3
1422603_at	Rnase4	8.57642	10.8043	10.1225	9.01678	4.68445	Cluster 2	ribonuclease, RNase A family 4
1424704_at	Runx2	7.66204	9.85272	9.37582	8.62136	4.56521	Cluster 2	runt related transcription factor 2
1434399_at	Galnt6 /// LOC100047499	8.19581	10.3745	8.78628	8.95479	4.52747	Cluster 2	UDP-N-acetyl-alpha-D-galactosamine:polypeptide N-acetylgalactosaminyltransferase 6
1436590_at	Ppp1r3b	6.67289	8.83791	7.27454	7.4832	4.48473	Cluster 2	protein phosphatase 1, regulatory (inhibitor) subunit 3B
1425951_a_at	Clec4n	9.10022	11.2586	9.63288	9.32829	4.46413	Cluster 2	C-type lectin domain family 4, member n
1449945_at	Ppargc1b	6.66101	8.79226	7.9587	7.66851	4.38097	Cluster 2	peroxisome proliferative activated receptor, gamma, coactivator 1 beta
1421840_at	Abca1	9.12156	11.2084	9.97402	9.36173	4.24816	Cluster 2	ATP-binding cassette, sub-family A (ABC1), member 1
1450513_at	Cd33	8.15431	10.2267	8.66534	8.56923	4.20574	Cluster 2	CD33 antigen
1424524_at	1200002N14Rik	8.73548	10.787	9.52879	9.48257	4.14544	Cluster 2	DNA-damage regulated autophagy modulator 1
1419769_at	Cd22	5.89089	7.94024	6.58861	5.92974	4.1392	Cluster 2	CD22 antigen
1453892_at	A930007I19Rik	5.38081	7.41243	5.64981	5.86537	4.08864	Cluster 2	RIKEN cDNA A930007I19 gene
1419768_at	Cd22	9.56002	11.5742	10.6545	9.45964	4.03946	Cluster 2	CD22 antigen
1423475_at	Cnnm2	5.53993	7.50593	5.70203	5.90004	3.90682	Cluster 2	cyclin M2
1417009_at	C1r	5.50247	7.46521	5.86214	5.78658	3.89802	Cluster 2	complement component 1, r subcomponent A
1428635_at	Comtd1	7.56238	9.51277	8.45032	8.73754	3.8648	Cluster 2	catechol-O-methyltransferase domain containing 1
1426603_at	Rnasel	7.49044	9.43292	8.21782	7.7697	3.84365	Cluster 2	ribonuclease L (2', 5'-oligoisoadenylate synthetase-dependent)
1421923_at	Sh3bp5	8.25713	10.1964	9.31968	8.2271	3.83514	Cluster 2	SH3-domain binding protein 5 (BTK-associated)
1452664_a_at	Tm7sf3	7.93808	9.8709	8.99639	8.82924	3.818	Cluster 2	transmembrane 7 superfamily member 3
1460361_at	5033414D02Rik	9.21352	11.1448	10.1589	10.4389	3.8139	Cluster 2	RIKEN cDNA 5033414D02 gene
1420498_a_at	Dab2	10.3128	12.2343	11.4695	11.5418	3.78826	Cluster 2	disabled homolog 2 (Drosophila)
1440926_at	Flt1	5.43667	7.35576	6.17072	6.09866	3.78184	Cluster 2	FMS-like tyrosine kinase 1
1450355_a_at	Capg	10.4814	12.3963	11.4746	11.4368	3.77067	Cluster 2	capping protein (actin filament), gelsolin-like
1437113_s_at	Pld1	7.15931	9.07123	7.92863	7.51437	3.76308	Cluster 2	phospholipase D1
1460634_at	Ralgds	7.09394	9.00082	7.87982	7.64341	3.74997	Cluster 2	ral guanine nucleotide dissociation stimulator
1420697_at	Slc15a3	10.1199	12.0029	11.2105	11.1476	3.68841	Cluster 2	solute carrier family 15, member 3
1425503_at	Gcnt2	8.29075	10.1711	8.7041	8.52632	3.68161	Cluster 2	glucosaminyl (N-acetyl) transferase 2, I-branching enzyme
1452220_at	Dock1	7.65267	9.52374	8.65047	8.42546	3.65804	Cluster 2	dedicator of cytokinesis 1
1417500_a_at	Tgm2	9.1816	11.0454	10.3306	9.88137	3.63974	Cluster 2	transglutaminase 2, C polypeptide
1416985_at	Sirpa	9.79117	11.6359	10.4607	10.2809	3.59186	Cluster 2	signal-regulatory protein alpha
1455214_at	Mitf	8.46465	10.3067	9.40855	9.10357	3.58518	Cluster 2	microphthalmia-associated transcription factor
1426051_a_at	Cenpb	6.68307	8.52153	7.18635	7.11284	3.57628	Cluster 2	centromere protein B
1448744_at	Galns	7.11826	8.93609	7.7136	8.03921	3.52552	Cluster 2	galactosamine (N-acetyl)-6-sulfate sulfatase
1423465_at	Frrs1 /// LOC100046401	8.49283	10.3069	9.30204	9.27134	3.5164	Cluster 2	ferric-chelate reductase 1
1451756_at	Flt1	7.88651	9.69217	8.37194	8.31579	3.49587	Cluster 2	FMS-like tyrosine kinase 1
1441945_s_at	Abhd14a	7.0028	8.80744	7.86829	7.69696	3.49342	Cluster 2	abhydrolase domain containing 14A
1431609_a_at	Acp5	9.93071	11.7307	10.557	10.535	3.48227	Cluster 2	acid phosphatase 5, tartrate resistant
1417512_at	Evi5	6.89273	8.68426	7.94597	7.33738	3.46182	Cluster 2	ecotropic viral integration site 5
1456844_at	Camk2d	4.94588	6.73702	5.55274	5.35095	3.46087	Cluster 2	calcium/calmodulin-dependent protein kinase II, delta
1451791_at	Tfpi	5.9658	7.75415	6.98374	7.20745	3.45421	Cluster 2	tissue factor pathway inhibitor
1419922_s_at	Atrnl1	8.54727	10.3329	9.90594	9.33593	3.44767	Cluster 2	attractin like 1
1429954_at	Clec4a3	11.14	12.9189	12.2807	11.8013	3.43163	Cluster 2	C-type lectin domain family 4, member a3
1453078_at	2610002M06Rik	5.03955	6.81172	5.85306	5.24402	3.41567	Cluster 2	RIKEN cDNA 2610002M06 gene
1448249_at	Gpd1	5.92325	7.69149	6.25517	6.15939	3.4064	Cluster 2	glycerol-3-phosphate dehydrogenase 1 (soluble)
1438504_x_at	Tm7sf3	7.12694	8.8835	8.13389	8.19134	3.37891	Cluster 2	Transmembrane 7 superfamily member 3
1418248_at	Gla	6.26125	8.01164	6.9163	7.04168	3.36449	Cluster 2	galactosidase, alpha
1415802_at	Slc16a1	6.39736	8.14711	7.18635	7.23314	3.36302	Cluster 2	solute carrier family 16 (monocarboxylic acid transporters), member 1
1419283_s_at	Tns1	8.94328	10.6907	9.85313	9.39445	3.35766	Cluster 2	tensin 1
1419690_at	2610002M06Rik	6.09455	7.83788	6.70501	6.46037	3.34807	Cluster 2	RIKEN cDNA 2610002M06 gene
1419665_a_at	Nupr1	7.63568	9.37142	8.23587	8.06533	3.33051	Cluster 2	nuclear protein 1
1429381_x_at	Igh /// Igh-2 /// Igh-VJ558 /// LOC544903	8.63712	10.3655	9.635	8.90048	3.31358	Cluster 2	immunoglobulin heavy chain 2 (serum IgA) /// immunoglobulin heavy chain (J558 family) /// similar to immunoglobulin mu-chain
1425763_x_at	Igh /// Igh-2 /// Igh-VJ558 /// LOC544903	9.13666	10.864	10.0519	9.12401	3.3111	Cluster 2	immunoglobulin heavy chain 2 (serum IgA) /// immunoglobulin heavy chain (J558 family) /// similar to immunoglobulin mu-chain
1455679_at	Obfc2a	7.52122	9.22576	8.51938	7.61641	3.25925	Cluster 2	oligonucleotide/oligosaccharide-binding fold containing 2A
1424032_at	Hvcn1	9.79383	11.4981	10.344	10.1449	3.25854	Cluster 2	hydrogen voltage-gated channel 1
1451310_a_at	Ctsl	10.2595	11.9625	10.6708	10.3673	3.25576	Cluster 2	cathepsin L
1428580_at	Blvra	10.9668	12.6691	11.2627	11.1433	3.25415	Cluster 2	biliverdin reductase A
1424265_at	Npl	5.8362	7.52855	6.88538	6.73659	3.23182	Cluster 2	N-acetylneuraminate pyruvate lyase
1448128_at	Ctsa	11.0263	12.7109	11.9945	11.8818	3.21446	Cluster 2	cathepsin A
1423917_a_at	Cttn	6.61488	8.29859	7.3226	7.15466	3.21254	Cluster 2	cortactin
1452952_at	9030418K01Rik	8.44405	10.1231	9.04335	9.41068	3.20212	Cluster 2	RIKEN cDNA 9030418K01 gene
1423805_at	Dab2	8.33986	10.0179	9.59313	8.85243	3.2	Cluster 2	disabled homolog 2 (Drosophila)
1422155_at	Hist2h3c2	5.59537	7.26987	6.27792	6.81497	3.19209	Cluster 2	histone cluster 2, H3c2, pseudogene
1424126_at	Alas1	9.82874	11.5023	10.175	10.2429	3.1899	Cluster 2	aminolevulinic acid synthase 1
1425663_at	Il1rn	7.93609	9.60586	8.62054	8.75267	3.18162	Cluster 2	interleukin 1 receptor antagonist
1449405_at	Tns1	6.87599	8.54417	7.76576	7.51029	3.17813	Cluster 2	tensin 1
1435432_at	Agap1	6.12038	7.78355	6.58502	6.46104	3.16712	Cluster 2	ArfGAP with GTPase domain, ankyrin repeat and PH domain 1
1451798_at	Il1rn	7.37278	9.02609	8.23244	8.20966	3.14555	Cluster 2	interleukin 1 receptor antagonist
1421653_a_at	Igh /// Igh-2 /// Igh-VJ558 /// LOC544903	9.73757	11.3872	10.764	9.80783	3.1376	Cluster 2	immunoglobulin heavy chain 2 (serum IgA) /// immunoglobulin heavy chain (J558 family) /// similar to immunoglobulin mu-chain
1435275_at	Cox6b2	6.21462	7.84928	6.2079	6.70011	3.10515	Cluster 2	cytochrome c oxidase subunit VIb polypeptide 2
1450455_s_at	Akr1c12 /// Akr1c13	6.7584	8.39273	7.06679	7.06609	3.10443	Cluster 2	aldo-keto reductase family 1, member C12 /// aldo-keto reductase family 1, member C13
1448564_at	Cib1	8.06483	9.69889	8.67763	8.96575	3.10385	Cluster 2	calcium and integrin binding 1 (calmyrin)
1435680_a_at	Dpp7	8.00345	9.63274	8.56514	8.64759	3.09361	Cluster 2	dipeptidylpeptidase 7
1419666_x_at	Nupr1	7.07261	8.69835	7.67511	7.64137	3.08601	Cluster 2	nuclear protein 1
1448025_at	LOC100038947 /// Sirpb1	10.8795	12.4918	11.2034	11.3472	3.05751	Cluster 2	signal-regulatory protein beta 1-like /// signal-regulatory protein beta 1A /// signal-regulatory protein beta 1B
1423824_at	Gpr177	6.34836	7.94588	6.9608	7.18241	3.02623	Cluster 2	wntless homolog (Drosophila)
1456389_at	Zeb2	5.20262	6.79198	6.26344	5.48167	3.00916	Cluster 2	zinc finger E-box binding homeobox 2
1422978_at	Cybb	9.17592	10.7274	9.71506	9.51052	2.93121	Cluster 2	cytochrome b-245, beta polypeptide
1435203_at	Man2a2	8.82886	10.3741	9.56953	9.26202	2.91847	Cluster 2	mannosidase 2, alpha 2
1436479_a_at	Dpp7	9.5742	11.116	10.2747	10.3622	2.91166	Cluster 2	dipeptidylpeptidase 7
1455282_x_at	Alas1	7.67311	9.2079	8.02967	7.97572	2.89745	Cluster 2	aminolevulinic acid synthase 1
1418806_at	Csf3r	8.05916	9.57785	8.72191	8.55547	2.86532	Cluster 2	colony stimulating factor 3 receptor (granulocyte)
1457825_x_at	Tcn2	8.50749	10.0055	9.2119	9.13987	2.82458	Cluster 2	transcobalamin 2
1452540_a_at	Hist1h2bc /// Hist1h2be /// Hist1h2bl /// Hist1h2bm /// Hist1h2bp /// LOC100046213 /// LOC665622 /// RP23-38E20.1	8.04261	9.53511	8.05817	8.49414	2.81376	Cluster 2	predicted gene 11277 /// predicted gene 13646 /// histone cluster 1, H2bc /// histone cluster 1, H2be /// histone cluster 1, H2bl /// histone cluster 1, H2bm /// histone cluster 1, H2bp
1452922_at	Ppp1r3d	6.9904	8.47441	7.23596	8.10079	2.79726	Cluster 2	protein phosphatase 1, regulatory subunit 3D
1417626_at	Pde4dip	6.81152	8.29272	7.06426	7.12329	2.79179	Cluster 2	phosphodiesterase 4D interacting protein (myomegalin)
1426368_at	LOC100044115 /// Rin2	7.15248	8.62909	7.9624	7.71173	2.78294	Cluster 2	Ras and Rab interactor 2
1428650_at	Tns1	8.27159	9.74666	8.63337	8.57138	2.77997	Cluster 2	tensin 1
1419173_at	Acy1	7.03462	8.5012	7.38688	7.42478	2.76366	Cluster 2	aminoacylase 1
1436613_at	Coro6	5.00589	6.46929	5.26805	5.16753	2.75758	Cluster 2	coronin 6
1455428_at	Fam53b	7.31801	8.78028	7.82516	7.62909	2.75541	Cluster 2	family with sequence similarity 53, member B
1458703_at		6.64161	8.10306	7.30644	6.82898	2.75384	Cluster 2	---
1431461_at	4933417E11Rik	4.94281	6.39693	5.27115	5.08608	2.73988	Cluster 2	RIKEN cDNA 4933417E11 gene
1454733_at	Nod1	7.98028	9.42731	8.62755	8.24377	2.72645	Cluster 2	nucleotide-binding oligomerization domain containing 1
1416289_at	Plod1	7.02486	8.46725	7.36417	7.45165	2.71771	Cluster 2	procollagen-lysine, 2-oxoglutarate 5-dioxygenase 1
1438511_a_at	1190002H23Rik	7.20715	8.64761	7.43128	7.86834	2.71409	Cluster 2	RIKEN cDNA 1190002H23 gene
1436321_at	B3gnt7	5.97949	7.41979	6.17767	6.20775	2.71377	Cluster 2	UDP-GlcNAc:betaGal beta-1,3-N-acetylglucosaminyltransferase 7
1416842_at	Gstm5	5.73529	7.1749	6.19698	6.06013	2.71247	Cluster 2	glutathione S-transferase, mu 5
1428733_at	Gngt2	7.40229	8.83921	7.78302	7.70631	2.70744	Cluster 2	guanine nucleotide binding protein (G protein), gamma transducing activity polypeptide 2
1450616_at	Ear5	4.70572	6.14033	5.57039	4.84105	2.70308	Cluster 2	eosinophil-associated, ribonuclease A family, member 5
1420659_at	Slamf6	6.59229	8.01567	7.74408	7.21449	2.68214	Cluster 2	SLAM family member 6
1448534_at	Sirpa	8.21207	9.63367	8.47477	8.44215	2.67882	Cluster 2	signal-regulatory protein alpha
1426784_at	Trim47	7.37318	8.79256	7.76866	7.61819	2.67471	Cluster 2	tripartite motif-containing 47
1448313_at	Tpp1	10.6872	12.0988	11.412	11.2767	2.66028	Cluster 2	tripeptidyl peptidase I
1422538_at	Extl2	8.17712	9.58228	8.56802	8.26462	2.64848	Cluster 2	exostoses (multiple)-like 2
1452907_at	Galc	6.91716	8.30704	7.52936	7.5437	2.62057	Cluster 2	galactosylceramidase
1417179_at	Tspan5	6.6397	8.02299	6.95403	7.19669	2.60863	Cluster 2	tetraspanin 5
1425068_a_at	Tex264	8.30843	9.69	8.56349	8.4997	2.60552	Cluster 2	testis expressed gene 264
1419722_at	Klk8	6.76551	8.14613	6.86143	7.33305	2.60382	Cluster 2	kallikrein related-peptidase 8
1419883_s_at	Atp6v1b2	7.09282	8.46687	7.24427	7.59471	2.59196	Cluster 2	ATPase, H+ transporting, lysosomal V1 subunit B2
1429116_at	Slc17a5	8.1896	9.56192	8.34401	8.39614	2.58888	Cluster 2	solute carrier family 17 (anion/sugar transporter), member 5
1452956_a_at	Ifi27l1	8.16904	9.53965	8.51355	8.3703	2.58579	Cluster 2	interferon, alpha-inducible protein 27 like 1
1440878_at	Runx1	9.34616	10.7165	9.30655	9.70666	2.58539	Cluster 2	runt related transcription factor 1
1449254_at	Spp1	9.86452	11.2333	9.86239	11.0562	2.58256	Cluster 2	secreted phosphoprotein 1
1429693_at	Dab2	7.6387	8.99883	8.69365	7.88055	2.56707	Cluster 2	disabled homolog 2 (Drosophila)
1452001_at	Nfe2	5.19039	6.54554	6.02182	5.7494	2.55822	Cluster 2	nuclear factor, erythroid derived 2
1436363_a_at	Nfix	8.64739	10	8.81201	9.18187	2.55382	Cluster 2	nuclear factor I/X
1436195_at	BC046404	6.1595	7.51209	6.64095	6.88138	2.55369	Cluster 2	cDNA sequence BC046404
1448200_at	Tcn2	8.64465	9.99549	9.16959	9.12586	2.5506	Cluster 2	transcobalamin 2
1440179_x_at	Rnf217	8.24827	9.58626	8.3883	8.46839	2.52799	Cluster 2	ring finger protein 217
1448502_at	Slc16a7	6.76378	8.10087	7.2527	7.06991	2.52641	Cluster 2	solute carrier family 16 (monocarboxylic acid transporters), member 7
1424378_at	Ldlrap1	5.84065	7.17706	6.38089	6.36431	2.52523	Cluster 2	low density lipoprotein receptor adaptor protein 1
1456691_s_at	Srd5a3	9.34838	10.6841	9.70396	9.96911	2.52394	Cluster 2	steroid 5 alpha-reductase 3
1434432_at	Rffl	6.69402	8.02887	7.51817	6.87811	2.52249	Cluster 2	ring finger and FYVE like domain containing protein
1435031_at	Tmem120a	7.79038	9.11779	8.07754	8.1829	2.50951	Cluster 2	transmembrane protein 120A
1422433_s_at	Idh1	10.976	12.3018	11.6642	11.2341	2.50671	Cluster 2	isocitrate dehydrogenase 1 (NADP+), soluble
1433428_x_at	Tgm2	11.7161	13.0337	12.5588	12.1251	2.49259	Cluster 2	transglutaminase 2, C polypeptide
1455900_x_at	Tgm2	11.0199	12.336	11.714	11.3742	2.48986	Cluster 2	transglutaminase 2, C polypeptide
1417667_a_at	Pter	6.08903	7.40198	6.82989	6.93341	2.48448	Cluster 2	phosphotriesterase related
1448620_at	Fcgr3	9.98534	11.2916	10.7144	10.6425	2.47297	Cluster 2	Fc receptor, IgG, low affinity III
1434513_at	Atp13a3	9.78465	11.0904	10.2772	9.88162	2.47208	Cluster 2	ATPase type 13A3
1435040_at	Irak3	6.60863	7.90885	7.31469	7.02185	2.46267	Cluster 2	interleukin-1 receptor-associated kinase 3
1460177_at	Cndp2	10.7732	12.0713	11.2058	11.0161	2.45905	Cluster 2	CNDP dipeptidase 2 (metallopeptidase M20 family)
1430776_s_at	Ankrd24	6.68436	7.98214	7.36361	6.99037	2.45851	Cluster 2	ankyrin repeat domain 24
1447800_x_at	Tcn2	10.3075	11.6042	10.8919	10.8293	2.45654	Cluster 2	transcobalamin 2
1429418_at	Cdc14b	8.08615	9.3733	8.58914	8.51135	2.44045	Cluster 2	CDC14 cell division cycle 14 homolog B (S. cerevisiae)
1448028_at	Tbc1d24	7.24165	8.528	7.86362	7.76947	2.4391	Cluster 2	TBC1 domain family, member 24
1451484_a_at	Syn1	5.81816	7.09966	6.16031	5.96319	2.43093	Cluster 2	synapsin I
1428527_at	Snx7	7.18139	8.45339	7.44784	7.72784	2.41496	Cluster 2	sorting nexin 7
1438317_a_at	Endog	5.7771	7.04851	6.11446	6.13523	2.41398	Cluster 2	endonuclease G
1450571_a_at	Bfsp1 /// LOC100048638	5.29413	6.56518	5.47368	5.4569	2.41337	Cluster 2	beaded filament structural protein 1, in lens-CP94
1423493_a_at	Nfix	5.60266	6.87357	5.87333	6.66686	2.41313	Cluster 2	nuclear factor I/X
1442051_at	Hist2h3c1	6.02854	7.29926	6.22594	6.40776	2.41282	Cluster 2	histone cluster 2, H3c1
1422191_at	Cd200r1	8.2533	9.52305	8.76776	9.05543	2.41119	Cluster 2	CD200 receptor 1
1416343_a_at	Lamp2	8.08754	9.3497	8.79251	8.84148	2.39854	Cluster 2	lysosomal-associated membrane protein 2
1430388_a_at	Sulf2	9.88999	11.1498	10.2955	10.562	2.3947	Cluster 2	sulfatase 2
1426936_at	629242 /// BC005512 /// F630007L15Rik	5.84574	7.10141	6.74257	5.73984	2.38778	Cluster 2	cDNA sequence BC005512 /// RIKEN cDNA F630007L15 gene /// predicted gene 6958
1454931_at	Eid2	7.8463	9.10125	8.06105	8.1428	2.38658	Cluster 2	EP300 interacting inhibitor of differentiation 2
1450409_a_at	Slc48a1	8.63615	9.89103	8.73728	8.86237	2.38647	Cluster 2	solute carrier family 48 (heme transporter), member 1
1422885_at	Snrpd3	6.82564	8.07835	7.50206	7.7135	2.38289	Cluster 2	small nuclear ribonucleoprotein D3
1417314_at	Cfb	8.0145	9.26658	8.40079	8.09273	2.38183	Cluster 2	complement component 2 (within H-2S) /// complement factor B
1417061_at	Slc40a1	6.41702	7.66869	7.33618	6.74525	2.38117	Cluster 2	solute carrier family 40 (iron-regulated transporter), member 1
1416679_at	Abcd3	8.89222	10.1427	9.3839	9.23229	2.37913	Cluster 2	ATP-binding cassette, sub-family D (ALD), member 3
1427035_at	Slc39a14	8.04965	9.29249	8.2677	8.19581	2.36665	Cluster 2	solute carrier family 39 (zinc transporter), member 14
1420699_at	Clec7a	12.4759	13.7168	13.2397	12.9515	2.36334	Cluster 2	C-type lectin domain family 7, member a
1448558_a_at	Pla2g4a	8.51226	9.75187	8.91283	8.96433	2.36134	Cluster 2	phospholipase A2, group IVA (cytosolic, calcium-dependent)
1447957_at	D7Ertd128e	4.85175	6.08706	5.36299	5.53388	2.35432	Cluster 2	DNA segment, Chr 7, ERATO Doi 128, expressed
1435195_at	Vash1	6.69957	7.93019	7.06287	6.83325	2.34667	Cluster 2	vasohibin 1
1433720_s_at	Chchd10	7.92289	9.15017	8.55529	8.71197	2.34125	Cluster 2	coiled-coil-helix-coiled-coil-helix domain containing 10
1450242_at	Tlr5	5.77636	7.00248	6.01061	6.00338	2.33938	Cluster 2	toll-like receptor 5
1423960_at	Lpcat3	9.74927	10.9746	9.96022	9.89741	2.33815	Cluster 2	lysophosphatidylcholine acyltransferase 3
1446380_at	9430076C15Rik	5.34439	6.56194	5.51097	5.85049	2.32551	Cluster 2	RIKEN cDNA 9430076C15 gene
1437277_x_at	Tgm2	11.4898	12.704	12.1723	11.9461	2.3201	Cluster 2	transglutaminase 2, C polypeptide
1419668_at	Sgcb	7.38795	8.60195	7.69097	7.52187	2.31978	Cluster 2	sarcoglycan, beta (dystrophin-associated glycoprotein)
1421817_at	Gsr	8.57118	9.78369	8.86323	8.82282	2.31742	Cluster 2	glutathione reductase
1417953_at	Fam3c	9.33356	10.5457	9.74222	9.72249	2.31689	Cluster 2	family with sequence similarity 3, member C
1436778_at	Cybb	11.7803	12.9919	12.2334	11.8361	2.31585	Cluster 2	cytochrome b-245, beta polypeptide
1437087_at	2210408K08Rik	8.44626	9.65457	8.97627	8.39811	2.31067	Cluster 2	RIKEN cDNA 2210408K08 gene
1428106_at	1300001I01Rik	8.36716	9.57258	8.6918	8.54524	2.30604	Cluster 2	RIKEN cDNA 1300001I01 gene
1439703_at	Cd200r1	4.7585	5.9578	5.35141	5.50514	2.29628	Cluster 2	CD200 receptor 1
1434216_a_at	Nudt19	8.4516	9.64955	8.81761	8.85926	2.29413	Cluster 2	nudix (nucleoside diphosphate linked moiety X)-type motif 19
1422186_s_at	Cyb5r3	11.0511	12.249	11.3368	11.164	2.29402	Cluster 2	cytochrome b5 reductase 3
1436562_at	Ddx58	7.48839	8.68271	8.42657	7.94696	2.28836	Cluster 2	DEAD (Asp-Glu-Ala-Asp) box polypeptide 58
1423086_at	Npc1	8.48763	9.68095	8.67207	8.76525	2.28678	Cluster 2	Niemann Pick type C1
1434768_at	Tpp1	7.36531	8.55653	7.93288	7.57561	2.28346	Cluster 2	tripeptidyl peptidase I
1444040_at	Lair1	7.49534	8.67633	8.44517	7.32041	2.26731	Cluster 2	leukocyte-associated Ig-like receptor 1
1417513_at	Evi5	10.1142	11.29	10.6019	10.629	2.25924	Cluster 2	ecotropic viral integration site 5
1426680_at	Sepn1	6.42157	7.59643	6.67886	7.11426	2.25771	Cluster 2	selenoprotein N, 1
1417008_at	Crat	7.74796	8.9156	8.10577	8.29796	2.24644	Cluster 2	carnitine acetyltransferase
1417644_at	Sspn	4.74135	5.90713	5.72302	4.46767	2.24353	Cluster 2	sarcospan
1448263_a_at	Cndp2	11.6666	12.8319	12.0233	11.9914	2.24285	Cluster 2	CNDP dipeptidase 2 (metallopeptidase M20 family)
1450107_a_at	Renbp	9.36449	10.5252	9.62248	9.79129	2.23574	Cluster 2	renin binding protein
1441850_x_at	Tcn2	7.44032	8.5993	7.82996	7.98168	2.23299	Cluster 2	transcobalamin 2
1426940_at	Sidt2	8.52292	9.6795	9.1362	8.95914	2.22929	Cluster 2	SID1 transmembrane family, member 2
1454757_s_at	Ifi27l1	9.82041	10.9747	10.2497	9.86694	2.22572	Cluster 2	interferon, alpha-inducible protein 27 like 1
1439859_at	9630033F20Rik	7.24958	8.39682	7.43532	7.54954	2.21489	Cluster 2	RIKEN cDNA 9630033F20 gene
1426801_at	2011-09-08	6.66491	7.80862	7.16497	6.66234	2.2095	Cluster 2	septin 8
1422868_s_at	Gda	6.07518	7.21586	6.9424	5.90981	2.20485	Cluster 2	guanine deaminase
1428596_at	Tbc1d9b	9.53752	10.678	9.65509	9.74624	2.2045	Cluster 2	TBC1 domain family, member 9B
1453072_at	Gpr160	8.95535	10.095	9.28036	9.55535	2.20333	Cluster 2	G protein-coupled receptor 160
1422185_a_at	Cyb5r3	9.82954	10.9683	10.2805	10.1277	2.20188	Cluster 2	cytochrome b5 reductase 3
1438962_s_at	Ddx31	7.1433	8.27559	7.26941	7.81229	2.19206	Cluster 2	DEAD/H (Asp-Glu-Ala-Asp/His) box polypeptide 31
1457603_at	Ppp1r9a	5.42604	6.55712	5.8378	5.55079	2.19022	Cluster 2	protein phosphatase 1, regulatory (inhibitor) subunit 9A
1429234_s_at	2011-09-11	9.92058	11.0513	10.5472	9.80145	2.18969	Cluster 2	septin 11
1437070_at	Cdc14b	8.00599	9.133	8.1978	8.2044	2.18405	Cluster 2	CDC14 cell division cycle 14 homolog B (S. cerevisiae)
1440527_at		6.26729	7.39406	7.05284	6.52356	2.1837	Cluster 2	---
1422822_at	Stard5	6.5387	7.6567	7.3097	7.14528	2.17046	Cluster 2	StAR-related lipid transfer (START) domain containing 5
1415814_at	Atp6v1b2	10.9467	12.0643	11.2648	11.1231	2.16981	Cluster 2	ATPase, H+ transporting, lysosomal V1 subunit B2
1417435_at	Large	8.10871	9.22558	8.32947	8.51375	2.16876	Cluster 2	like-glycosyltransferase
AFFX-GapdhMur/M32599_5_at	Gapdh	10.3169	11.4301	10.7931	11.1384	2.16321	Cluster 2	glyceraldehyde-3-phosphate dehydrogenase
1436788_at	Acp2	7.965	9.07743	8.56125	8.12351	2.1621	Cluster 2	acid phosphatase 2, lysosomal
1448904_at	Fam3c	7.46563	8.57503	8.26552	7.83813	2.15756	Cluster 2	family with sequence similarity 3, member C
1417374_at	Tuba4a	9.74171	10.8483	9.70692	10.0358	2.15333	Cluster 2	tubulin, alpha 4A
1428181_at	Etfb	9.78482	10.8903	9.95967	10.108	2.1517	Cluster 2	electron transferring flavoprotein, beta polypeptide
1432344_a_at	Aplp2	5.55272	6.65756	5.67276	5.82398	2.15076	Cluster 2	amyloid beta (A4) precursor-like protein 2
1417105_at	Trappc2l	10.1542	11.2585	10.3854	10.6253	2.14999	Cluster 2	trafficking protein particle complex 2-like
1416531_at	Gsto1	10.6965	11.8003	11.1045	11.2746	2.1491	Cluster 2	glutathione S-transferase omega 1
1449011_at	Slc12a7	6.46055	7.55313	6.59508	6.72746	2.13254	Cluster 2	solute carrier family 12, member 7
1420159_at	Myo1e	4.99427	6.08383	5.39647	5.49597	2.12809	Cluster 2	myosin IE
1439786_at		8.23151	9.32094	8.68889	8.63525	2.1279	Cluster 2	growth factor receptor bound protein 2-associated protein 2
1454654_at	Dirc2	7.89416	8.98247	8.15374	8.10322	2.12625	Cluster 2	disrupted in renal carcinoma 2 (human)
1424183_at	Acat1	9.99427	11.0822	10.4365	10.5024	2.12569	Cluster 2	acetyl-Coenzyme A acetyltransferase 1
1419169_at	Mapk6	7.96459	9.05247	8.25658	8.30011	2.12562	Cluster 2	mitogen-activated protein kinase 6
1417884_at	Slc16a6	7.78615	8.87215	8.53426	8.1892	2.12285	Cluster 2	solute carrier family 16 (monocarboxylic acid transporters), member 6
1435923_at	Ado	8.39557	9.47633	8.6953	8.9135	2.11515	Cluster 2	2-aminoethanethiol (cysteamine) dioxygenase
1440816_x_at	Ddx1	9.03713	10.1147	9.50069	9.29605	2.11055	Cluster 2	DEAD (Asp-Glu-Ala-Asp) box polypeptide 1
1435029_at		7.59508	8.67208	7.85521	7.85983	2.10966	Cluster 2	RIKEN cDNA B230120H23 gene
1426522_at	Hadhb	10.7716	11.8401	11.0254	10.9323	2.09726	Cluster 2	hydroxyacyl-Coenzyme A dehydrogenase/3-ketoacyl-Coenzyme A thiolase/enoyl-Coenzyme A hydratase (trifunctional protein), beta subunit
1436358_at	Atpaf1	7.20024	8.26804	7.93026	7.50222	2.09623	Cluster 2	ATP synthase mitochondrial F1 complex assembly factor 1
1436364_x_at	Nfix	8.44947	9.51652	8.60009	8.87902	2.09514	Cluster 2	nuclear factor I/X
1447842_x_at	Tcn2	9.70652	10.7714	10.0885	9.85034	2.09204	Cluster 2	transcobalamin 2
1418641_at	Lcp2	9.19008	10.2526	9.56972	9.48976	2.08851	Cluster 2	lymphocyte cytosolic protein 2
1451932_a_at	Adamtsl4	7.12155	8.182	7.552	7.30455	2.08558	Cluster 2	ADAMTS-like 4
1435433_at	Agap1	5.88239	6.94026	5.90642	6.21236	2.08185	Cluster 2	ArfGAP with GTPase domain, ankyrin repeat and PH domain 1
1415880_a_at	Lamp1	12.3178	13.3732	13.0159	12.8927	2.07825	Cluster 2	lysosomal-associated membrane protein 1
1420113_s_at	2410022L05Rik	6.70411	7.75872	7.27501	7.36798	2.07716	Cluster 2	RIKEN cDNA 2410022L05 gene
1428612_at	Atg7	8.44009	9.49169	8.58698	8.68184	2.07284	Cluster 2	autophagy-related 7 (yeast)
1452702_at	Clcn7	8.75333	9.80441	9.12118	9.06441	2.07207	Cluster 2	chloride channel 7
1417124_at	Dstn	11.4749	12.524	11.5559	11.6555	2.0693	Cluster 2	destrin
1415915_at	Ddx1	9.50548	10.5541	9.99011	9.89044	2.06852	Cluster 2	DEAD (Asp-Glu-Ala-Asp) box polypeptide 1
1427138_at	Ccdc88c	5.96472	7.01227	6.7758	6.34381	2.06701	Cluster 2	coiled-coil domain containing 88C
1447853_x_at	Kif13a	6.04256	7.08402	6.57739	6.29376	2.05832	Cluster 2	Kinesin family member 13A
1435098_at	AA474331	6.62828	7.66829	6.85304	6.75962	2.05624	Cluster 2	---
1451890_at	Kif13a	5.338	6.37269	5.60353	5.515	2.04868	Cluster 2	kinesin family member 13A
1435749_at	Gda	10.2906	11.3245	11.268	10.0841	2.04762	Cluster 2	guanine deaminase
1424698_s_at	Gca	7.53348	8.56622	8.1186	8.01396	2.0459	Cluster 2	grancalcin
1427683_at	Egr2	10.6096	11.6396	11.4162	10.8305	2.04199	Cluster 2	early growth response 2
1425144_at	Klk1b11	5.83932	6.86858	6.11885	6.57137	2.04098	Cluster 2	kallikrein 1-related peptidase b11
1430604_a_at	Dab2	6.49323	7.52248	6.70124	6.97459	2.04096	Cluster 2	disabled homolog 2 (Drosophila)
1416634_at	Fam96a	10.6103	11.6366	10.8453	10.9975	2.03686	Cluster 2	family with sequence similarity 96, member A
1418896_a_at	Rpn2	10.1174	11.1377	10.3551	10.593	2.02824	Cluster 2	ribophorin II
1452196_a_at	Nckap1	6.73751	7.75731	7.00104	7.66078	2.02764	Cluster 2	NCK-associated protein 1
1418569_at	Fblim1	5.17866	6.19754	5.4715	5.55299	2.02635	Cluster 2	filamin binding LIM protein 1
1423357_at	2610209A20Rik	6.5215	7.5397	6.64988	7.06585	2.02539	Cluster 2	lipoyl(octanoyl) transferase 2 (putative)
1455401_at	Camkk2	8.73664	9.75389	9.06653	8.78791	2.02405	Cluster 2	calcium/calmodulin-dependent protein kinase kinase 2, beta
1442135_at	Ado	7.61028	8.62489	8.06026	7.76143	2.02037	Cluster 2	2-aminoethanethiol (cysteamine) dioxygenase
1424475_at	Camkk2	7.38664	8.40093	7.90413	7.98607	2.01992	Cluster 2	calcium/calmodulin-dependent protein kinase kinase 2, beta
1457806_at	B830028B13Rik	6.95465	7.96695	7.51497	7.44373	2.01713	Cluster 2	Family with sequence similarity 196, member A
1448630_a_at	Sdhc	7.56951	8.58088	8.21123	8.10113	2.01583	Cluster 2	succinate dehydrogenase complex, subunit C, integral membrane protein
1424086_at	Oaf	6.56808	7.57563	7.11218	7.21809	2.01049	Cluster 2	OAF homolog (Drosophila)
1442123_at	2010012P19Rik	5.78576	6.79298	6.08262	5.90121	2.01003	Cluster 2	RIKEN cDNA 2010012P19 gene /// hypothetical LOC100503827
1423883_at	Acsl1	9.69864	10.7042	9.81379	10.0065	2.00771	Cluster 2	acyl-CoA synthetase long-chain family member 1
1437434_a_at	Gpr177	6.65863	7.66184	7.15999	7.0032	2.00445	Cluster 2	wntless homolog (Drosophila)
1436531_at	Metap2	6.91769	7.92031	7.3121	7.35032	2.00364	Cluster 2	methionine aminopeptidase 2
1433442_at	Klhl9	9.89974	10.9018	10.3847	9.81972	2.00284	Cluster 2	kelch-like 9 (Drosophila)
1427660_x_at	EG637227 /// ENSMUSG00000076577 /// Gm1420 /// Igk /// Igk-C /// Igk-V28 /// LOC100047628	4.93379	10.3266	12.1165	9.8036	42.0132	Cluster 3	predicted gene 10883 /// predicted gene 1420 /// predicted gene 7202 /// immunoglobulin kappa chain, constant region /// immunoglobulin kappa chain, joining region, 1 /// immunoglobulin kappa chain variable 28 (V28)
1452417_x_at	2010205A11Rik /// EG637227 /// ENSMUSG00000076577 /// Gm1420 /// Igk /// Igk-C /// Igk-V28 /// LOC100047628	4.45242	9.72573	11.423	9.4792	38.6742	Cluster 3	predicted gene 10883 /// predicted gene 1420 /// predicted gene 7202 /// immunoglobulin kappa chain, constant region /// immunoglobulin kappa chain, joining region, 1 /// immunoglobulin kappa chain variable 28 (V28)
1425295_at	Ear11	6.38132	11.4976	13.3434	12.2552	34.6857	Cluster 3	eosinophil-associated, ribonuclease A family, member 11
1427455_x_at	EG637227 /// ENSMUSG00000076577 /// Gm1420 /// Igk /// Igk-C /// Igk-V28 /// LOC100047628	5.67149	10.14	11.9904	9.78629	22.1385	Cluster 3	predicted gene 10883 /// predicted gene 1420 /// predicted gene 7202 /// immunoglobulin kappa chain, constant region /// immunoglobulin kappa chain, joining region, 1 /// immunoglobulin kappa chain variable 28 (V28)
1420582_at	Cd209e	5.98524	9.59492	11.5448	11.9009	12.2074	Cluster 3	CD209e antigen
1419549_at	Arg1	5.72556	8.63181	11.5566	12.0649	7.49664	Cluster 3	arginase, liver
1448261_at	Cdh1	7.08715	9.91962	9.41987	10.1797	7.12295	Cluster 3	cadherin 1
1423954_at	C3	8.47734	11.1692	11.0537	10.1953	6.46135	Cluster 3	complement component 3
1450488_at	Ccl24	6.842	9.46186	11.773	11.083	6.14693	Cluster 3	chemokine (C-C motif) ligand 24
1418993_s_at	F10	6.50895	9.00126	8.2896	7.99458	5.62678	Cluster 3	coagulation factor X
1428720_s_at	2010309G21Rik /// Igl-C2 /// Igl-C3	5.63446	8.10025	10.8659	8.528	5.52428	Cluster 3	RIKEN cDNA 2010309G21 gene /// immunoglobulin lambda chain, constant region 2 /// immunoglobulin lambda chain, constant region 3
1452014_a_at	Igf1	6.83618	9.1923	9.48073	9.69453	5.11991	Cluster 3	insulin-like growth factor 1
1449124_at	Rgl1	5.55529	7.89957	7.69502	8.08237	5.07807	Cluster 3	ral guanine nucleotide dissociation stimulator,-like 1
1448929_at	F13a1	6.49232	8.83562	9.92074	7.57643	5.07461	Cluster 3	coagulation factor XIII, A1 subunit
1419394_s_at	S100a8	7.07641	9.35557	9.43811	8.54069	4.85397	Cluster 3	S100 calcium binding protein A8 (calgranulin A)
1420338_at	Alox15	5.24994	7.44767	7.80143	7.52829	4.58758	Cluster 3	arachidonate 15-lipoxygenase
1421074_at	Cyp7b1	4.29734	6.48365	9.97346	11.1785	4.55138	Cluster 3	cytochrome P450, family 7, subfamily b, polypeptide 1
1436990_s_at	Chchd10	7.67434	9.82459	9.06315	9.20414	4.43904	Cluster 3	coiled-coil-helix-coiled-coil-helix domain containing 10
1435349_at	Nrp2	6.86891	8.94316	9.04434	8.96713	4.21125	Cluster 3	neuropilin 2
1416022_at	Fabp5	10.014	12.0714	12.3221	12.8234	4.16237	Cluster 3	fatty acid binding protein 5, epidermal
1452463_x_at	ENSMUSG00000076577	5.80811	7.85151	9.15154	7.45745	4.12218	Cluster 3	predicted gene 10883
1457434_s_at	Ptpla	7.54584	9.43802	8.99367	9.75409	3.71197	Cluster 3	protein tyrosine phosphatase-like (proline instead of catalytic arginine), member a
1437218_at	Fn1	5.78827	7.62344	7.43185	7.3241	3.56813	Cluster 3	fibronectin 1
1426642_at	Fn1	11.7673	13.5531	13.3746	13.237	3.44813	Cluster 3	fibronectin 1
1437401_at	Igf1	6.6674	8.417	9.45147	8.66938	3.36266	Cluster 3	insulin-like growth factor 1
1418176_at	Vdr	6.62742	8.36337	8.02186	8.04187	3.331	Cluster 3	vitamin D receptor
1417876_at	Fcgr1	7.80277	9.53204	9.06622	8.83549	3.31558	Cluster 3	Fc receptor, IgG, high affinity I
1448756_at	S100a9	6.28872	7.97551	8.1657	7.26806	3.21941	Cluster 3	S100 calcium binding protein A9 (calgranulin B)
1419598_at	Ms4a6d	9.72814	11.3567	11.0598	11.6846	3.09208	Cluster 3	membrane-spanning 4-domains, subfamily A, member 6D
1426775_s_at	Scamp1	7.47416	9.09912	8.51921	8.61037	3.08434	Cluster 3	secretory carrier membrane protein 1
1419714_at	Cd274	8.48064	10.0775	9.83364	9.78224	3.02481	Cluster 3	CD274 antigen
1428509_at	Myo1e	6.83541	8.4249	8.12465	7.90584	3.00944	Cluster 3	myosin IE
1435264_at	Emilin2	8.77503	10.355	9.81612	9.82435	2.98971	Cluster 3	elastin microfibril interfacer 2
1419599_s_at	Ms4a6d	10.873	12.449	12.1694	12.5259	2.98157	Cluster 3	membrane-spanning 4-domains, subfamily A, member 6D
1433966_x_at	Asns	5.17488	6.72415	6.25934	7.21243	2.9267	Cluster 3	asparagine synthetase
1428391_at	Rab3il1	7.36811	8.89766	8.98012	9.10254	2.88697	Cluster 3	RAB3A interacting protein (rabin3)-like 1
1440662_at		5.94146	7.40598	7.21027	6.84283	2.75972	Cluster 3	---
1421571_a_at	LOC100045833 /// Ly6c1 /// Ly6c2	7.68365	9.1463	10.2157	9.07228	2.75616	Cluster 3	lymphocyte antigen 6 complex, locus C1 /// lymphocyte antigen 6 complex, locus C2
1450048_a_at	Idh2	8.74845	10.2109	9.71139	9.76734	2.75572	Cluster 3	isocitrate dehydrogenase 2 (NADP+), mitochondrial
1422704_at	Gyk	7.61729	9.07092	8.70022	8.4029	2.73896	Cluster 3	glycerol kinase
1455795_at	Dse	7.13657	8.58873	8.34169	8.00511	2.73617	Cluster 3	dermatan sulfate epimerase
1425156_at	Gbp6	7.57622	9.01644	8.74386	8.57141	2.71361	Cluster 3	guanylate binding protein 6
1436614_at		7.4163	8.85495	8.48935	8.39481	2.71067	Cluster 3	---
1419610_at	Ccr1	6.11629	7.53992	7.41659	7.26154	2.68259	Cluster 3	chemokine (C-C motif) receptor 1
1434413_at	Igf1	6.87023	8.28405	9.47926	8.69784	2.66443	Cluster 3	insulin-like growth factor 1
1417963_at	Pltp	8.01966	9.43057	9.471	9.04616	2.65905	Cluster 3	phospholipid transfer protein
1425133_s_at	Rab3il1	6.66128	8.06221	8.07068	8.4207	2.64071	Cluster 3	RAB3A interacting protein (rabin3)-like 1
1419219_at	Cyp4f18 /// LOC100044439	9.47737	10.8709	10.7837	10.2072	2.62725	Cluster 3	cytochrome P450, family 4, subfamily f, polypeptide 18
1451095_at	Asns	6.11649	7.50421	7.23883	7.54329	2.61666	Cluster 3	asparagine synthetase
1456778_at		6.80187	8.18819	8.37576	8.35782	2.61412	Cluster 3	---
1430570_at	Kynu	8.31866	9.70364	10.1418	10.4964	2.61167	Cluster 3	kynureninase (L-kynurenine hydrolase)
1425179_at	Shmt1	5.92296	7.29324	6.94691	7.13337	2.5852	Cluster 3	serine hydroxymethyltransferase 1 (soluble)
1419573_a_at	Lgals1	11.5116	12.8746	12.3913	12.769	2.57213	Cluster 3	lectin, galactose binding, soluble 1
1438767_at	Osm	7.76632	9.12513	9.02759	8.85799	2.56473	Cluster 3	oncostatin M
1435448_at	Bcl2l11	10.0191	11.3763	11.0578	11.0596	2.56187	Cluster 3	BCL2-like 11 (apoptosis facilitator)
1444524_at	LOC100043424 /// OTTMUSG00000015351	7.19469	8.54712	8.04193	8.28785	2.55341	Cluster 3	predicted gene 14005
1456315_a_at	Ptpla	6.39679	7.73928	7.52872	8.17361	2.53588	Cluster 3	protein tyrosine phosphatase-like (proline instead of catalytic arginine), member a
1448881_at	Hp	7.27118	8.60894	8.52004	8.1588	2.52757	Cluster 3	haptoglobin
1419609_at	Ccr1	8.79009	10.0929	10.1798	9.72485	2.46711	Cluster 3	chemokine (C-C motif) receptor 1
1455450_at	Ptpn3	6.72523	8.0275	8.368	8.38962	2.46617	Cluster 3	protein tyrosine phosphatase, non-receptor type 3
1429570_at	Mlkl	4.66896	5.9625	5.92166	5.78057	2.45129	Cluster 3	mixed lineage kinase domain-like
1422748_at	Zeb2	8.87382	10.1587	10.4183	10.1591	2.43654	Cluster 3	zinc finger E-box binding homeobox 2
1436448_a_at	Ptgs1	6.48437	7.76789	8.86157	7.54996	2.43434	Cluster 3	prostaglandin-endoperoxide synthase 1
1428719_at	2010309G21Rik /// Igl-C2	5.67582	6.9417	10.0447	7.58055	2.40474	Cluster 3	RIKEN cDNA 2010309G21 gene /// immunoglobulin lambda chain, constant region 2
1451127_at	AW146242	7.4779	8.74183	8.75319	8.12889	2.4015	Cluster 3	vesicular, overexpressed in cancer, prosurvival protein 1
1416052_at	Prps1	8.92039	10.1781	10.0956	10.0486	2.39122	Cluster 3	phosphoribosyl pyrophosphate synthetase 1
1419684_at	Ccl8	5.69664	6.95068	9.87931	7.65327	2.38508	Cluster 3	chemokine (C-C motif) ligand 8
1460600_at	AA414768	5.44909	6.67712	6.8361	6.58274	2.34246	Cluster 3	ubiquitin-conjugating enzyme E2 Q2-like
1419519_at	Igf1	7.31586	8.52649	8.98454	8.94008	2.31439	Cluster 3	insulin-like growth factor 1
1416021_a_at	EG620603 /// Fabp5	12.8265	14.0366	14.2039	14.2579	2.31352	Cluster 3	fatty acid binding protein 5, epidermal /// predicted gene 3601
1418932_at	LOC100046232 /// Nfil3	7.49841	8.70532	8.44601	8.73893	2.30842	Cluster 3	nuclear factor, interleukin 3, regulated
1425025_at	Tmem106a	10.112	11.3151	11.0047	11.0418	2.30233	Cluster 3	transmembrane protein 106A
1418175_at	Vdr	6.31305	7.50359	7.3928	7.51165	2.28239	Cluster 3	vitamin D receptor
1422013_at	Clec4a2	10.035	11.2202	11.0028	10.6168	2.27397	Cluster 3	C-type lectin domain family 4, member a2
1434380_at	Gbp6	8.21647	9.39754	9.93928	9.18913	2.26746	Cluster 3	guanylate binding protein 6
1436032_at		5.44902	6.61905	7.12429	6.33877	2.25016	Cluster 3	---
1451386_at	Blvrb	7.76292	8.93191	8.55389	8.6308	2.24854	Cluster 3	biliverdin reductase B (flavin reductase (NADPH))
1442804_at	Fgr	9.7496	10.9183	10.665	10.8609	2.2481	Cluster 3	Gardner-Rasheed feline sarcoma viral (Fgr) oncogene homolog
1436714_at	Lpp	7.38854	8.55716	8.41948	8.59566	2.24797	Cluster 3	LIM domain containing preferred translocation partner in lipoma
1425140_at	Lactb2	6.39077	7.54695	7.67547	7.79619	2.22866	Cluster 3	lactamase, beta 2
1452789_at	Snn	7.96079	9.11366	9.67003	9.0493	2.22356	Cluster 3	stannin
1419647_a_at	Ier3	10.8975	12.0491	12.2213	12.371	2.22152	Cluster 3	immediate early response 3
1421223_a_at	Anxa4	11.5911	12.7359	12.6211	12.3928	2.21125	Cluster 3	annexin A4
1438271_at	Lpp	7.4364	8.5724	8.58458	8.74821	2.19772	Cluster 3	LIM domain containing preferred translocation partner in lipoma
1420425_at	Prdm1	6.2208	7.35636	7.23926	6.76629	2.19704	Cluster 3	PR domain containing 1, with ZNF domain
1455314_at	Lpp	8.74533	9.88081	9.89737	9.7844	2.19692	Cluster 3	LIM domain containing preferred translocation partner in lipoma
1454899_at	Lpp	8.03657	9.16738	9.22119	9.04759	2.18982	Cluster 3	LIM domain containing preferred translocation partner in lipoma
1435449_at	Bcl2l11	5.28576	6.41421	6.18451	6.43747	2.18623	Cluster 3	BCL2-like 11 (apoptosis facilitator)
1452279_at	Cfp	10.2326	11.3543	11.5434	11.8361	2.17605	Cluster 3	complement factor properdin
1417777_at	Ptgr1	9.25165	10.3546	10.231	10.3462	2.14795	Cluster 3	prostaglandin reductase 1
1428750_at	Cdc42ep2	6.96626	8.0667	7.57415	7.92773	2.1442	Cluster 3	CDC42 effector protein (Rho GTPase binding) 2
1424655_at	Acp2	8.13223	9.22275	8.87593	9.02966	2.12951	Cluster 3	acid phosphatase 2, lysosomal
1422445_at	Itga6	6.70347	7.79104	7.794	8.08002	2.12516	Cluster 3	integrin alpha 6
1449193_at	Cd5l	6.00851	7.09228	7.42667	7.41027	2.11956	Cluster 3	CD5 antigen-like
1428512_at	Bhlhb9	7.03869	8.11012	8.05503	8.96432	2.10153	Cluster 3	basic helix-loop-helix domain containing, class B9
1449156_at	Ly9	7.21753	8.28531	7.97698	8.1268	2.09621	Cluster 3	lymphocyte antigen 9
1426528_at	Nrp2	7.39167	8.45603	8.90914	8.82656	2.09123	Cluster 3	neuropilin 2
1419202_at	Cst7	5.40775	6.47209	7.60127	8.57739	2.09122	Cluster 3	cystatin F (leukocystatin)
1417492_at	Ctsb	8.57839	9.63641	9.43392	9.29289	2.08208	Cluster 3	cathepsin B
1448619_at	Dhcr7	7.2274	8.28051	7.94796	7.90411	2.07499	Cluster 3	7-dehydrocholesterol reductase
1435263_at	Tmem106a	8.70626	9.75836	9.56108	9.41521	2.07356	Cluster 3	transmembrane protein 106A
1451006_at	Xdh	7.94411	8.99578	9.50383	9.07563	2.07293	Cluster 3	xanthine dehydrogenase
1455439_a_at	Lgals1	12.6035	13.6493	13.2607	13.6328	2.06451	Cluster 3	lectin, galactose binding, soluble 1
1423812_s_at	AW146242	9.02989	10.059	10.0119	9.77233	2.04079	Cluster 3	vesicular, overexpressed in cancer, prosurvival protein 1
1420394_s_at	Gp49a /// Lilrb4	11.8954	12.9218	12.7271	12.6414	2.03694	Cluster 3	glycoprotein 49 A /// leukocyte immunoglobulin-like receptor, subfamily B, member 4
1440167_s_at	Lpp	9.34131	10.3639	10.3008	10.2333	2.03155	Cluster 3	LIM domain containing preferred translocation partner in lipoma
1436836_x_at	Cnn3 /// LOC100047856	7.07255	8.08032	10.2716	9.94822	2.01079	Cluster 3	calponin 3, acidic
1424176_a_at	Anxa4	8.87975	9.88671	9.67963	9.72746	2.00968	Cluster 3	annexin A4
1458941_at	Zeb2	7.74537	8.75057	8.96501	8.42502	2.00721	Cluster 3	zinc finger E-box binding homeobox 2
1448891_at	Fcrls	9.63983	10.6437	10.9606	9.70974	2.00538	Cluster 3	Fc receptor-like S, scavenger receptor
1418582_at	Cbfa2t3	10.5955	9.59524	10.2515	10.418	-2.00036	Cluster 4	core-binding factor, runt domain, alpha subunit 2, translocated to, 3 (human)
1449175_at	Gpr65	9.82062	8.81859	10.4417	10.1353	-2.00282	Cluster 4	G-protein coupled receptor 65
1416432_at	Pfkfb3	9.21623	8.21128	9.6572	8.89367	-2.00687	Cluster 4	6-phosphofructo-2-kinase/fructose-2,6-biphosphatase 3
1419470_at	Gnb4	9.98348	8.97782	10.4113	10.3636	-2.00785	Cluster 4	guanine nucleotide binding protein (G protein), beta 4
1435108_at	Arhgap22	9.55179	8.54322	9.73282	10.011	-2.01192	Cluster 4	Rho GTPase activating protein 22
1434442_at	Stbd1	7.84385	6.83235	7.63596	7.91096	-2.01601	Cluster 4	starch binding domain 1
1428572_at	Basp1 /// LOC100045716	12.4724	11.4605	12.8164	12.8427	-2.01666	Cluster 4	brain abundant, membrane attached signal protein 1
1450644_at	Zfp36l1	12.4032	11.3906	12.9344	12.5291	-2.01752	Cluster 4	zinc finger protein 36, C3H type-like 1
1423904_a_at	Pvr	7.39391	6.38107	8.01394	8.28278	-2.01788	Cluster 4	poliovirus receptor
1460206_at	Grasp	8.9736	7.95977	9.00418	8.94289	-2.01927	Cluster 4	GRP1 (general receptor for phosphoinositides 1)-associated scaffold protein
1435520_at	Msi2	6.95835	5.94193	7.35625	6.68992	-2.02289	Cluster 4	Musashi homolog 2 (Drosophila)
1448656_at	Cacnb3	9.46256	8.44507	10.8289	10.4528	-2.0244	Cluster 4	calcium channel, voltage-dependent, beta 3 subunit
1456795_at	D330027G24Rik	8.07984	7.05938	8.26614	8.81947	-2.02857	Cluster 4	BEN domain containing 4
1435772_at	Kif21b	8.96164	7.94027	9.22032	9.10933	-2.02985	Cluster 4	kinesin family member 21B
1457944_at		10.6203	9.59812	10.6508	10.2059	-2.03092	Cluster 4	---
1433985_at	Abi2	8.63255	7.60948	8.46929	8.34053	-2.03225	Cluster 4	abl-interactor 2
1438084_at		8.86615	7.84193	9.13455	8.51868	-2.03387	Cluster 4	---
1416288_at	Dnaja1	12.5572	11.5329	12.1105	12.8758	-2.03402	Cluster 4	DnaJ (Hsp40) homolog, subfamily A, member 1
1417010_at	Zfp238	10.2491	9.22437	10.6713	10.5604	-2.03462	Cluster 4	zinc finger protein 238
1427347_s_at	Tubb2a	11.7573	10.7288	11.8312	11.842	-2.03996	Cluster 4	tubulin, beta 2A
1456116_at	Ctnnd2 /// LOC100045979	8.2747	7.24445	8.14218	8.67677	-2.04237	Cluster 4	catenin (cadherin associated protein), delta 2
1416156_at	Vcl	10.361	9.33006	10.3249	10.1679	-2.04337	Cluster 4	vinculin
1434945_at	Lpcat2	8.94415	7.9098	8.89084	8.86058	-2.04819	Cluster 4	lysophosphatidylcholine acyltransferase 2
1447339_at		8.68403	7.64947	9.00725	8.28432	-2.04849	Cluster 4	---
1460329_at	B4galt6	9.20796	8.17305	9.35834	9.33269	-2.04898	Cluster 4	UDP-Gal:betaGlcNAc beta 1,4-galactosyltransferase, polypeptide 6
1438211_s_at	Dbp	6.31473	5.27869	6.51768	6.0685	-2.05059	Cluster 4	D site albumin promoter binding protein
1419469_at	Gnb4	8.63078	7.58908	9.11895	9.23908	-2.05866	Cluster 4	guanine nucleotide binding protein (G protein), beta 4
1418114_at	Rbpj	9.01783	7.97551	8.66959	8.74316	-2.05953	Cluster 4	recombination signal binding protein for immunoglobulin kappa J region
1455250_at	Sh3bp4	7.2819	6.23769	7.39481	7.27796	-2.06224	Cluster 4	SH3-domain binding protein 4
1431028_a_at	Pank1	7.91722	6.87256	7.59706	7.79639	-2.06288	Cluster 4	pantothenate kinase 1
1418191_at	LOC100048346 /// Usp18	8.9859	7.94101	9.56252	9.74235	-2.0632	Cluster 4	ubiquitin specific peptidase 18
1454169_a_at	Epsti1	7.95641	6.90937	8.43418	8.34953	-2.06629	Cluster 4	epithelial stromal interaction 1 (breast)
1416008_at	Satb1	6.67527	5.62807	7.28454	7.31528	-2.06652	Cluster 4	special AT-rich sequence binding protein 1
1450495_a_at	Klrk1	7.80328	6.75555	8.11926	7.95372	-2.06728	Cluster 4	killer cell lectin-like receptor subfamily K, member 1
1417419_at	Ccnd1	9.437	8.38926	9.09607	9.69556	-2.06729	Cluster 4	cyclin D1
1437921_x_at	Zfp516	8.14502	7.09727	8.00146	7.99683	-2.06731	Cluster 4	zinc finger protein 516
1419186_a_at	St8sia4	12.8629	11.8142	13.0626	12.5621	-2.06871	Cluster 4	ST8 alpha-N-acetyl-neuraminide alpha-2,8-sialyltransferase 4
1435332_at	Htr7	8.93075	7.88109	9.57039	9.809	-2.07004	Cluster 4	5-hydroxytryptamine (serotonin) receptor 7
1448126_at	Fam60a	7.9321	6.88088	8.45959	8.12959	-2.07228	Cluster 4	family with sequence similarity 60, member A
1423602_at	Traf1	10.8415	9.78891	11.6165	11.7007	-2.0743	Cluster 4	TNF receptor-associated factor 1
1417420_at	Ccnd1	10.8497	9.79115	10.5734	10.5938	-2.08287	Cluster 4	cyclin D1
1430391_a_at	St8sia4	8.47197	7.41073	8.18053	8.48851	-2.08672	Cluster 4	ST8 alpha-N-acetyl-neuraminide alpha-2,8-sialyltransferase 4
1438705_at	Cbfa2t3	11.308	10.2443	11.1541	11.1172	-2.09028	Cluster 4	core-binding factor, runt domain, alpha subunit 2, translocated to, 3 (human)
1452061_s_at	Strbp	9.855	8.7912	9.96728	9.96622	-2.09043	Cluster 4	spermatid perinuclear RNA binding protein
1425993_a_at	Hsph1	12.029	10.9632	11.4013	12.4414	-2.09328	Cluster 4	heat shock 105kDa/110kDa protein 1
1450981_at	Cnn2	12.7302	11.663	12.7678	12.9214	-2.09533	Cluster 4	calponin 2
1434929_at	BC035044	10.7789	9.71056	10.8197	11.2652	-2.09696	Cluster 4	cDNA sequence BC035044
1439141_at	Gpr18	9.17545	8.10714	9.64818	9.69206	-2.09699	Cluster 4	G protein-coupled receptor 18
1416773_at	Wee1	9.32279	8.2502	9.26598	9.02619	-2.10321	Cluster 4	WEE 1 homolog 1 (S. pombe)
1416009_at	Tspan3	10.5052	9.43147	11.1586	10.9754	-2.1048	Cluster 4	tetraspanin 3
1456739_x_at	Armcx2	10.5541	9.47796	10.493	10.4717	-2.10832	Cluster 4	armadillo repeat containing, X-linked 2
1418536_at	H2-Q7	12.0241	10.9464	12.2446	11.9244	-2.11067	Cluster 4	histocompatibility 2, Q region locus 7
1440955_at	Kcp	9.67493	8.59439	9.75056	9.84176	-2.11483	Cluster 4	kielin/chordin-like protein
1456533_at	Dpy19l1	10.7939	9.71331	10.4699	10.5468	-2.11486	Cluster 4	dpy-19-like 1 (C. elegans)
1423269_a_at	Nedd4l	9.38087	8.29724	9.27711	9.44188	-2.11937	Cluster 4	neural precursor cell expressed, developmentally down-regulated gene 4-like
1457745_at	Gpr4	8.62204	7.53827	8.41488	8.32553	-2.11957	Cluster 4	G protein-coupled receptor 4
1453016_at	Hspb11	10.469	9.38299	10.1485	10.3536	-2.12292	Cluster 4	heat shock protein family B (small), member 11
1441033_at	Tmtc2	7.08685	6.0004	7.122	7.16228	-2.12352	Cluster 4	transmembrane and tetratricopeptide repeat containing 2
1452991_at	Chd2	6.47669	5.38908	6.57165	5.96634	-2.12521	Cluster 4	chromodomain helicase DNA binding protein 2
1459876_at		8.76471	7.67259	9.07824	8.34666	-2.13187	Cluster 4	---
1424194_at	Rcsd1	10.0827	8.98922	10.5925	10.0028	-2.13383	Cluster 4	RCSD domain containing 1
1452519_a_at	Zfp36	12	10.9045	12.1372	11.531	-2.13682	Cluster 4	zinc finger protein 36
1426965_at	Rap2a	11.7494	10.6451	11.5832	11.4956	-2.1499	Cluster 4	RAS related protein 2a
1434754_at	Garnl4	9.75777	8.6484	9.72409	9.36715	-2.15751	Cluster 4	RAP1 GTPase activating protein 2
1438498_at	Zmynd15	9.55875	8.44852	10.3458	10.0061	-2.1588	Cluster 4	zinc finger, MYND-type containing 15
1459861_s_at	Kdm2b /// OTTMUSG00000006609	11.9251	10.8115	11.8134	11.6337	-2.16385	Cluster 4	lysine (K)-specific demethylase 2B
1451160_s_at	Pvr	8.85137	7.73352	9.20207	9.30053	-2.17024	Cluster 4	poliovirus receptor
1428347_at	Cyfip2	9.32267	8.20274	9.23228	9.12712	-2.17336	Cluster 4	cytoplasmic FMR1 interacting protein 2
1449731_s_at	Nfkbia	12.2269	11.1065	12.2286	11.9277	-2.17408	Cluster 4	nuclear factor of kappa light polypeptide gene enhancer in B-cells inhibitor, alpha
1436078_at	Fcho1	8.28624	7.16534	8.1399	8.03519	-2.17483	Cluster 4	FCH domain only 1
1441727_s_at	Zfp467	8.24325	7.12124	8.14235	8.18678	-2.17649	Cluster 4	zinc finger protein 467
1426411_a_at	Strbp	7.40712	6.28356	7.63741	7.6366	-2.17883	Cluster 4	spermatid perinuclear RNA binding protein
1447946_at	Adam23	7.45232	6.32866	7.91861	7.00017	-2.17899	Cluster 4	a disintegrin and metallopeptidase domain 23
1456288_at	Slfn5	7.94185	6.81797	7.55708	7.92354	-2.17933	Cluster 4	schlafen 5
1426750_at	Flnb	7.88629	6.76208	8.21264	8.52953	-2.17983	Cluster 4	filamin, beta
1419331_at	Cdh17	7.05156	5.92203	7.10681	6.78899	-2.18788	Cluster 4	cadherin 17
1448576_at	Il7r	7.62345	6.4908	8.41059	8.60721	-2.19261	Cluster 4	interleukin 7 receptor
1418280_at	Klf6	8.8557	7.72217	8.90646	8.63849	-2.19395	Cluster 4	Kruppel-like factor 6
1430744_at	Napsa	9.38587	8.25225	9.13245	9.12801	-2.19408	Cluster 4	napsin A aspartic peptidase
1448698_at	Ccnd1	12.2752	11.1392	11.8558	12.1335	-2.19775	Cluster 4	cyclin D1
1448575_at	Il7r	10.5799	9.44282	11.5287	11.1464	-2.19935	Cluster 4	interleukin 7 receptor
1456498_at	Itga4	9.49295	8.35057	9.61687	8.92592	-2.20745	Cluster 4	integrin alpha 4
1444426_at	Cass4	9.59054	8.44809	9.4118	9.22334	-2.20756	Cluster 4	Cas scaffolding protein family member 4
1433639_at	Fam117a	9.20576	8.063	8.86058	8.96617	-2.20805	Cluster 4	family with sequence similarity 117, memberA
1454838_s_at	Pkdcc	7.90641	6.76004	7.85094	7.69262	-2.21356	Cluster 4	protein kinase domain containing, cytoplasmic
1423520_at	Lmnb1	7.96802	6.82149	7.53137	7.77969	-2.21381	Cluster 4	lamin B1
1423466_at	Ccr7	10.7629	9.61393	11.6226	11.6445	-2.21762	Cluster 4	chemokine (C-C motif) receptor 7
1437067_at	Phtf2	8.67039	7.5178	8.81529	8.62928	-2.22312	Cluster 4	putative homeodomain transcription factor 2
1456440_s_at	St8sia6	7.4894	6.32519	7.8331	7.34851	-2.2411	Cluster 4	ST8 alpha-N-acetyl-neuraminide alpha-2,8-sialyltransferase 6
1427962_at	Ccdc102a	9.6308	8.46609	9.24794	9.36997	-2.24188	Cluster 4	coiled-coil domain containing 102A
1424568_at	Tspan2	8.64176	7.47637	8.36892	8.26487	-2.24293	Cluster 4	tetraspanin 2
1433768_at	Palld	8.68133	7.51535	8.72381	8.2161	-2.24385	Cluster 4	palladin, cytoskeletal associated protein
1428444_at	Asb2	10.0786	8.89128	10.0717	10.5069	-2.27725	Cluster 4	ankyrin repeat and SOCS box-containing 2
1418030_at	Slco3a1	9.16195	7.9736	8.80077	8.89197	-2.27892	Cluster 4	solute carrier organic anion transporter family, member 3a1
1423614_at	Lrrc8c	9.39652	8.20409	9.05367	9.18442	-2.28537	Cluster 4	leucine rich repeat containing 8 family, member C
1426994_at	Phlpp	9.98248	8.78992	9.98685	9.74978	-2.28557	Cluster 4	PH domain and leucine rich repeat protein phosphatase 1
1451134_a_at	Tm2d2	10.4284	9.22879	9.89084	10.2272	-2.29673	Cluster 4	TM2 domain containing 2
1437176_at	AI451557	10.593	9.39122	11.1456	10.5315	-2.30027	Cluster 4	NLR family, CARD domain containing 5
1429520_a_at	Acer3	8.70965	7.50526	8.52685	8.6489	-2.3044	Cluster 4	alkaline ceramidase 3
1452198_at	Kdm2b	10.5376	9.33253	10.5138	10.3008	-2.3054	Cluster 4	lysine (K)-specific demethylase 2B
1418718_at	Cxcl16	11.7464	10.5372	11.7846	11.9193	-2.31223	Cluster 4	chemokine (C-X-C motif) ligand 16
1435058_x_at	Stxbp3a	7.66965	6.45991	7.84125	7.32204	-2.31296	Cluster 4	syntaxin binding protein 3A
1435580_at	C230081A13Rik	8.39394	7.18245	8.8561	8.37384	-2.31577	Cluster 4	RIKEN cDNA C230081A13 gene
1427228_at	Palld	9.53219	8.31662	9.34529	9.20609	-2.32232	Cluster 4	palladin, cytoskeletal associated protein
1454806_at	Fam49a	9.2323	8.01586	10.3504	9.60863	-2.32373	Cluster 4	family with sequence similarity 49, member A
1442233_at		7.71918	6.49703	8.1339	7.70791	-2.33295	Cluster 4	---
1437152_at	Mex3b	7.62835	6.40618	7.70473	7.60801	-2.33298	Cluster 4	mex3 homolog B (C. elegans)
1418126_at	Ccl5	11.7026	10.4784	12.4068	11.5163	-2.33625	Cluster 4	chemokine (C-C motif) ligand 5
1419530_at	Il12b	8.71622	7.49147	9.26629	9.31331	-2.33714	Cluster 4	interleukin 12b
1433453_a_at	Abtb2	8.68022	7.45458	9.27221	8.87243	-2.33858	Cluster 4	ankyrin repeat and BTB (POZ) domain containing 2
1435571_at	Mpzl3	8.74972	7.51821	8.25524	8.51927	-2.34814	Cluster 4	myelin protein zero-like 3
1429549_at	Col27a1	8.40092	7.16792	8.45313	7.90434	-2.35056	Cluster 4	collagen, type XXVII, alpha 1
1424852_at	Mef2c	10.1409	8.90632	10.1514	9.65871	-2.35312	Cluster 4	myocyte enhancer factor 2C
1422562_at	Rrad	8.44283	7.19853	8.30516	8.60843	-2.36903	Cluster 4	Ras-related associated with diabetes
1422631_at	Ahr	10.8634	9.60839	10.9895	11.1009	-2.38673	Cluster 4	aryl-hydrocarbon receptor
1415829_at	Lbr	10.8403	9.5846	10.8226	10.7626	-2.38783	Cluster 4	lamin B receptor
1421073_a_at	Ptger4	6.5251	5.26795	6.21286	6.75605	-2.39024	Cluster 4	prostaglandin E receptor 4 (subtype EP4)
1435292_at	Tbc1d4	9.7497	8.49079	9.88217	9.33143	-2.39315	Cluster 4	TBC1 domain family, member 4
1438435_at	Acer3	9.61526	8.35267	9.70775	9.54645	-2.39926	Cluster 4	alkaline ceramidase 3
1448050_s_at	Map4k4	9.72935	8.46571	9.60611	9.27701	-2.40101	Cluster 4	mitogen-activated protein kinase kinase kinase kinase 4
1422592_at	Ctnnd2 /// LOC100045979	7.82827	6.55751	7.76883	7.99336	-2.41289	Cluster 4	catenin (cadherin associated protein), delta 2
1460419_a_at	Prkcb	10.325	9.04666	10.9431	10.7701	-2.42559	Cluster 4	protein kinase C, beta
1435758_at		8.01304	6.73242	8.06088	8.04071	-2.42944	Cluster 4	UDP-Gal:betaGlcNAc beta 1,4-galactosyltransferase, polypeptide 6
1457270_at	Gas7	7.92811	6.64645	8.19156	7.2553	-2.43118	Cluster 4	growth arrest specific 7
1442465_s_at	Strbp	8.48392	7.1899	8.40036	8.49092	-2.4521	Cluster 4	spermatid perinuclear RNA binding protein
1416796_at	LOC100044475 /// Nck2	9.78888	8.48949	9.61877	9.38783	-2.46125	Cluster 4	non-catalytic region of tyrosine kinase adaptor protein 2
1452291_at	Arap2	8.42777	7.12813	10.2432	9.69057	-2.46168	Cluster 4	ArfGAP with RhoGAP domain, ankyrin repeat and PH domain 2
1449195_s_at	Cxcl16	10.9344	9.63351	11.0527	11.2252	-2.46376	Cluster 4	chemokine (C-X-C motif) ligand 16
1426112_a_at	Cd72	9.07925	7.77593	9.21576	8.96053	-2.46797	Cluster 4	CD72 antigen
1437226_x_at	Marcksl1	10.703	9.39715	11.6393	11.5807	-2.47223	Cluster 4	MARCKS-like 1
1448005_at	Sash1	9.29501	7.98867	9.07058	9.1475	-2.47314	Cluster 4	SAM and SH3 domain containing 1
1415971_at	Marcks	11.7969	10.489	12.0197	11.7296	-2.47579	Cluster 4	myristoylated alanine rich protein kinase C substrate
1419538_at	Flt3	12.0801	10.7679	11.6901	11.8557	-2.4832	Cluster 4	FMS-like tyrosine kinase 3
1449273_at	Cyfip2	9.08782	7.77337	9.01665	8.9077	-2.48707	Cluster 4	cytoplasmic FMR1 interacting protein 2
1448713_at	Stat4	8.67127	7.35676	9.63701	9.56479	-2.48718	Cluster 4	signal transducer and activator of transcription 4
1449858_at	Cd86	10.9839	9.66927	10.7118	10.6327	-2.48741	Cluster 4	CD86 antigen
1423566_a_at	Hsph1	8.62804	7.31171	7.92045	9.33958	-2.4903	Cluster 4	heat shock 105kDa/110kDa protein 1
1449363_at	Atf3	10.9717	9.65458	10.9803	10.8681	-2.49172	Cluster 4	activating transcription factor 3
1435879_at	Akt3	9.69112	8.37365	9.32909	9.54336	-2.4923	Cluster 4	thymoma viral proto-oncogene 3
1452408_at	Trex1	6.51478	5.19582	6.76137	6.38763	-2.49486	Cluster 4	---
1456147_at	St8sia6	9.12343	7.80417	9.60773	9.27716	-2.49537	Cluster 4	ST8 alpha-N-acetyl-neuraminide alpha-2,8-sialyltransferase 6
1448325_at	Myd116	10.4759	9.15575	10.4199	10.2393	-2.49693	Cluster 4	protein phosphatase 1, regulatory (inhibitor) subunit 15A
1418128_at	Adcy6	9.86992	8.54872	10.1945	9.78451	-2.49873	Cluster 4	adenylate cyclase 6
1444103_at	Epsti1	7.61624	6.29467	7.632	7.38853	-2.49938	Cluster 4	Epithelial stromal interaction 1 (breast)
1455869_at		12.434	11.1093	12.4625	12.1914	-2.5048	Cluster 4	---
1415922_s_at	Marcksl1	9.60337	8.27536	10.5428	10.3241	-2.51057	Cluster 4	MARCKS-like 1
1426543_x_at	Endod1	8.75016	7.41449	8.00288	8.60535	-2.52393	Cluster 4	endonuclease domain containing 1
1442222_at	Ifnar1	7.97937	6.63955	7.95038	7.46331	-2.5312	Cluster 4	interferon (alpha and beta) receptor 1
1434875_a_at	Hmgn3	11.2537	9.91379	11.1722	10.9457	-2.53131	Cluster 4	high mobility group nucleosomal binding domain 3
1424254_at	Ifitm1	7.83216	6.49049	9.0975	9.42181	-2.53445	Cluster 4	interferon induced transmembrane protein 1
1446930_at		7.69749	6.35228	7.95641	7.87894	-2.54066	Cluster 4	---
1418402_at	Adam19 /// LOC100045780	10.2929	8.94587	10.5148	9.91579	-2.54393	Cluster 4	a disintegrin and metallopeptidase domain 19 (meltrin beta)
1456212_x_at	Socs3	10.6312	9.28039	11.397	11.0299	-2.55047	Cluster 4	suppressor of cytokine signaling 3
1434260_at	Fchsd2	10.9924	9.6411	10.5868	10.7907	-2.55139	Cluster 4	FCH and double SH3 domains 2
1437356_at	Gpr183	10.4119	9.05574	10.6742	11.244	-2.55996	Cluster 4	G protein-coupled receptor 183
1418394_a_at	Cd97	12.0706	10.7099	11.7977	11.7574	-2.56801	Cluster 4	CD97 antigen
1448233_at	Prnp	9.4997	8.13582	10.2229	9.98181	-2.57376	Cluster 4	prion protein
1436230_at	Gpr114	9.91538	8.54609	9.43593	9.88125	-2.58343	Cluster 4	G protein-coupled receptor 114
1417164_at	Dusp10	7.96562	6.59407	7.14292	7.82555	-2.58749	Cluster 4	dual specificity phosphatase 10
1435330_at	BC094916 /// LOC100048304 /// LOC637605 /// Pyhin1	11.3292	9.95368	11.4774	10.9359	-2.59469	Cluster 4	pyrin and HIN domain family, member 1
1429682_at	Fam46c	8.29091	6.9139	8.20557	8.83705	-2.59728	Cluster 4	family with sequence similarity 46, member C
1426541_a_at	Endod1	9.90148	8.51839	9.26231	9.75633	-2.60826	Cluster 4	endonuclease domain containing 1
1431777_a_at	Hmgn3	9.90869	8.52372	9.85819	9.88084	-2.61166	Cluster 4	high mobility group nucleosomal binding domain 3
1429196_at	Rabgap1l	10.3975	9.00921	10.2039	10.0421	-2.61777	Cluster 4	RAB GTPase activating protein 1-like
1456028_x_at	Marcks	10.5968	9.20732	10.5338	10.2186	-2.61982	Cluster 4	myristoylated alanine rich protein kinase C substrate
1422924_at	Tnfsf9	8.079	6.68672	7.98706	8.75887	-2.62495	Cluster 4	tumor necrosis factor (ligand) superfamily, member 9
1417256_at	Mmp13	6.63218	5.23781	7.53019	7.17077	-2.62873	Cluster 4	matrix metallopeptidase 13
1456700_x_at	Marcks	12.7056	11.3024	12.9286	12.4027	-2.64493	Cluster 4	myristoylated alanine rich protein kinase C substrate
1438975_x_at	Zdhhc14	9.7798	8.37353	9.60616	9.63025	-2.65051	Cluster 4	zinc finger, DHHC domain containing 14
1450750_a_at	Nr4a2	7.58419	6.17545	7.5505	7.5978	-2.65505	Cluster 4	nuclear receptor subfamily 4, group A, member 2
1459973_x_at	Dpp4	10.1017	8.68889	9.82048	9.81405	-2.66261	Cluster 4	dipeptidylpeptidase 4
1429168_at	Zbtb46	9.75145	8.33705	9.26774	9.62771	-2.66548	Cluster 4	zinc finger and BTB domain containing 46
1428902_at	Chst11	9.52983	8.11323	9.25074	9.3255	-2.66955	Cluster 4	carbohydrate sulfotransferase 11
1448021_at		10.5075	9.08104	10.5506	11.022	-2.68785	Cluster 4	family with sequence similarity 46, member C
1421027_a_at	Mef2c	9.19193	7.76177	9.40528	9.00927	-2.69477	Cluster 4	myocyte enhancer factor 2C
1436913_at	Cdc14a	10.246	8.81474	9.74207	10.0198	-2.69673	Cluster 4	CDC14 cell division cycle 14 homolog A (S. cerevisiae)
1419297_at	H2-Oa	11.3933	9.95995	11.098	11.2102	-2.70068	Cluster 4	histocompatibility 2, O region alpha locus
1454809_at	Ncoa7	10.3638	8.92964	10.8434	10.137	-2.70221	Cluster 4	nuclear receptor coactivator 7
1422615_at	Map4k4	9.23174	7.7907	9.21467	8.60871	-2.71517	Cluster 4	mitogen-activated protein kinase kinase kinase kinase 4
1438439_at	Gpr171	11.0948	9.63304	11.2745	11.0729	-2.75447	Cluster 4	G protein-coupled receptor 171
1416072_at	Cd34	7.19915	5.72463	7.07293	7.13403	-2.77892	Cluster 4	CD34 antigen
1438619_x_at	Zdhhc14	10.0191	8.54107	9.94607	9.80602	-2.78575	Cluster 4	zinc finger, DHHC domain containing 14
1455318_at	Timd4	9.80968	8.32561	9.62614	9.48756	-2.79737	Cluster 4	T-cell immunoglobulin and mucin domain containing 4
1460239_at	Tspan13	10.5894	9.1053	10.4082	11.0681	-2.79738	Cluster 4	tetraspanin 13
1448890_at	Klf2	10.4328	8.93679	10.4573	9.83986	-2.82061	Cluster 4	Kruppel-like factor 2 (lung)
1440275_at	Runx3	9.73465	8.23445	9.76929	9.84325	-2.82883	Cluster 4	runt related transcription factor 3
1424303_at	Depdc7	8.72102	7.21997	8.50631	9.24007	-2.83048	Cluster 4	DEP domain containing 7
1457108_at		7.89543	6.38999	7.52469	7.85581	-2.83913	Cluster 4	---
1454850_at	Tbc1d10c	9.80548	8.29492	9.55043	9.29397	-2.84922	Cluster 4	TBC1 domain family, member 10c
1437614_x_at	Zdhhc14	9.74798	8.22959	9.57208	9.47119	-2.86471	Cluster 4	zinc finger, DHHC domain containing 14
1450698_at	Dusp2	9.364	7.83849	9.28767	9.28628	-2.87889	Cluster 4	dual specificity phosphatase 2
1431008_at	0610037M15Rik	12.4841	10.9492	12.6387	12.0255	-2.89783	Cluster 4	histocompatibility 2, Q region locus 6 /// histocompatibility 2, Q region locus 6-like
1435465_at	Kbtbd11	12.1974	10.6597	11.7557	11.8067	-2.90343	Cluster 4	kelch repeat and BTB (POZ) domain containing 11
1429197_s_at	Rabgap1l	9.20624	7.65761	9.04637	8.81314	-2.92539	Cluster 4	RAB GTPase activating protein 1-like
1441894_s_at	Grasp	11.6843	10.1336	11.9248	11.4376	-2.92952	Cluster 4	GRP1 (general receptor for phosphoinositides 1)-associated scaffold protein
1438316_a_at	Ccdc102a	9.20746	7.65234	8.60771	9.10164	-2.93857	Cluster 4	coiled-coil domain containing 102A
1455899_x_at	Socs3	11.4755	9.91704	12.1521	11.9572	-2.94546	Cluster 4	suppressor of cytokine signaling 3
1450276_a_at	Scin	8.55244	6.99223	9.58101	9.28374	-2.94897	Cluster 4	scinderin
1416996_at	Tbc1d8	11.4123	9.85136	11.2284	11.0416	-2.95049	Cluster 4	TBC1 domain family, member 8
1422018_at	Hivep2	8.9806	7.41101	8.58803	9.22837	-2.96821	Cluster 4	human immunodeficiency virus type I enhancer binding protein 2
1428579_at	Fmnl2	11.2963	9.7072	11.3905	11.0383	-3.00861	Cluster 4	formin-like 2
1447863_s_at	Nr4a2	8.7318	7.14059	8.81573	9.08837	-3.01303	Cluster 4	nuclear receptor subfamily 4, group A, member 2
1451644_a_at	0610037M15Rik /// H2-gs10	7.19592	5.60362	7.71899	6.47552	-3.0153	Cluster 4	MHC class I like protein GS10 /// histocompatibility 2, Q region locus 6 /// histocompatibility 2, Q region locus 6-like
1423059_at	Ptk2	8.51232	6.91967	8.17429	8.46795	-3.01604	Cluster 4	PTK2 protein tyrosine kinase 2
1430419_at	2310031A07Rik	8.89602	7.28068	9.00152	8.10863	-3.06385	Cluster 4	RIKEN cDNA 2310031A07 gene
1452815_at	P2ry10	12.3425	10.7268	11.936	12.0189	-3.06469	Cluster 4	purinergic receptor P2Y, G-protein coupled 10
1435331_at	LOC100048304 /// Pyhin1	10.694	9.06146	10.7218	10.1242	-3.10063	Cluster 4	pyrin and HIN domain family, member 1
1437667_a_at	Bach2	8.56533	6.92755	8.60308	8.42452	-3.11188	Cluster 4	BTB and CNC homology 2
1431213_a_at	LOC433762	11.7851	10.1418	11.8948	11.4479	-3.1238	Cluster 4	predicted gene 3579
1415972_at	Marcks	9.2113	7.562	9.39514	8.84648	-3.13682	Cluster 4	myristoylated alanine rich protein kinase C substrate
1415973_at	Marcks	11.8206	10.1705	12.18	11.375	-3.13852	Cluster 4	myristoylated alanine rich protein kinase C substrate
1434339_at	Fnbp1l	11.3663	9.71392	11.2941	10.8783	-3.14347	Cluster 4	formin binding protein 1-like
1448265_x_at	Mpzl2	6.84546	5.18838	6.33028	6.40742	-3.15377	Cluster 4	myelin protein zero-like 2
1421057_at	Dnase1l3	8.03748	6.35315	8.37953	8.49633	-3.21391	Cluster 4	deoxyribonuclease 1-like 3
1441887_x_at	EG622976	10.2545	8.5556	10.0026	9.91445	-3.24657	Cluster 4	predicted gene 6377
1455418_at		8.63785	6.93732	8.51957	8.33335	-3.2502	Cluster 4	---
1418643_at	Tspan13	11.7418	10.0318	11.5013	11.9951	-3.27157	Cluster 4	tetraspanin 13
1418203_at	Pmaip1	11.6719	9.94278	12.1579	11.5088	-3.31516	Cluster 4	phorbol-12-myristate-13-acetate-induced protein 1
1418715_at	Pank1	8.26298	6.51299	7.52306	7.93609	-3.36358	Cluster 4	pantothenate kinase 1
1452543_a_at	Scgb1a1	8.80985	7.05604	9.05369	8.26025	-3.37248	Cluster 4	secretoglobin, family 1A, member 1 (uteroglobin)
1436515_at	Bach2	8.45115	6.68827	8.38328	8.00554	-3.39375	Cluster 4	BTB and CNC homology 2
1434716_at	Havcr1	8.78869	7.01797	8.76948	8.49721	-3.41226	Cluster 4	hepatitis A virus cellular receptor 1
1455077_a_at	Morf4l1	12.8752	11.1	12.9132	12.9808	-3.42276	Cluster 4	RIKEN cDNA A730098P11 gene /// mortality factor 4 like 1
1437395_at	Zcchc11	9.30894	7.49952	9.12929	8.82656	-3.50501	Cluster 4	zinc finger, CCHC domain containing 11
1417483_at	Nfkbiz	10.1953	8.34044	10.3727	10.0406	-3.61728	Cluster 4	nuclear factor of kappa light polypeptide gene enhancer in B-cells inhibitor, zeta
1445534_at	Flnb	7.72863	5.77584	7.82916	7.70387	-3.87121	Cluster 4	Filamin, beta
1416236_a_at	Mpzl2	8.78212	6.81734	8.18378	8.21713	-3.90353	Cluster 4	myelin protein zero-like 2
1460245_at	Klrd1	12.0338	10.0519	11.5401	11.7141	-3.95008	Cluster 4	killer cell lectin-like receptor, subfamily D, member 1
1417714_x_at	Hba-a1 /// Hba-a2	7.6675	5.58539	7.61995	7.58203	-4.23426	Cluster 4	hemoglobin alpha, adult chain 1 /// hemoglobin alpha, adult chain 2
1417184_s_at	Hbb-b1 /// Hbb-b2	11.3131	8.99065	11.2042	11.1395	-5.0017	Cluster 4	hemoglobin, beta adult major chain /// hemoglobin, beta adult minor chain /// hemoglobin subunit beta-1-like
1428361_x_at	Hba-a1 /// Hba-a2	12.9155	10.5144	12.8867	12.8624	-5.28195	Cluster 4	hemoglobin alpha, adult chain 1 /// hemoglobin alpha, adult chain 2
1455034_at	Nr4a2	8.69204	6.01787	8.30865	8.50507	-6.38272	Cluster 4	nuclear receptor subfamily 4, group A, member 2
1452757_s_at	Hba-a1 /// Hba-a2	11.8329	8.81947	11.8346	11.8455	-8.07466	Cluster 4	hemoglobin alpha, adult chain 1 /// hemoglobin alpha, adult chain 2
1452318_a_at	Hspa1b	12.7382	9.65273	12.1159	12.9926	-8.48832	Cluster 4	heat shock protein 1B
1427126_at	Hspa1b	11.4216	8.05707	10.8131	11.8429	-10.2999	Cluster 4	heat shock protein 1B
1452388_at	Hspa1a	11.1503	7.73757	10.901	11.2438	-10.6495	Cluster 4	heat shock protein 1A
1427127_x_at	Hspa1b	11.7274	8.28782	11.098	11.9472	-10.8497	Cluster 4	heat shock protein 1B
1440084_at		6.33879	5.33715	5.85732	5.53388	-2.00227	Cluster 5	---
1446722_at		9.92424	8.92011	9.81465	9.43597	-2.00573	Cluster 5	---
1460231_at	Irf5	11.4433	10.4377	11.1587	11.0808	-2.00781	Cluster 5	interferon regulatory factor 5
1452411_at	Lrrc1	8.59502	7.58667	8.08622	8.06415	-2.0116	Cluster 5	leucine rich repeat containing 1
1434930_at	Tpcn1	8.25517	7.24387	8.06311	7.85163	-2.01572	Cluster 5	two pore channel 1
1432409_at	Prkar2a	6.98825	5.97657	6.2765	6.66087	-2.01625	Cluster 5	protein kinase, cAMP dependent regulatory, type II alpha
1434881_s_at	Kctd12	12.8119	11.7992	12.4549	11.8022	-2.01771	Cluster 5	potassium channel tetramerisation domain containing 12
1435926_at	Chml	9.72673	8.71255	9.38666	9.3984	-2.01975	Cluster 5	choroideremia-like
1454896_at	Rbpj	13.1347	12.1201	12.6952	12.4914	-2.02034	Cluster 5	recombination signal binding protein for immunoglobulin kappa J region
1446802_at	Atox1	10.0873	9.06834	9.53842	9.31536	-2.02651	Cluster 5	ATX1 (antioxidant protein 1) homolog 1 (yeast)
1435955_at	Siglecg	8.71604	7.69694	8.46975	8.28761	-2.02665	Cluster 5	sialic acid binding Ig-like lectin G
1418926_at	Zeb1	10.3791	9.3582	10.0198	10.0103	-2.02917	Cluster 5	zinc finger E-box binding homeobox 1
1440609_at	Map4k4	9.0396	8.01858	8.78908	8.44966	-2.02935	Cluster 5	mitogen-activated protein kinase kinase kinase kinase 4
1455735_at	Ap1s3	6.53854	5.51728	5.93941	6.31473	-2.02969	Cluster 5	adaptor-related protein complex AP-1, sigma 3
1435176_a_at	Id2	13.5471	12.5232	12.9872	12.9158	-2.03341	Cluster 5	inhibitor of DNA binding 2
1446318_at		6.62108	5.59679	6.46668	5.88327	-2.03395	Cluster 5	---
1439926_at	Heg1	6.29538	5.2668	5.74167	5.572	-2.04002	Cluster 5	HEG homolog 1 (zebrafish)
1436181_at	Ddef2	7.20622	6.17584	6.79671	6.93851	-2.04256	Cluster 5	ArfGAP with SH3 domain, ankyrin repeat and PH domain 2
1430131_at	Cr1l	5.96169	4.92911	5.6024	5.35154	-2.04568	Cluster 5	complement component (3b/4b) receptor 1-like
1429209_at	Col23a1	7.55571	6.52168	6.69227	7.02593	-2.04774	Cluster 5	collagen, type XXIII, alpha 1
1427878_at	0610010O12Rik	10.0862	9.05142	9.4062	9.42081	-2.04887	Cluster 5	RIKEN cDNA 0610010O12 gene
1434580_at	Enpp4	8.84624	7.80623	8.39625	8.06077	-2.05625	Cluster 5	ectonucleotide pyrophosphatase/phosphodiesterase 4
1435327_at	Lpgat1	10.2539	9.21124	9.81551	9.68313	-2.05995	Cluster 5	lysophosphatidylglycerol acyltransferase 1
1439672_at		8.73946	7.69536	8.49992	7.7312	-2.06208	Cluster 5	---
1455176_a_at	Syt11	6.70965	5.66367	6.15789	6.3994	-2.06476	Cluster 5	synaptotagmin XI
1429097_at	C030044C12Rik	8.9664	7.91833	8.49702	8.29526	-2.06777	Cluster 5	ring finger protein 150
1425333_at	Rab43	12.0744	11.0248	11.5845	11.6421	-2.06995	Cluster 5	RAB43, member RAS oncogene family
1437493_at	5230400M03Rik	8.21152	7.16088	7.87321	7.49883	-2.07145	Cluster 5	RIKEN cDNA 5230400M03 gene /// hypothetical LOC100502767
1417065_at	Egr1	13.584	12.5332	13.0741	12.8304	-2.07158	Cluster 5	early growth response 1
1416188_at	Gm2a	9.88941	8.83683	9.46033	9.48873	-2.07423	Cluster 5	GM2 ganglioside activator protein
1433759_at	Dpy19l1	10.7916	9.7386	10.348	10.4081	-2.07487	Cluster 5	dpy-19-like 1 (C. elegans)
1439768_x_at	Sema4f	8.72652	7.67267	8.14149	8.27008	-2.07605	Cluster 5	sema domain, immunoglobulin domain (Ig), TM domain, and short cytoplasmic domain
1436984_at	Abi2	8.55979	7.50466	7.93885	8.10025	-2.0779	Cluster 5	abl-interactor 2
1452231_x_at	Ifi203	13.2013	12.1448	12.7314	12.7252	-2.07997	Cluster 5	myeloid nuclear differentiation antigen like
1450649_at	Gng10	13.1598	12.1009	12.5215	12.6533	-2.08342	Cluster 5	guanine nucleotide binding protein (G protein), gamma 10
1444340_at	C230066G23Rik	7.4433	6.37339	7.24238	6.57203	-2.0993	Cluster 5	RIKEN cDNA C230066G23 gene
1416811_s_at	Ctla2a /// Ctla2b	6.38504	5.30966	6.06753	5.59381	-2.10727	Cluster 5	cytotoxic T lymphocyte-associated protein 2 alpha /// cytotoxic T lymphocyte-associated protein 2 beta
1457265_at	Sfrs17b	8.26357	7.18601	7.75509	7.35296	-2.11046	Cluster 5	A kinase (PRKA) anchor protein 17B
1426906_at	Ifi203	12.7303	11.6521	12.289	12.1295	-2.11153	Cluster 5	myeloid nuclear differentiation antigen like
1418840_at	Pdcd4	10.6205	9.54191	10.7595	9.93405	-2.11199	Cluster 5	programmed cell death 4
1448957_at	Rbpj	10.8926	9.81307	10.2621	10.0847	-2.1133	Cluster 5	recombination signal binding protein for immunoglobulin kappa J region
1430633_s_at	C430045I18Rik	9.2142	8.13313	8.74134	8.4068	-2.11561	Cluster 5	RIKEN cDNA C430045I18 gene
1438397_a_at	Rbm39	9.47981	8.39106	9.25116	8.25493	-2.1269	Cluster 5	RNA binding motif protein 39
1431469_a_at	Cxxc5	7.90608	6.81651	7.4896	7.05796	-2.1281	Cluster 5	CXXC finger 5
1435521_at	Msi2	7.66459	6.57049	7.54997	7.10734	-2.13481	Cluster 5	Musashi homolog 2 (Drosophila)
1438895_at	A430102J17Rik	8.69065	7.59616	8.67291	7.39697	-2.13536	Cluster 5	RIKEN cDNA A430102J17 gene
1441185_at	Msi2	7.4888	6.38858	7.29401	6.81744	-2.14388	Cluster 5	Musashi homolog 2 (Drosophila)
1428975_at	Susd3	8.32412	7.22305	7.76859	8.06852	-2.14513	Cluster 5	sushi domain containing 3
1447242_at		8.04939	6.94449	7.94229	7.5485	-2.15084	Cluster 5	---
1457528_at	Slc4a7	8.80245	7.69381	8.52625	7.63243	-2.15641	Cluster 5	solute carrier family 4, sodium bicarbonate cotransporter, member 7
1428744_s_at	Bri3bp	11.3539	10.2422	10.5343	11.1666	-2.16098	Cluster 5	Bri3 binding protein
1428097_at	2510009E07Rik	10.7767	9.66356	9.98603	10.1797	-2.16315	Cluster 5	RIKEN cDNA 2510009E07 gene
1429246_a_at	Anxa6	8.64135	7.52306	7.88773	8.22039	-2.1709	Cluster 5	annexin A6
1444275_at		5.70759	4.58918	5.05881	4.96801	-2.17107	Cluster 5	---
1457376_at		8.40541	7.28432	8.47823	7.47016	-2.17512	Cluster 5	---
1426452_a_at	Rab30	9.11173	7.98953	8.61563	8.56065	-2.1768	Cluster 5	RAB30, member RAS oncogene family
1455549_at	Sestd1	9.08447	7.96155	8.56002	8.191	-2.17786	Cluster 5	SEC14 and spectrin domains 1
1443435_at		7.79296	6.66807	7.14621	6.97615	-2.18084	Cluster 5	---
1428743_at	Bri3bp	9.39029	8.25714	8.73854	8.95408	-2.19337	Cluster 5	Bri3 binding protein
1425514_at	Pik3r1	9.45463	8.31571	9.17608	9.05226	-2.20215	Cluster 5	phosphatidylinositol 3-kinase, regulatory subunit, polypeptide 1 (p85 alpha)
1421628_at	Il18r1	8.67802	7.53826	8.51175	7.37427	-2.20343	Cluster 5	interleukin 18 receptor 1
1453069_at	Pik3cb	9.93546	8.79556	9.29922	9.35726	-2.20367	Cluster 5	phosphatidylinositol 3-kinase, catalytic, beta polypeptide
1438805_at	Ccnd3	8.26406	7.1221	7.81229	7.21884	-2.2068	Cluster 5	cyclin D3
1448918_at	Slco3a1	9.64416	8.50194	9.05423	9.29258	-2.2072	Cluster 5	solute carrier organic anion transporter family, member 3a1
1449303_at	Sesn3	9.08284	7.93118	8.91093	8.57136	-2.22169	Cluster 5	Sestrin 3
1447213_at		9.93532	8.78247	9.49189	8.88785	-2.22352	Cluster 5	---
1417060_at	Ppp1r11	9.7249	8.57193	8.95031	8.99427	-2.22371	Cluster 5	protein phosphatase 1, regulatory (inhibitor) subunit 11
1433645_at	Slc44a1	10.8902	9.73482	10.6702	10.0848	-2.22735	Cluster 5	solute carrier family 44, member 1
1452222_at	Utrn	9.98179	8.82507	9.56001	9.23295	-2.2295	Cluster 5	utrophin
1452349_x_at	Ifi205 /// Mnda	13.5478	12.3909	13.08	13.1315	-2.22977	Cluster 5	interferon activated gene 205 /// myeloid cell nuclear differentiation antigen
1441331_at	A230061C15Rik	9.66663	8.50714	9.38604	8.79087	-2.23377	Cluster 5	RIKEN cDNA A230061C15 gene
1457304_at	D13Ertd787e	7.97913	6.81767	7.41097	7.1419	-2.23682	Cluster 5	DNA segment, Chr 13, ERATO Doi 787, expressed
1438802_at	Foxp1	8.11788	6.95303	7.79924	7.33057	-2.2421	Cluster 5	Forkhead box P1
1420404_at	Cd86	11.1875	10.0221	10.7923	10.4118	-2.2429	Cluster 5	CD86 antigen
1418057_at	Tiam1	11.5626	10.392	10.9746	10.8473	-2.25113	Cluster 5	T-cell lymphoma invasion and metastasis 1
1453191_at	Col27a1	9.07785	7.90371	8.43857	8.43598	-2.25659	Cluster 5	collagen, type XXVII, alpha 1
1446127_at	Zeb1	8.02053	6.84268	7.59009	7.03807	-2.2624	Cluster 5	Zinc finger E-box binding homeobox 1
1427121_at	Fbxo4	9.29255	8.11417	8.55967	8.64057	-2.26321	Cluster 5	F-box protein 4
1427615_at	Itga4	5.87077	4.69187	5.52573	5.05562	-2.26405	Cluster 5	integrin alpha 4
1451359_at	Lpcat1	10.902	9.72213	10.2809	10.272	-2.26551	Cluster 5	lysophosphatidylcholine acyltransferase 1
1440964_s_at	Cbfa2t3	9.58685	8.40637	9.03705	9.18805	-2.26653	Cluster 5	core-binding factor, runt domain, alpha subunit 2, translocated to, 3 (human)
1416882_at	Rgs10	12.3299	11.1484	11.6669	11.8655	-2.26813	Cluster 5	regulator of G-protein signalling 10
1460688_s_at	Unc119b	11.1719	9.98756	10.3606	10.3458	-2.27258	Cluster 5	unc-119 homolog B (C. elegans)
1440078_at		7.34751	6.16036	6.95187	6.20449	-2.27704	Cluster 5	---
1457398_at		9.76693	8.57877	9.59921	8.82989	-2.27861	Cluster 5	---
1436871_at	Sfrs7	9.79412	8.60507	9.30986	9.14933	-2.28003	Cluster 5	serine/arginine-rich splicing factor 7
1431429_a_at	Arl4a	8.8742	7.68511	8.31604	8.30605	-2.28008	Cluster 5	ADP-ribosylation factor-like 4A
1439218_at		7.85963	6.66025	7.33395	7.06705	-2.2964	Cluster 5	---
1449099_at	Lrba	10.8958	9.69645	10.103	10.1527	-2.29643	Cluster 5	LPS-responsive beige-like anchor
1456661_at		9.17921	7.97636	8.84439	8.03304	-2.30193	Cluster 5	---
1443222_at		6.51781	5.3145	6.21846	6.04896	-2.30268	Cluster 5	---
1441177_at		9.29382	8.08564	8.74654	8.27817	-2.31046	Cluster 5	---
1435260_at	Akt3	8.84811	7.63978	8.49135	8.33697	-2.3107	Cluster 5	thymoma viral proto-oncogene 3
1455732_at	1700025G04Rik	10.3006	9.09003	9.69824	9.84676	-2.31431	Cluster 5	RIKEN cDNA 1700025G04 gene
1450414_at	Pdgfb	8.65653	7.44554	8.31131	7.80589	-2.31497	Cluster 5	platelet derived growth factor, B polypeptide
1449590_a_at	Mras	7.80705	6.59585	7.13985	7.22557	-2.31529	Cluster 5	muscle and microspikes RAS
1424460_s_at	Lpcat1	12.9255	11.7143	12.4435	12.3282	-2.31533	Cluster 5	lysophosphatidylcholine acyltransferase 1
1435222_at	Foxp1	10.275	9.05714	10.1772	9.74731	-2.32596	Cluster 5	forkhead box P1
1440131_at		8.50479	7.28594	7.98118	7.68611	-2.3276	Cluster 5	---
1420824_at	Sema4d	9.97267	8.7502	9.6515	9.49714	-2.33347	Cluster 5	sema domain, immunoglobulin domain (Ig), transmembrane domain (TM) and short cytoplasmic domain, (semaphorin) 4D
1443037_at		9.16617	7.94025	8.82921	8.44007	-2.33905	Cluster 5	---
1438824_at	Slc20a1	8.5275	7.30057	8.07399	7.75754	-2.34068	Cluster 5	solute carrier family 20, member 1
1436191_at	Arid4a	10.0162	8.78863	9.5665	9.4673	-2.34173	Cluster 5	AT rich interactive domain 4A (RBP1-like)
1435959_at	Arhgap15	10.9072	9.67764	10.2442	9.91149	-2.34495	Cluster 5	Rho GTPase activating protein 15
1460203_at	Itpr1	10.9083	9.67831	10.3325	10.0284	-2.34563	Cluster 5	inositol 1,4,5-triphosphate receptor 1
1424588_at	Srgap3	9.79694	8.56533	8.93075	8.9481	-2.34829	Cluster 5	SLIT-ROBO Rho GTPase activating protein 3
1455694_at	Nbeal2	9.51881	8.28074	9.171	8.86667	-2.35884	Cluster 5	neurobeachin-like 2
1436431_at	1700025G04Rik	9.58443	8.34631	9.05196	9.15315	-2.35891	Cluster 5	RIKEN cDNA 1700025G04 gene
1441556_at		10.045	8.80592	9.90375	9.20814	-2.36041	Cluster 5	---
1432962_at	2610024D14Rik	6.93459	5.69081	6.73452	6.16863	-2.36817	Cluster 5	RIKEN cDNA 2610024D14 gene
1438475_at	AB124611	10.0431	8.79322	9.76563	9.26559	-2.37823	Cluster 5	cDNA sequence AB124611
1433920_at	Sema4c	8.46451	7.21132	7.89057	7.32304	-2.38368	Cluster 5	sema domain, immunoglobulin domain (Ig), transmembrane domain (TM) and short cytoplasmic domain, (semaphorin) 4C
1458472_at	4932417H02Rik	7.08362	5.82953	6.37576	6.16219	-2.38516	Cluster 5	regulatory associated protein of MTOR, complex 1
1430585_at	5930436O19Rik	9.36851	8.1107	9.35464	8.55198	-2.39133	Cluster 5	RIKEN cDNA 5930436O19 gene
1439970_at		8.48764	7.22559	8.22203	7.47488	-2.39836	Cluster 5	---
1446245_at		8.68072	7.41458	8.42953	7.86756	-2.40516	Cluster 5	---
1457218_at	Strbp	7.46336	6.19454	7.12291	6.71569	-2.40965	Cluster 5	spermatid perinuclear RNA binding protein
1435064_a_at	Tmem27	6.45429	5.18016	5.8283	5.77977	-2.41854	Cluster 5	transmembrane protein 27
1434537_at	Slco3a1	8.74485	7.47021	8.04621	8.29098	-2.41938	Cluster 5	solute carrier organic anion transporter family, member 3a1
1424229_at	Dyrk3	8.34066	7.06277	7.62903	7.6761	-2.42484	Cluster 5	dual-specificity tyrosine-(Y)-phosphorylation regulated kinase 3
1416697_at	Dpp4	11.4182	10.139	11.0208	10.9099	-2.42692	Cluster 5	dipeptidylpeptidase 4
1438398_at		9.76458	8.47961	9.64801	8.53789	-2.43677	Cluster 5	---
1452769_at	Rnf145	11.6877	10.3975	10.9925	10.7494	-2.44562	Cluster 5	ring finger protein 145
1443649_at		8.04409	6.75379	7.74942	7.09391	-2.44578	Cluster 5	---
1429114_at	Sestd1	8.95794	7.66587	8.34858	8.35466	-2.44879	Cluster 5	SEC14 and spectrin domains 1
1433203_at	6030400A10Rik	7.09762	5.80551	6.39437	6.23897	-2.44885	Cluster 5	RIKEN cDNA 6030400A10 gene
1417279_at	Itpr1	9.28313	7.98869	8.87645	8.6511	-2.45283	Cluster 5	inositol 1,4,5-triphosphate receptor 1
1458700_at		8.70249	7.40482	8.49278	7.96119	-2.45832	Cluster 5	---
1455664_at	Rtn4rl1	7.57606	6.26813	6.43151	6.96217	-2.47585	Cluster 5	reticulon 4 receptor-like 1
1417590_at	Cyp27a1	10.6909	9.37567	10.0483	9.91539	-2.48848	Cluster 5	cytochrome P450, family 27, subfamily a, polypeptide 1
1424463_at	Mfsd6	11.7007	10.3841	11.2026	10.8846	-2.49076	Cluster 5	major facilitator superfamily domain containing 6
1416118_at	Trim59	9.3384	8.01769	8.9526	8.75392	-2.49788	Cluster 5	tripartite motif-containing 59
1426300_at	Alcam	10.8225	9.50062	9.96956	10.2937	-2.49985	Cluster 5	activated leukocyte cell adhesion molecule
1451486_at	Slc46a3	11.1756	9.85076	10.4964	10.7119	-2.50497	Cluster 5	solute carrier family 46, member 3
1421187_at	Ccr2	9.85182	8.52632	9.59676	8.6475	-2.5062	Cluster 5	chemokine (C-C motif) receptor 2
1451905_a_at	Mx1	9.73764	8.41142	9.62042	8.87452	-2.50745	Cluster 5	myxovirus (influenza virus) resistance 1
1443629_at	Nav1	7.19334	5.86621	6.57538	6.38521	-2.50902	Cluster 5	neuron navigator 1
1436037_at	Itga4	11.0072	9.67892	11.0938	10.1565	-2.51108	Cluster 5	integrin alpha 4
1416701_at	Rnd3	8.05865	6.72833	7.29154	7.32804	-2.51459	Cluster 5	Rho family GTPase 3
1444003_at	Neurl3	9.84052	8.50737	9.16911	9.25307	-2.51953	Cluster 5	neuralized homolog 3 homolog (Drosophila)
1449222_at	Ebi3	11.3987	10.0647	10.5991	10.4454	-2.52091	Cluster 5	Epstein-Barr virus induced gene 3
1455080_at	Ppp1r16b	9.29442	7.96035	8.85737	8.80578	-2.52111	Cluster 5	protein phosphatase 1, regulatory (inhibitor) subunit 16B
1425544_at	Plekha5	9.4329	8.09433	8.49236	8.7049	-2.529	Cluster 5	pleckstrin homology domain containing, family A member 5
1439165_at		8.55958	7.21977	8.0111	7.40482	-2.53119	Cluster 5	hypothetical protein LOC100504377
1449282_at	Cysltr1	8.85337	7.51171	8.11101	8.18166	-2.53442	Cluster 5	cysteinyl leukotriene receptor 1
1417995_at	Ptpn22	9.8857	8.53962	9.33986	9.14122	-2.5422	Cluster 5	protein tyrosine phosphatase, non-receptor type 22 (lymphoid)
1453004_at	Slc22a23	9.0594	7.71225	8.85996	8.45279	-2.5441	Cluster 5	solute carrier family 22, member 23
1441172_at		6.99593	5.64741	6.5278	5.65567	-2.54651	Cluster 5	---
1448775_at	Ifi203	10.2698	8.91469	9.51857	9.25396	-2.5581	Cluster 5	interferon activated gene 203
1451567_a_at	Ifi203	11.2261	9.86969	10.5899	10.6035	-2.56049	Cluster 5	interferon activated gene 203 /// interferon-activable protein 203-like
1424567_at	Tspan2	7.57568	6.2171	6.9597	7.1663	-2.56432	Cluster 5	tetraspanin 2
1430163_at	Rab43	9.83722	8.47775	9.34605	9.06247	-2.5659	Cluster 5	RAB43, member RAS oncogene family
1428615_at	P2ry5	10.0449	8.6788	9.61707	9.5618	-2.57765	Cluster 5	lysophosphatidic acid receptor 6
1427981_a_at	Csad	9.08369	7.71463	8.28247	8.08398	-2.58304	Cluster 5	cysteine sulfinic acid decarboxylase
1422537_a_at	Id2	10.9711	9.59843	9.93513	10.0774	-2.58943	Cluster 5	inhibitor of DNA binding 2
1448960_at	Cxxc5	8.49762	7.12164	7.86104	7.62519	-2.59545	Cluster 5	CXXC finger 5
1441373_at		7.20762	5.83104	6.62333	6.38457	-2.59652	Cluster 5	---
1454890_at	Amot	8.19561	6.80599	7.89957	7.71476	-2.62008	Cluster 5	angiomotin
1417218_at	Calhm2	9.34691	7.95168	8.68661	8.66918	-2.63031	Cluster 5	calcium homeostasis modulator 2
1442643_at	Kdm6b	10.2142	8.81806	9.59558	9.67155	-2.63203	Cluster 5	KDM1 lysine (K)-specific demethylase 6B
1441843_s_at	5230400M03Rik	10.2939	8.89726	9.70073	9.10507	-2.6329	Cluster 5	RIKEN cDNA 5230400M03 gene /// hypothetical LOC100502767
1455683_a_at	Tbc1d8	7.97551	6.56669	7.58167	7.47223	-2.6552	Cluster 5	TBC1 domain family, member 8
1423680_at	Fads1	10.094	8.68205	9.61298	9.45661	-2.66098	Cluster 5	fatty acid desaturase 1
1456393_at	2310002J21Rik	11.2485	9.82886	11.2652	10.4971	-2.67524	Cluster 5	non-protein coding RNA 81
1429390_at	Acpl2	8.04766	6.619	7.45718	7.46642	-2.69195	Cluster 5	acid phosphatase-like 2
1419515_at	Fgd2	11.6058	10.1761	10.7763	11.1581	-2.69379	Cluster 5	FYVE, RhoGEF and PH domain containing 2
1456735_x_at	Acpl2	8.69163	7.25886	8.11848	8.19828	-2.69964	Cluster 5	acid phosphatase-like 2
1441069_at	Zdhhc23	10.241	8.80704	9.45237	9.43175	-2.70181	Cluster 5	zinc finger, DHHC domain containing 23
1444992_at	AI120166	7.02685	5.5906	6.4202	5.72839	-2.70617	Cluster 5	expressed sequence AI120166
1457404_at	Nfkbiz	9.1356	7.69216	9.07512	8.48918	-2.7197	Cluster 5	Nuclear factor of kappa light polypeptide gene enhancer in B-cells inhibitor, zeta
1429672_at	5830407E08Rik	7.82948	6.37955	7.33464	7.24999	-2.73194	Cluster 5	RIKEN cDNA 5830407E08 gene
1436631_at	Ctnna1	8.65322	7.19857	7.6904	7.70907	-2.74091	Cluster 5	catenin (cadherin associated protein), alpha 1
1428157_at	Gng2	7.66033	6.20325	7.18136	6.35245	-2.74552	Cluster 5	guanine nucleotide binding protein (G protein), gamma 2
1441545_at	Zcchc11	6.36844	4.91057	5.94639	5.06516	-2.74702	Cluster 5	zinc finger, CCHC domain containing 11
1418741_at	Itgb7	12.4921	11.0313	11.5967	11.5337	-2.75272	Cluster 5	integrin beta 7
1424560_at	Pstpip1	10.0183	8.55645	9.23841	9.05791	-2.75467	Cluster 5	proline-serine-threonine phosphatase-interacting protein 1
1430109_at	4833412E19Rik	7.7181	6.25132	7.66955	6.63392	-2.76404	Cluster 5	RIKEN cDNA 4833412E19 gene
1439205_at	Nfatc2	11.0633	9.58895	10.2034	10.5528	-2.7785	Cluster 5	nuclear factor of activated T-cells, cytoplasmic, calcineurin-dependent 2
1448743_at	Ssx2ip	8.56726	7.09094	7.8296	7.89478	-2.78239	Cluster 5	synovial sarcoma, X breakpoint 2 interacting protein
1445881_at	2310035P21Rik	9.0265	7.54996	8.29442	8.11371	-2.78281	Cluster 5	RIKEN cDNA 2310035P21 gene
1439997_at	Synj1	8.1611	6.68383	7.79065	7.52362	-2.78421	Cluster 5	synaptojanin 1
1442599_at	Slc12a9	8.31599	6.8342	7.35101	7.2754	-2.79296	Cluster 5	solute carrier family 12 (potassium/chloride transporters), member 9
1454884_at	Zbtb46	10.2004	8.71598	9.7065	9.5374	-2.79798	Cluster 5	zinc finger and BTB domain containing 46
1452731_x_at	100041195 /// 100041874 /// 100042164 /// 666442 /// 666637 /// B930046C15Rik /// EG666890 /// ENSMUSG00000063277 /// ENSMUSG00000068790 /// ENSMUSG00000072735 /// LOC100036568 /// LOC100041530 /// LOC671957	6.55308	5.06712	6.06939	5.62344	-2.80102	Cluster 5	predicted gene, ENSMUSG00000068790 /// alpha-takusan pseudogene /// predicted gene 2897 /// alpha-takusan pseudogene /// predicted gene 3373 /// predicted gene 3558 /// predicted gene 3696 /// predicted pseudogene 8348
1438279_at	Dpp4	8.83817	7.34812	8.17527	7.65832	-2.80898	Cluster 5	---
1421818_at	Bcl6	11.2404	9.74138	10.7858	10.7377	-2.82651	Cluster 5	B-cell leukemia/lymphoma 6
1436819_at	2011-09-06	8.77819	7.27815	7.91051	7.79385	-2.82849	Cluster 5	septin 6
1424459_at	Lpcat1	11.1898	9.68386	10.5681	10.2498	-2.84015	Cluster 5	lysophosphatidylcholine acyltransferase 1
1427511_at		10.3805	8.87207	10.1275	9.36136	-2.84508	Cluster 5	---
1452348_s_at	100040462 /// Ifi203 /// Ifi204 /// Ifi205 /// LOC192690 /// LOC640890 /// Mnda	11.9157	10.4028	11.2797	11.5237	-2.85374	Cluster 5	interferon activated gene 204 /// interferon activated gene 205 /// myeloid cell nuclear differentiation antigen /// myeloid nuclear differentiation antigen like
1438031_at	Rasgrp3	9.83499	8.3183	9.24159	9.27142	-2.86135	Cluster 5	RAS, guanyl releasing protein 3
1429761_at	Rtn1	9.27	7.75195	8.52579	8.73614	-2.86404	Cluster 5	reticulon 1
1448986_x_at		9.68154	8.16336	8.70161	8.66656	-2.8643	Cluster 5	deoxyribonuclease II alpha
1458711_at		8.31685	6.79431	7.69081	7.66904	-2.87296	Cluster 5	---
1455656_at	Btla	13.0835	11.557	12.5168	12.2255	-2.88085	Cluster 5	B and T lymphocyte associated
1416505_at	Nr4a1	11.4448	9.91074	11.2028	10.7687	-2.89592	Cluster 5	nuclear receptor subfamily 4, group A, member 1
1417409_at	Jun	10.3799	8.8455	10.0463	9.65482	-2.8967	Cluster 5	Jun oncogene
1449856_at	Rgs18	9.85302	8.3172	9.23363	9.00419	-2.89954	Cluster 5	regulator of G-protein signaling 18
1424112_at	Igf2r	10.6857	9.14379	9.73461	9.55217	-2.9117	Cluster 5	insulin-like growth factor 2 receptor
1424181_at	2011-09-06	11.0378	9.47551	10.1464	10.0404	-2.95322	Cluster 5	septin 6
1449041_a_at	Trip6	8.76705	7.16491	8.06706	7.90132	-3.03595	Cluster 5	thyroid hormone receptor interactor 6
1457189_at		9.02295	7.41896	7.94401	7.88707	-3.03984	Cluster 5	---
1425470_at		8.86263	7.25656	8.46095	7.50956	-3.04421	Cluster 5	---
1444432_at	D330040H18Rik	7.39549	5.78673	6.40971	6.3421	-3.0499	Cluster 5	RIKEN cDNA D330040H18 gene
1452514_a_at	Kit	9.9468	8.33345	9.44928	9.3228	-3.0596	Cluster 5	kit oncogene
1426301_at	Alcam	11.5029	9.86718	10.7327	10.635	-3.10744	Cluster 5	activated leukocyte cell adhesion molecule
1455618_x_at	Tspan33	11.6401	9.98539	11.0682	11.0565	-3.14865	Cluster 5	tetraspanin 33
1416412_at	Nsmaf	10.8791	9.22083	10.1381	10.0831	-3.15633	Cluster 5	neutral sphingomyelinase (N-SMase) activation associated factor
1441242_at		9.07393	7.4109	8.46696	8.13138	-3.16682	Cluster 5	---
1434777_at	Mycl1	8.87038	7.20044	7.95108	8.10469	-3.182	Cluster 5	v-myc myelocytomatosis viral oncogene homolog 1, lung carcinoma derived (avian)
1459601_at	Sik1	8.54765	6.86761	7.87522	7.19745	-3.20438	Cluster 5	Salt inducible kinase 1
1449491_at	Card10	10.4986	8.8026	9.70474	9.56714	-3.23996	Cluster 5	caspase recruitment domain family, member 10
1455000_at	Gpr68	10.5036	8.80055	9.46779	9.91653	-3.25583	Cluster 5	G protein-coupled receptor 68
1438030_at	Rasgrp3	10.2592	8.55345	9.94947	9.48525	-3.26204	Cluster 5	RAS, guanyl releasing protein 3
1443086_at	Alcam	7.63558	5.92389	6.68885	6.38886	-3.27545	Cluster 5	activated leukocyte cell adhesion molecule
1440837_at	H2-Ob	12.2697	10.5433	11.7963	11.1692	-3.30889	Cluster 5	histocompatibility 2, O region beta locus
1445031_at		10.218	8.49157	9.70752	9.24011	-3.30902	Cluster 5	---
1460241_a_at	St3gal5	8.01115	6.27553	6.9667	6.84507	-3.33024	Cluster 5	ST3 beta-galactoside alpha-2,3-sialyltransferase 5
1444459_at		10.8151	9.06025	9.73707	9.90486	-3.37495	Cluster 5	---
1420398_at	Rgs18	10.4275	8.65908	9.47124	9.75117	-3.40678	Cluster 5	regulator of G-protein signaling 18
1418301_at	Irf6	7.66007	5.89116	6.636	6.29647	-3.40798	Cluster 5	interferon regulatory factor 6
1437467_at	Alcam	10.9423	9.13854	10.3363	9.94249	-3.49117	Cluster 5	activated leukocyte cell adhesion molecule
1446720_at		8.86077	7.04613	7.7666	7.54536	-3.51772	Cluster 5	---
1421855_at	Fgl2	12.8351	11.0128	12.094	11.4041	-3.53645	Cluster 5	fibrinogen-like protein 2
1434447_at	Met	10.0767	8.23852	9.17806	9.02095	-3.57547	Cluster 5	met proto-oncogene
1416441_at	Pgcp	9.75383	7.90204	8.96042	8.74706	-3.60947	Cluster 5	plasma glutamate carboxypeptidase
1428306_at	Ddit4	11.2902	9.43157	10.2542	10.1413	-3.62656	Cluster 5	DNA-damage-inducible transcript 4
1428736_at	Gramd3	10.8251	8.95466	10.2519	10.0667	-3.65655	Cluster 5	GRAM domain containing 3
1426208_x_at	Plagl1	7.58167	5.68712	6.73514	6.56804	-3.71804	Cluster 5	pleiomorphic adenoma gene-like 1
1417378_at	Cadm1	11.5314	9.63477	10.7478	9.9734	-3.72349	Cluster 5	cell adhesion molecule 1
1422134_at	Fosb	9.89967	7.99936	9.47011	8.83174	-3.73294	Cluster 5	FBJ osteosarcoma oncogene B
1444189_at		10.5644	8.59966	9.76601	9.0089	-3.90329	Cluster 5	---
1428301_at	100041195 /// 100041874 /// 544988 /// 666442 /// 666637 /// ENSMUSG00000063277 /// ENSMUSG00000068790 /// ENSMUSG00000072735 /// LOC100036568 /// LOC671957	7.57084	5.5585	6.64782	6.20385	-4.03435	Cluster 5	predicted gene, ENSMUSG00000068790 /// alpha-takusan pseudogene /// predicted gene 10406 /// predicted gene 2897 /// predicted gene 3373 /// predicted gene 3558 /// predicted gene 3696
1428332_at	Pik3ip1	9.4919	7.463	8.83434	8.5114	-4.08091	Cluster 5	phosphoinositide-3-kinase interacting protein 1
1421854_at	Fgl2	9.9872	7.89641	8.95884	8.41173	-4.25981	Cluster 5	fibrinogen-like protein 2
1417377_at	Cadm1	10.91	8.81568	9.98101	9.39652	-4.27033	Cluster 5	cell adhesion molecule 1
1433847_at	Fam40b	10.0471	7.94519	9.33491	9.00967	-4.29288	Cluster 5	family with sequence similarity 40, member B
1417376_a_at	Cadm1	10.3955	8.24093	9.46336	8.98505	-4.45221	Cluster 5	cell adhesion molecule 1
1436329_at	Egr3	9.20055	6.77452	8.80073	7.72534	-5.37412	Cluster 5	early growth response 3
1422065_at	Klrb1b	7.55027	5.07601	5.8811	5.94706	-5.55683	Cluster 5	killer cell lectin-like receptor subfamily B member 1B
1438454_at	B430203M17Rik	10.7712	9.77066	10.1268	9.92281	-2.0007	Cluster 6	phosphatase and tensin homolog
1436781_at	Man2b1	10.5685	9.5667	9.70767	9.51658	-2.00244	Cluster 6	mannosidase 2, alpha B1
1446475_at		9.11118	8.10918	8.19777	8.064	-2.00277	Cluster 6	---
1458188_at		8.47211	7.4675	7.86731	7.58172	-2.0064	Cluster 6	---
1435456_at	Ttc28	7.31842	6.31367	6.21633	5.97082	-2.0066	Cluster 6	tetratricopeptide repeat domain 28
1459196_at		5.83309	4.82753	5.25635	4.73215	-2.00772	Cluster 6	---
1440092_at		8.92828	7.92137	8.47847	7.68779	-2.0096	Cluster 6	---
1454617_at	Arrdc3	10.6925	9.68442	9.6932	8.87466	-2.0112	Cluster 6	arrestin domain containing 3
1453841_at	2310050P20Rik	7.06574	6.05293	6.6391	5.79412	-2.01784	Cluster 6	RIKEN cDNA 2310050P20 gene
1441534_at	C86753	7.30444	6.29034	6.37488	6.21817	-2.01964	Cluster 6	expressed sequence C86753
1436698_x_at	Tmem204	6.07947	5.06444	5.20583	4.95899	-2.02094	Cluster 6	transmembrane protein 204
1436499_at	Sgms1	11.7671	10.7508	11.1138	10.5349	-2.02278	Cluster 6	sphingomyelin synthase 1
1435875_at	Prkab2	9.3918	8.37466	8.47446	8.10845	-2.0239	Cluster 6	protein kinase, AMP-activated, beta 2 non-catalytic subunit
1454783_at	Il13ra1	9.90981	8.89078	8.75616	8.04959	-2.02656	Cluster 6	interleukin 13 receptor, alpha 1
1457548_at	Adamts6	5.81907	4.79891	5.31976	4.65551	-2.02813	Cluster 6	A disintegrin-like and metallopeptidase (reprolysin type) with thrombospondin type 1 motif, 6
1422619_at	Ppap2a	11.3521	10.3316	9.97322	9.80418	-2.02852	Cluster 6	phosphatidic acid phosphatase type 2A
1443624_at		8.76583	7.74539	8.17963	7.75851	-2.02854	Cluster 6	---
1423195_at	Hiat1	11.5004	10.4783	10.7836	10.6609	-2.03083	Cluster 6	hippocampus abundant gene transcript 1
1456435_at	Morn1	6.66806	5.64582	5.51488	5.43216	-2.03107	Cluster 6	MORN repeat containing 1
1441045_at	Ddx43	7.50477	6.47497	6.08451	6.24854	-2.04174	Cluster 6	DEAD (Asp-Glu-Ala-Asp) box polypeptide 43
1451775_s_at	Il13ra1	9.14037	8.10926	7.97368	7.95519	-2.0436	Cluster 6	interleukin 13 receptor, alpha 1
1460032_at		9.39485	8.36373	8.69423	8.31154	-2.04361	Cluster 6	---
1456891_at	Dennd2c	6.75531	5.72027	5.86716	5.83914	-2.04917	Cluster 6	DENN/MADD domain containing 2C
1416714_at	Irf8	13.7507	12.7142	13.0056	12.8283	-2.05123	Cluster 6	interferon regulatory factor 8
1426708_at	Antxr2	12.3251	11.2856	11.6226	10.9446	-2.05554	Cluster 6	anthrax toxin receptor 2
1441068_at	A130001G05Rik	9.71139	8.6703	8.86006	8.81433	-2.05777	Cluster 6	RIKEN cDNA A130001G05 gene
1456655_at		10.5025	9.46119	9.81856	9.6708	-2.05806	Cluster 6	hypothetical LOC100505027
1441799_at	6030422H21Rik	9.77476	8.73241	8.7486	8.17062	-2.05956	Cluster 6	RIKEN cDNA 6030422H21 gene
1426501_a_at	Tifa	9.56739	8.52474	8.80289	8.69525	-2.06001	Cluster 6	TRAF-interacting protein with forkhead-associated domain
1416129_at	Errfi1	10.3895	9.34261	9.66644	9.53636	-2.06601	Cluster 6	ERBB receptor feedback inhibitor 1
1448816_at	Ptgis	6.85416	5.80431	5.94968	5.65226	-2.07032	Cluster 6	prostaglandin I2 (prostacyclin) synthase
1443534_at		9.53324	8.47913	8.77411	8.02921	-2.07643	Cluster 6	---
1437361_at	OTTMUSG00000002043	11.6049	10.5483	10.6206	10.7606	-2.08015	Cluster 6	predicted gene 11545
1447541_s_at	Itgae	13.1976	12.1409	12.222	12.2747	-2.08024	Cluster 6	integrin alpha E, epithelial-associated
1426575_at	Sgms1	8.60873	7.55044	7.89366	7.68913	-2.08246	Cluster 6	sphingomyelin synthase 1
1419421_at	Ank1	8.46237	7.40251	7.41216	7.60488	-2.08473	Cluster 6	ankyrin 1, erythroid
1449947_s_at	Zfhx3	8.79746	7.73719	7.94095	7.72411	-2.08531	Cluster 6	zinc finger homeobox 3
1439808_at	Ipcef1	9.13352	8.07227	8.08152	7.95812	-2.08673	Cluster 6	interaction protein for cytohesin exchange factors 1
1433398_at	Fgd3	9.89327	8.83109	9.16692	9.03319	-2.08808	Cluster 6	FYVE, RhoGEF and PH domain containing 3
1446605_at		7.45385	6.38335	6.38617	6.57957	-2.10016	Cluster 6	---
1427072_at	Stard8	9.80609	8.73492	9.26251	8.523	-2.10113	Cluster 6	START domain containing 8
1430819_at	Naaa	8.05576	6.98436	6.66039	6.82839	-2.10147	Cluster 6	N-acylethanolamine acid amidase
1419833_s_at	Arap3	6.87874	5.8069	6.28455	5.86991	-2.10212	Cluster 6	ArfGAP with RhoGAP domain, ankyrin repeat and PH domain 3
1451702_at	Cmtm7	7.87021	6.79831	7.24527	7.00363	-2.1022	Cluster 6	CKLF-like MARVEL transmembrane domain containing 7
1435323_a_at	Mboat1	8.86529	7.78606	7.73366	7.88967	-2.11291	Cluster 6	membrane bound O-acyltransferase domain containing 1
1446739_at		6.62421	5.52923	5.70618	5.22981	-2.1361	Cluster 6	---
1460444_at	Arrb1	9.89004	8.79478	9.18571	8.89299	-2.13652	Cluster 6	arrestin, beta 1
1448452_at	Irf8	12.5495	11.4513	11.8068	11.6346	-2.14091	Cluster 6	interferon regulatory factor 8
1440315_at	Mbnl1	8.18237	7.08329	7.32666	7.04217	-2.14219	Cluster 6	muscleblind-like 1 (Drosophila)
1435321_at	Limch1	7.13682	6.03714	5.9371	5.81462	-2.14308	Cluster 6	LIM and calponin homology domains 1
1418944_at	Cysltr1	11.302	10.202	10.3439	10.6012	-2.14359	Cluster 6	cysteinyl leukotriene receptor 1
1438508_at		8.85975	7.7597	8.37208	7.71678	-2.14363	Cluster 6	---
1449215_at	Slc22a21	7.13812	6.038	6.28865	5.93236	-2.14373	Cluster 6	solute carrier family 22 (organic cation transporter), member 21
1422011_s_at	3830403N18Rik /// Xlr	9.19913	8.09804	7.43195	6.5587	-2.14517	Cluster 6	RIKEN cDNA 3830403N18 gene /// X-linked lymphocyte-regulated complex
1460591_at	Esr1	7.17896	6.07728	6.43844	6.31605	-2.14604	Cluster 6	estrogen receptor 1 (alpha)
1426120_a_at	Cd244 /// LOC677008	8.64627	7.54325	7.79008	7.62467	-2.14804	Cluster 6	CD244 natural killer cell receptor 2B4 /// natural killer cell receptor 2B4-like
1451634_at	2810051F02Rik	7.27657	6.17194	6.40637	6.22837	-2.15044	Cluster 6	antisense Igf2r RNA
1435874_at	Prkab2	10.197	9.09234	9.27032	8.94629	-2.15054	Cluster 6	protein kinase, AMP-activated, beta 2 non-catalytic subunit
1444171_at		8.5421	7.43679	8.02225	7.53096	-2.15145	Cluster 6	---
1459463_at		8.24175	7.13604	7.62957	7.3014	-2.15205	Cluster 6	---
1423679_at	2810432L12Rik	6.65902	5.5481	5.87157	5.51464	-2.15983	Cluster 6	RIKEN cDNA 2810432L12 gene
1440954_at		8.02316	6.91104	6.93027	6.66992	-2.16163	Cluster 6	---
1429205_at	Mllt3	8.06396	6.95116	7.1655	6.71387	-2.16265	Cluster 6	myeloid/lymphoid or mixed-lineage leukemia (trithorax homolog, Drosophila); translocated to, 3
1419322_at	Fgd6	7.73302	6.61998	6.92593	6.78553	-2.16301	Cluster 6	FYVE, RhoGEF and PH domain containing 6
1437506_at	Adamts6	6.82416	5.70981	5.85574	5.86369	-2.16497	Cluster 6	a disintegrin-like and metallopeptidase (reprolysin type) with thrombospondin type 1 motif, 6
1428256_at	Txndc15	12.7694	11.654	11.7083	11.8485	-2.16658	Cluster 6	thioredoxin domain containing 15
1455101_at	Phactr2	9.00835	7.88993	8.20642	8.22316	-2.17109	Cluster 6	phosphatase and actin regulator 2
1453384_at	Dennd1b	8.35861	7.2393	7.45315	7.08268	-2.17243	Cluster 6	DENN/MADD domain containing 1B
1443248_at	Tmco3	7.50462	6.38343	6.43616	6.05483	-2.17526	Cluster 6	transmembrane and coiled-coil domains 3
1441153_at		6.88431	5.76309	6.29009	5.59589	-2.1753	Cluster 6	---
1445866_at	Mast4	5.91021	4.78573	5.05602	4.96865	-2.18023	Cluster 6	microtubule associated serine/threonine kinase family member 4
1448416_at	Mgp	8.51747	7.39279	7.42436	6.82366	-2.18053	Cluster 6	matrix Gla protein
1416958_at	Nr1d2	9.46372	8.33558	8.78159	8.17265	-2.18576	Cluster 6	nuclear receptor subfamily 1, group D, member 2
1440790_x_at		8.65386	7.52406	7.74569	7.41505	-2.18828	Cluster 6	---
1427084_a_at	Map4k5	7.87834	6.74609	7.26588	6.90118	-2.19201	Cluster 6	mitogen-activated protein kinase kinase kinase kinase 5
1425263_a_at	Mbp	10.7819	9.64558	10.0476	9.89741	-2.19821	Cluster 6	myelin basic protein
1438643_at	Camk1d	10.3249	9.18601	9.27412	9.02636	-2.20208	Cluster 6	Calcium/calmodulin-dependent protein kinase ID
1429189_at	Arsb	12.3282	11.1842	11.0951	10.9684	-2.20997	Cluster 6	arylsulfatase B
1459894_at	Iqgap2	9.25925	8.11163	8.24127	8.29967	-2.21548	Cluster 6	IQ motif containing GTPase activating protein 2
1451708_at	Gpr33	9.00972	7.86205	8.29564	7.97485	-2.21556	Cluster 6	G protein-coupled receptor 33
1458296_at		7.8738	6.72409	6.95861	6.26951	-2.21869	Cluster 6	---
1437284_at	Fzd1	10.518	9.36591	9.07573	9.01779	-2.22239	Cluster 6	frizzled homolog 1 (Drosophila)
1416468_at	Aldh1a1	6.96678	5.81196	6.0902	5.5398	-2.22657	Cluster 6	aldehyde dehydrogenase family 1, subfamily A1
1431890_a_at	Mllt3	6.78755	5.63263	5.74283	5.66061	-2.22672	Cluster 6	myeloid/lymphoid or mixed-lineage leukemia (trithorax homolog, Drosophila); translocated to, 3
1429247_at	Anxa6	8.70735	7.54882	7.70187	7.61284	-2.23229	Cluster 6	annexin A6
1434800_at	Sv2b	7.41648	6.25697	6.30238	5.84808	-2.23381	Cluster 6	synaptic vesicle glycoprotein 2 b
1427033_at	Dnmbp	9.03757	7.87769	8.26795	8.10284	-2.23439	Cluster 6	dynamin binding protein
1437302_at	Adrb2	9.35801	8.19543	8.14463	7.91336	-2.23856	Cluster 6	adrenergic receptor, beta 2
1451887_at	Lrba	7.76778	6.60499	7.02408	6.48024	-2.23891	Cluster 6	LPS-responsive beige-like anchor
1449012_s_at	Fndc4	6.52079	5.35757	5.44316	5.45484	-2.23957	Cluster 6	fibronectin type III domain containing 4
1449519_at	Gadd45a	7.74725	6.57854	6.5087	6.25033	-2.24812	Cluster 6	growth arrest and DNA-damage-inducible 45 alpha
1441805_at	100040151	6.93122	5.75979	5.96366	5.78935	-2.25234	Cluster 6	predicted gene 2629
1460598_at	Il28ra	8.6273	7.45037	7.80809	7.56492	-2.26095	Cluster 6	interleukin 28 receptor alpha
1445665_at		7.30649	6.12467	6.4054	6.13125	-2.26862	Cluster 6	---
1442025_a_at		6.15124	4.96832	5.06762	4.64676	-2.27036	Cluster 6	---
1437466_at	Alcam	9.67069	8.48384	8.71997	8.20299	-2.27655	Cluster 6	activated leukocyte cell adhesion molecule
1460733_at	Unc119b	10.9507	9.75857	10.0302	10.1538	-2.28484	Cluster 6	unc-119 homolog B (C. elegans)
1440587_at		7.36779	6.17413	6.55039	6.09064	-2.28733	Cluster 6	---
1442122_at	AI451458	8.86785	7.67069	7.99698	7.73686	-2.29287	Cluster 6	expressed sequence AI451458
1452050_at	Camk1d	11.9005	10.7019	11.007	10.9117	-2.29508	Cluster 6	calcium/calmodulin-dependent protein kinase ID
1428156_at	Gng2	7.66451	6.46364	7.22969	6.15107	-2.29879	Cluster 6	guanine nucleotide binding protein (G protein), gamma 2
1427496_at	Cep152	9.58251	8.37992	8.46073	8.27968	-2.30152	Cluster 6	centrosomal protein 152
1456214_at	Pcdh7	5.75084	4.54654	4.64688	4.44144	-2.30426	Cluster 6	protocadherin 7
1446001_at		7.48511	6.27499	6.85236	6.27078	-2.31357	Cluster 6	---
1446969_at		7.0331	5.81914	6.18733	5.58614	-2.31973	Cluster 6	---
1446249_at		6.57805	5.36023	5.60102	5.2409	-2.32595	Cluster 6	---
1419125_at	Ptpn18	10.6704	9.4504	9.82799	9.68347	-2.32943	Cluster 6	protein tyrosine phosphatase, non-receptor type 18
1429494_at	Trim35	8.83711	7.61304	8.12659	7.72094	-2.33605	Cluster 6	tripartite motif-containing 35
1456500_at	Aph1b	9.83762	8.61352	8.7446	8.78737	-2.33609	Cluster 6	anterior pharynx defective 1b homolog (C. elegans)
1458126_at	D030041H20Rik	8.63977	7.41521	7.39295	7.10316	-2.33684	Cluster 6	RIKEN cDNA D030041H20 gene
1439678_at		10.0866	8.86154	9.21365	8.35592	-2.3376	Cluster 6	---
1429387_at	Grap	8.04606	6.81432	6.7025	6.65699	-2.3485	Cluster 6	GRB2-related adaptor protein
1434427_a_at	Rnf157	10.1395	8.90123	8.78282	8.6633	-2.35912	Cluster 6	ring finger protein 157
1456386_at		8.77367	7.53467	8.15939	7.60581	-2.36036	Cluster 6	---
1450070_s_at	Pak1	13.0097	11.7675	11.9311	11.8038	-2.36557	Cluster 6	p21 protein (Cdc42/Rac)-activated kinase 1
1440799_s_at	Farp2	6.64746	5.39919	5.428	5.15856	-2.37556	Cluster 6	FERM, RhoGEF and pleckstrin domain protein 2
1427306_at	Ryr1	11.0137	9.76071	10.0992	9.88997	-2.38336	Cluster 6	ryanodine receptor 1, skeletal muscle
1460047_at		9.01501	7.75874	8.2903	7.5933	-2.38878	Cluster 6	---
1445104_at	E230029C05Rik	9.45023	8.19202	8.16382	7.16568	-2.39199	Cluster 6	RIKEN cDNA E230029C05 gene
1418478_at	Lmo1	9.45427	8.19507	8.14232	8.19507	-2.39363	Cluster 6	LIM domain only 1
1429556_at	2610024B07Rik	7.11152	5.84939	5.81132	5.68349	-2.39849	Cluster 6	TEA domain family member 1
1424987_at	5430435G22Rik	12.4005	11.1381	11.2601	11.085	-2.39903	Cluster 6	RIKEN cDNA 5430435G22 gene
1447096_at		8.27492	7.01054	7.14138	6.58262	-2.40225	Cluster 6	---
1449198_a_at	St3gal5	11.2891	10.0244	10.3949	10.1282	-2.40275	Cluster 6	ST3 beta-galactoside alpha-2,3-sialyltransferase 5
1442760_x_at		9.18862	7.92335	8.57815	8.01236	-2.40372	Cluster 6	---
1431394_a_at	Lrrk2	10.3239	9.05755	9.30884	9.31237	-2.40546	Cluster 6	leucine-rich repeat kinase 2
1457671_at	9330120H11Rik	7.50009	6.22221	6.24282	6.01393	-2.42482	Cluster 6	homer homolog 2 (Drosophila)
1455793_at	Fam149a	9.29645	8.01708	7.95109	8.08317	-2.42733	Cluster 6	family with sequence similarity 149, member A
1459632_at		7.14393	5.8604	5.57647	5.15459	-2.43433	Cluster 6	---
1422159_at	Ppef2	8.5648	7.27862	6.85282	7.14136	-2.43882	Cluster 6	protein phosphatase, EF hand calcium-binding domain 2
1439686_at		9.28635	7.99908	8.50792	7.53896	-2.44066	Cluster 6	---
1417586_at	Timeless	11.3927	10.1022	10.092	9.84147	-2.44611	Cluster 6	timeless homolog (Drosophila)
1449249_at	Pcdh7	6.10689	4.81638	4.71927	4.52899	-2.44615	Cluster 6	protocadherin 7
1443602_at		6.85193	5.55836	5.77952	5.84984	-2.45134	Cluster 6	---
1416700_at	Rnd3	10.3979	9.10206	9.28563	8.98136	-2.45524	Cluster 6	Rho family GTPase 3
1416250_at	Btg2	11.9119	10.6153	10.8075	10.5128	-2.45646	Cluster 6	B-cell translocation gene 2, anti-proliferative
1449991_at	Cd244	11.1851	9.88689	10.1914	10.2938	-2.45916	Cluster 6	CD244 natural killer cell receptor 2B4
1456481_at	Fam62c	9.2024	7.89845	7.82068	7.86464	-2.46904	Cluster 6	extended synaptotagmin-like protein 3
1442409_at	D9Wsu90e	7.7313	6.42132	6.73013	6.30413	-2.47938	Cluster 6	DNA segment, Chr 9, Wayne State University 90, expressed
1417027_at	Trim2	6.49179	5.18153	5.40658	5.20483	-2.47986	Cluster 6	tripartite motif-containing 2
1423816_at	Cxx1b	10.6341	9.32189	9.19801	8.9372	-2.48313	Cluster 6	CAAX box 1 homolog A (human) /// CAAX box 1 homolog B (human)
1437854_at		9.20292	7.88892	8.30386	8.13257	-2.48629	Cluster 6	---
1418046_at	Nap1l2	6.76289	5.44664	5.69252	5.79044	-2.49019	Cluster 6	nucleosome assembly protein 1-like 2
1459665_s_at	Mrvi1	9.7225	8.40501	8.49806	8.31756	-2.49233	Cluster 6	MRV integration site 1
1426622_a_at	Qpct	11.8002	10.48	10.4887	10.5368	-2.49704	Cluster 6	glutaminyl-peptide cyclotransferase (glutaminyl cyclase)
1426399_at	Vwa1	7.49174	6.1702	5.86942	6.48062	-2.49932	Cluster 6	von Willebrand factor A domain containing 1
1420979_at	Pak1	11.4394	10.1026	10.3578	10.3367	-2.52598	Cluster 6	p21 protein (Cdc42/Rac)-activated kinase 1
1441972_at	6230424C14Rik	8.33751	6.99844	6.61849	6.11496	-2.52987	Cluster 6	RIKEN cDNA 6230424C14 gene
1453596_at	Id2	9.00891	7.66974	8.11378	7.68799	-2.53005	Cluster 6	inhibitor of DNA binding 2
1439998_at	Jmjd1c	9.58955	8.24993	8.81013	8.43286	-2.53086	Cluster 6	jumonji domain containing 1C
1454906_at	Rarb	6.73359	5.39328	5.58694	5.22595	-2.53205	Cluster 6	retinoic acid receptor, beta
1424050_s_at	Fgfr1	9.51777	8.17268	8.72143	8.20264	-2.54046	Cluster 6	fibroblast growth factor receptor 1
1431133_at	Arhgap18	9.05734	7.70944	7.38889	7.80308	-2.54542	Cluster 6	Rho GTPase activating protein 18
1421221_at	Bco2	9.4545	8.10076	8.10359	7.42307	-2.55574	Cluster 6	beta-carotene oxygenase 2
1443247_at		7.29473	5.93983	6.42907	5.70187	-2.5578	Cluster 6	---
1440037_at	Pbx1	10.2135	8.85836	8.82055	7.93925	-2.55822	Cluster 6	pre B-cell leukemia transcription factor 1
1440011_at		7.89957	6.5412	6.99882	6.69651	-2.56394	Cluster 6	---
1420407_at	Ltb4r1	11.1021	9.74285	9.70481	9.66185	-2.56546	Cluster 6	leukotriene B4 receptor 1
1437762_at	Rab39	7.73963	6.37716	6.762	6.79263	-2.57125	Cluster 6	RAB39, member RAS oncogene family
1455106_a_at	Ckb	12.6478	11.2808	11.4639	11.8667	-2.57926	Cluster 6	creatine kinase, brain
1441600_at	C920021A13	9.64831	8.2807	8.39469	7.64881	-2.58044	Cluster 6	hypothetical protein C920021A13
1445301_at	BC028528	9.58001	8.21159	8.71963	8.06913	-2.58188	Cluster 6	RIKEN cDNA C920021L13 gene
1435985_at		8.98468	7.61359	7.68599	7.55177	-2.58666	Cluster 6	FERM, RhoGEF and pleckstrin domain protein 2
1455452_x_at	Kctd14	12.1096	10.7353	11.0703	10.8113	-2.59236	Cluster 6	potassium channel tetramerisation domain containing 14
1429206_at	Rhobtb1	8.56751	7.19301	7.79659	7.16405	-2.59278	Cluster 6	Rho-related BTB domain containing 1
1435771_at	Plcb4	9.87517	8.50005	8.70622	8.80086	-2.5939	Cluster 6	phospholipase C, beta 4
1450344_a_at	Ptger3	6.4602	5.08297	5.44897	5.37388	-2.5977	Cluster 6	prostaglandin E receptor 3 (subtype EP3)
1422294_at	Xcr1	9.47926	8.09933	8.38914	8.26312	-2.60256	Cluster 6	chemokine (C motif) receptor 1
1426024_a_at	Dbn1	8.75487	7.37122	7.63747	7.8422	-2.60926	Cluster 6	drebrin 1
1426952_at	Arhgap18	10.4902	9.1014	9.29219	8.85573	-2.61865	Cluster 6	Rho GTPase activating protein 18
1426633_s_at	Kctd14	10.9073	9.51795	9.74616	9.82023	-2.61951	Cluster 6	potassium channel tetramerisation domain containing 14
1444962_at	EG665378	9.18285	7.79021	8.20134	8.05603	-2.62559	Cluster 6	predicted pseudogene 7609
1450897_at	Arhgap5	10.8798	9.4858	10.0276	9.63981	-2.62797	Cluster 6	Rho GTPase activating protein 5
1423194_at	Arhgap5	10.1191	8.72078	9.01373	9.11892	-2.63586	Cluster 6	Rho GTPase activating protein 5
1422776_at	Serpinb8	8.29169	6.89236	7.38137	7.1036	-2.63779	Cluster 6	serine (or cysteine) peptidase inhibitor, clade B, member 8
1426951_at	Crim1	9.20032	7.79923	7.78122	7.16411	-2.64102	Cluster 6	cysteine rich transmembrane BMP regulator 1 (chordin like)
1423224_at	Tctn2	7.62134	6.20858	5.96292	5.82441	-2.66245	Cluster 6	tectonic family member 2
1425282_at	Rnf144b	7.92654	6.51301	6.64462	6.8542	-2.66387	Cluster 6	ring finger protein 144B
1435687_at	Sv2b	7.58536	6.1665	6.1599	5.83909	-2.67374	Cluster 6	synaptic vesicle glycoprotein 2 b
1457776_at	D9Ertd720e	7.10901	5.685	5.54763	5.10957	-2.68331	Cluster 6	DNA segment, Chr 9, ERATO Doi 720, expressed
1444419_at	LOC100048394 /// Prcp	8.42434	7.00025	7.26994	7.30788	-2.68346	Cluster 6	prolylcarboxypeptidase (angiotensinase C)
1455451_at	Kctd14	11.4456	10.018	10.4081	10.2556	-2.69012	Cluster 6	potassium channel tetramerisation domain containing 14
1443739_at		7.67596	6.23448	6.38652	6.64635	-2.71599	Cluster 6	---
1455251_at	Itga1	8.66542	7.22191	6.85116	6.9182	-2.71981	Cluster 6	integrin alpha 1
1457549_at		8.48524	7.04117	7.3972	7.02207	-2.72087	Cluster 6	---
1418252_at	Padi2	8.9134	7.46927	7.95371	7.6961	-2.72099	Cluster 6	peptidyl arginine deiminase, type II
1445711_at	BB163080	7.42646	5.97844	6.81445	5.35106	-2.72832	Cluster 6	expressed sequence BB163080
1427996_at	BC028528	12.4227	10.9709	11.3556	11.2661	-2.73557	Cluster 6	cDNA sequence BC028528
1449216_at	Itgae	12.3494	10.8918	11.0191	11.1743	-2.7465	Cluster 6	integrin alpha E, epithelial-associated
1435830_a_at	5430435G22Rik	9.80911	8.34239	8.87086	8.55716	-2.76391	Cluster 6	RIKEN cDNA 5430435G22 gene
1420980_at	Pak1	11.6241	10.1542	10.3964	10.2488	-2.77016	Cluster 6	p21 protein (Cdc42/Rac)-activated kinase 1
1441692_at		8.63058	7.15904	7.35205	6.70327	-2.77319	Cluster 6	---
1441072_at		7.25816	5.76503	6.05175	5.51902	-2.815	Cluster 6	---
1434572_at	Hdac9	8.92156	7.42481	7.95558	7.3103	-2.82206	Cluster 6	histone deacetylase 9
1457410_at	Arhgap5	8.10248	6.6039	7.05673	6.26511	-2.82564	Cluster 6	Rho GTPase activating protein 5
1445984_at		9.24278	7.74259	7.7939	7.30256	-2.82879	Cluster 6	---
1439650_at	Rtn4	10.3335	8.82953	9.619	8.86734	-2.83624	Cluster 6	reticulon 4
1423153_x_at	Cfh /// LOC100048018	8.44456	6.93966	7.36529	6.72493	-2.83804	Cluster 6	complement component factor h
1429543_at	6230424C14Rik	8.21601	6.70316	6.9368	6.67908	-2.85374	Cluster 6	RIKEN cDNA 6230424C14 gene
1424367_a_at	Homer2	8.33516	6.82149	6.76754	6.3683	-2.85536	Cluster 6	homer homolog 2 (Drosophila)
1454966_at	Itga8	8.52622	7.00834	7.28065	6.78598	-2.8637	Cluster 6	integrin alpha 8
1444367_at	Fndc7	8.07617	6.55695	6.82226	6.63167	-2.86637	Cluster 6	fibronectin type III domain containing 7
1450876_at	Cfh /// LOC100048018	8.81058	7.2811	7.63431	7.1369	-2.88682	Cluster 6	complement component factor h
1437136_at	5830436I19Rik	8.14478	6.61045	7.19517	6.48524	-2.89655	Cluster 6	RIKEN cDNA 5830436I19 gene
1437584_at		11.1951	9.64206	10.2104	9.07626	-2.9343	Cluster 6	---
1459860_x_at	Trim2	8.03414	6.47397	7.00987	5.86477	-2.94888	Cluster 6	tripartite motif-containing 2
1431226_a_at	Fndc4	8.2358	6.66826	6.7703	6.32793	-2.96399	Cluster 6	fibronectin type III domain containing 4
1447040_at		8.01502	6.44732	6.80402	6.44879	-2.96431	Cluster 6	---
1425543_s_at	Plekha5	9.9099	8.31752	8.54777	8.46654	-3.01546	Cluster 6	pleckstrin homology domain containing, family A member 5
1460255_at	Tnfsf13b	10.882	9.27722	9.27848	8.51018	-3.04155	Cluster 6	tumor necrosis factor (ligand) superfamily, member 13b
1435284_at	Rtn4	10.61	8.9996	9.77723	8.96661	-3.05336	Cluster 6	reticulon 4
1425802_a_at	Fcrla	9.07027	7.45322	7.76737	7.40654	-3.06747	Cluster 6	Fc receptor-like A
1420463_at	Clnk	9.50266	7.87928	8.0498	8.07646	-3.08095	Cluster 6	cytokine-dependent hematopoietic cell linker
1449309_at	Cyp8b1	9.88097	8.25409	7.43833	7.08202	-3.08845	Cluster 6	cytochrome P450, family 8, subfamily b, polypeptide 1
1429190_at	Arsb	8.57885	6.95189	7.13437	7.1701	-3.08861	Cluster 6	arylsulfatase B
1428283_at	Cyp2s1	10.1768	8.54793	8.71116	8.69462	-3.09279	Cluster 6	cytochrome P450, family 2, subfamily s, polypeptide 1
1424111_at	Igf2r	8.33249	6.70259	7.28333	6.81597	-3.09491	Cluster 6	insulin-like growth factor 2 receptor
1425243_at	Cd207	11.0184	9.374	8.7194	8.04617	-3.12626	Cluster 6	CD207 antigen
1437442_at	Pcdh7	6.59973	4.94643	5.1369	5.00486	-3.14554	Cluster 6	Protocadherin 7
1425436_x_at	Klra3 /// Klra9	9.40514	7.74294	8.1962	8.08473	-3.16499	Cluster 6	killer cell lectin-like receptor, subfamily A, member 3 /// killer cell lectin-like receptor subfamily A, member 9
1454656_at	Spata13	9.9112	8.24888	8.61473	8.10811	-3.16524	Cluster 6	spermatogenesis associated 13
1427345_a_at	Sult1a1	11.7883	10.1247	9.8079	9.35013	-3.1682	Cluster 6	sulfotransferase family 1A, phenol-preferring, member 1
1420421_s_at	Klrb1b	12.0418	10.3647	10.5321	10.3059	-3.19794	Cluster 6	killer cell lectin-like receptor subfamily B member 1B
1435792_at	Csprs /// EG665317	9.83388	8.15602	8.751	8.17775	-3.19952	Cluster 6	component of Sp100-rs /// predicted gene 7592
1418497_at	Fgf13	7.51574	5.83191	6.21603	6.2527	-3.21278	Cluster 6	fibroblast growth factor 13
1438882_at		10.4389	8.73641	8.93532	7.90473	-3.25454	Cluster 6	---
1429001_at	Pir	8.61711	6.91268	6.17181	6.11862	-3.25898	Cluster 6	pirin
1437865_at	Spata13	8.03688	6.32862	7.03208	6.29998	-3.26765	Cluster 6	spermatogenesis associated 13
1450896_at	Arhgap5	8.18023	6.4667	6.61747	6.49489	-3.27962	Cluster 6	Rho GTPase activating protein 5
1446567_at		7.52159	5.80105	6.52374	5.93221	-3.29559	Cluster 6	---
1435939_s_at	Hepacam2	11.8178	10.0933	10.3198	9.25026	-3.30467	Cluster 6	HEPACAM family member 2
1422542_at	Gpr34	7.8359	6.11102	6.60869	6.48718	-3.30552	Cluster 6	G protein-coupled receptor 34
1448669_at	Dkk3	8.25121	6.52071	6.68525	5.95715	-3.31843	Cluster 6	dickkopf homolog 3 (Xenopus laevis)
1416168_at	Serpinf1	8.73529	6.97995	7.31095	7.07558	-3.37605	Cluster 6	serine (or cysteine) peptidase inhibitor, clade F, member 1
1420877_at	2011-09-06	8.13314	6.36755	6.8734	6.79143	-3.40013	Cluster 6	septin 6
1444392_at		8.04323	6.26123	6.53093	6.4885	-3.43903	Cluster 6	---
1422782_s_at	Tlr3	12.0785	10.292	10.6004	9.73842	-3.4499	Cluster 6	toll-like receptor 3
1430622_at	4833423F13Rik	9.15468	7.34127	7.94057	7.45863	-3.51473	Cluster 6	hypothetical LOC100504504
1445152_at		8.26449	6.44931	7.16465	6.36834	-3.51903	Cluster 6	---
1445399_at	Klrb1b	12.0762	10.2463	10.5291	10.0625	-3.55498	Cluster 6	killer cell lectin-like receptor subfamily B member 1B
1458781_at		8.18917	6.35504	6.82207	6.35046	-3.56555	Cluster 6	---
1420789_at	Klra5	6.99398	5.158	5.60534	5.33487	-3.57014	Cluster 6	killer cell lectin-like receptor, subfamily A, member 5
1452398_at	Plce1	9.46999	7.61012	7.68913	6.98314	-3.62974	Cluster 6	phospholipase C, epsilon 1
1449146_at	Notch4	10.0155	8.13441	8.08804	7.59525	-3.68351	Cluster 6	Notch gene homolog 4 (Drosophila)
1417312_at	Dkk3	8.86284	6.95834	7.12651	6.93569	-3.74379	Cluster 6	dickkopf homolog 3 (Xenopus laevis)
1422671_s_at	Naalad2	11.6879	9.77677	9.73308	8.51966	-3.76097	Cluster 6	N-acetylated alpha-linked acidic dipeptidase 2
1422066_x_at	Klrb1b	8.95984	6.99695	7.37689	7.02523	-3.89841	Cluster 6	killer cell lectin-like receptor subfamily B member 1B
1419907_s_at	Fcrla	9.65864	7.68152	8.40708	7.62684	-3.93706	Cluster 6	Fc receptor-like A
1420544_at	Gcet2	10.7898	8.78299	9.20775	8.95056	-4.01904	Cluster 6	germinal center expressed transcript 2
1437950_at	Fam149a	7.26831	5.25766	5.05994	5.03962	-4.02965	Cluster 6	family with sequence similarity 149, member A
1423854_a_at	Rasl11b	10.4356	8.41487	8.07402	7.47953	-4.05781	Cluster 6	RAS-like, family 11, member B
1435710_at	AI661384	10.1043	8.05832	8.63892	7.73381	-4.12953	Cluster 6	expressed sequence AI661384
1442582_at	Gcet2	10.0176	7.93715	8.13224	7.78992	-4.22934	Cluster 6	germinal center expressed transcript 2
1418723_at	Lpar3	10.0863	7.95023	8.71197	8.05242	-4.3955	Cluster 6	lysophosphatidic acid receptor 3
1422067_at	Klrb1b	10.7212	8.55838	9.07103	8.87347	-4.47778	Cluster 6	killer cell lectin-like receptor subfamily B member 1B
1436178_at	Leprel1	10.2619	8.09557	8.90359	8.13576	-4.48869	Cluster 6	leprecan-like 1
1449925_at	Cxcr3	11.5195	9.33781	9.7953	9.23582	-4.53696	Cluster 6	chemokine (C-X-C motif) receptor 3
1422781_at	Tlr3	10.3992	8.18347	8.74541	7.83693	-4.64525	Cluster 6	toll-like receptor 3
1452352_at	Ctla2b	8.58396	6.34143	7.30122	6.72927	-4.73226	Cluster 6	cytotoxic T lymphocyte-associated protein 2 beta

## Sheet: Suppl. Table 2
Annotation		Normalized log2 signal intensities				Fold change	Cluster information	Gene description
Probe Set ID	Gene Symbol	Contr CD8- lung DC	Asthma CD8- lung DC	Contr CD8+ lung DC	Asthma CD8+ lung DC	Asthma CD8+ lung DC vs. Contr CD8+ lung DC Total: 171 (up: 19, down: 152)	K-means cluster #	Description
1418509_at	Pou2af1	4.59433	4.95712	8.91498	5.1638	-13.4654	Cluster 1	POU domain, class 2, associating factor 1
1419144_at	Ms4a1	4.51143	4.88795	9.20701	5.51576	-12.9175	Cluster 1	membrane-spanning 4-domains, subfamily A, member 1
1419282_at	Cd163	6.79075	6.80029	9.04105	5.80254	-9.43817	Cluster 1	CD163 antigen
1419684_at	Bank1	5.74219	5.75619	9.31436	6.47002	-7.18178	Cluster 1	B-cell scaffold protein with ankyrin repeats 1
1424374_at	Gimap4	5.2633	5.20516	8.50077	5.76859	-6.64457	Cluster 1	GTPase, IMAP family member 4
1427455_x_at	Lyve1	5.01004	5.42983	8.13706	5.51209	-6.16873	Cluster 1	lymphatic vessel endothelial hyaluronan receptor 1
1428947_at	Faim3	5.6491	6.32871	9.33831	6.82934	-5.69214	Cluster 1	Fas apoptotic inhibitory molecule 3
1437405_a_at	Ms4a1	5.3186	5.74469	10.1329	7.64644	-5.60392	Cluster 1	membrane-spanning 4-domains, subfamily A, member 1
1437636_at	2010309G21Rik /// Igl-C2	5.67582	6.9417	10.0447	7.58055	-5.51818	Cluster 1	RIKEN cDNA 2010309G21 gene /// immunoglobulin lambda chain, constant region 2
1439771_s_at	Klk1	4.88561	4.93515	7.16237	4.75977	-5.28758	Cluster 1	kallikrein 1
1447849_s_at	Gbp1	6.60453	6.52316	8.93011	6.53743	-5.25133	Cluster 1	guanylate binding protein 1
1450570_a_at	F13a1	6.49232	8.83562	9.92074	7.57643	-5.07815	Cluster 1	coagulation factor XIII, A1 subunit
1452417_x_at	2010309G21Rik /// Igl-C2 /// Igl-C3	5.63446	8.10025	10.8659	8.528	-5.05552	Cluster 1	RIKEN cDNA 2010309G21 gene /// immunoglobulin lambda chain, constant region 2 /// immunoglobulin lambda chain, constant region 3
1454708_at	EG637227 /// ENSMUSG00000076577 /// Gm1420 /// Igk /// Igk-C /// Igk-V28 /// LOC100047628	4.93379	10.3266	12.1165	9.8036	-4.9687	Cluster 1	predicted gene 10883 /// predicted gene 1420 /// predicted gene 7202 /// immunoglobulin kappa chain, constant region /// immunoglobulin kappa chain, joining region, 1 /// immunoglobulin kappa chain variable 28 (V28)
1459914_at	Ikzf3	4.77623	4.65924	7.13425	4.84439	-4.8901	Cluster 1	IKAROS family zinc finger 3
1460555_at	Ccl8	5.69664	6.95068	9.87931	7.65327	-4.67849	Cluster 1	chemokine (C-C motif) ligand 8
1415837_at	EG637227 /// ENSMUSG00000076577 /// Gm1420 /// Igk /// Igk-C /// Igk-V28 /// LOC100047628	5.67149	10.14	11.9904	9.78629	-4.60778	Cluster 1	predicted gene 10883 /// predicted gene 1420 /// predicted gene 7202 /// immunoglobulin kappa chain, constant region /// immunoglobulin kappa chain, joining region, 1 /// immunoglobulin kappa chain variable 28 (V28)
1415964_at	Srpk3	5.23772	5.31456	7.84631	5.88702	-3.88872	Cluster 1	serine/arginine-rich protein specific kinase 3
1416301_a_at	Klk1	4.44633	4.69657	6.67026	4.71611	-3.87489	Cluster 1	kallikrein 1
1416808_at	2010205A11Rik /// EG637227 /// ENSMUSG00000076577 /// Gm1420 /// Igk /// Igk-C /// Igk-V28 /// LOC100047628	4.45242	9.72573	11.423	9.4792	-3.84729	Cluster 1	predicted gene 10883 /// predicted gene 1420 /// predicted gene 7202 /// immunoglobulin kappa chain, constant region /// immunoglobulin kappa chain, joining region, 1 /// immunoglobulin kappa chain variable 28 (V28)
1416930_at	Cbr2	7.04134	6.95182	8.78624	6.91143	-3.66756	Cluster 1	carbonyl reductase 2
1416957_at	Ets1	5.76621	4.91745	8.08711	6.26755	-3.52972	Cluster 1	E26 avian leukemia oncogene 1, 5' domain
1417185_at	Igl /// Igl-V1 /// LOC433053	5.33982	5.27245	7.72938	5.9218	-3.50053	Cluster 1	immunoglobulin lambda chain, constant region 1 /// immunoglobulin lambda chain, variable 1 /// similar to Ig lambda-1 chain C region
1417494_a_at	Igfbp4	6.59585	5.98216	8.17956	6.39319	-3.44947	Cluster 1	insulin-like growth factor binding protein 4
1417640_at	2010001M09Rik	6.68665	7.55671	9.20335	7.45394	-3.3622	Cluster 1	RIKEN cDNA 2010001M09 gene
1418021_at	Cd19	5.83472	5.81777	7.928	6.18918	-3.33762	Cluster 1	CD19 antigen
1419043_a_at	Gimap8	5.46785	5.48554	7.81506	6.11019	-3.26001	Cluster 1	GTPase, IMAP family member 8
1419603_at	ENSMUSG00000076577	5.80811	7.85151	9.15154	7.45745	-3.23573	Cluster 1	predicted gene 10883
1420549_at	Gimap4	6.21281	6.46434	7.97334	6.27992	-3.23423	Cluster 1	GTPase, IMAP family member 4
1421571_a_at	Maf	7.9826	7.1927	9.67599	7.99556	-3.20524	Cluster 1	avian musculoaponeurotic fibrosarcoma (v-maf) AS42 oncogene homolog
1423226_at	Ccl12	4.98301	5.31329	7.60495	5.94491	-3.16027	Cluster 1	chemokine (C-C motif) ligand 12
1423756_s_at	Igl /// Igl	5.45239	5.4965	7.51077	5.89828	-3.05778	Cluster 1	Immunoglobulin lambda chain, variable 1
1424375_s_at	Ablim1	7.00021	6.73382	8.76784	7.16801	-3.03108	Cluster 1	actin-binding LIM protein 1
1424931_s_at	Igfbp4	8.56986	7.60834	9.67949	8.11149	-2.96493	Cluster 1	insulin-like growth factor binding protein 4
1427660_x_at	Retnla	11.9591	12.732	13.52	12.0083	-2.85148	Cluster 1	resistin like alpha
1427891_at	Atp1b1	4.2782	4.23724	6.18728	4.69058	-2.82197	Cluster 1	ATPase, Na+/K+ transporting, beta 1 polypeptide
1428100_at	Maf	6.39782	5.85817	8.35779	6.92069	-2.70777	Cluster 1	avian musculoaponeurotic fibrosarcoma (v-maf) AS42 oncogene homolog
1428719_at	C4b	7.5067	7.48111	8.71225	7.27929	-2.70001	Cluster 1	complement component 4B (Childo blood group)
1428720_s_at	Cd38	7.5143	6.56773	9.1792	7.75677	-2.68035	Cluster 1	CD38 antigen
1429379_at	Cp	4.79912	5.33016	6.51201	5.12524	-2.61491	Cluster 1	ceruloplasmin
1429889_at	Cd79b	5.60373	6.58856	9.33775	7.98392	-2.5559	Cluster 1	CD79B antigen
1433741_at	Mpa2l	5.76741	6.57612	7.5125	6.16841	-2.53871	Cluster 1	guanylate-binding protein 10 /// macrophage activation 2 like
1436448_a_at	Mcart6	6.00863	6.03985	7.41824	6.07451	-2.53807	Cluster 1	mitochondrial carrier triple repeat 6
1436649_at	Ly6a	9.60495	9.62701	12.123	10.7946	-2.51128	Cluster 1	lymphocyte antigen 6 complex, locus A
1437347_at	Nid1	5.35061	5.05293	6.54648	5.22595	-2.49759	Cluster 1	nidogen 1
1437939_s_at	Ptgs1	6.48437	7.76789	8.86157	7.54996	-2.48217	Cluster 1	prostaglandin-endoperoxide synthase 1
1439036_a_at		8.68242	7.80472	9.47728	8.17537	-2.46555	Cluster 1	---
1441317_x_at	Jakmip1	5.89345	5.63182	8.036	6.73528	-2.46353	Cluster 1	janus kinase and microtubule interacting protein 1
1441977_at	Ctsc	5.79977	6.15308	7.09683	5.8098	-2.44025	Cluster 1	cathepsin C
1447806_s_at	Ighv14-2	6.43595	5.80319	7.81913	6.53359	-2.43772	Cluster 1	immunoglobulin heavy variable V14-2
1447918_x_at	Scd1	7.82934	8.45014	9.68597	8.41796	-2.4083	Cluster 1	stearoyl-Coenzyme A desaturase 1
1447927_at	Fcrls	9.63983	10.6437	10.9606	9.70974	-2.37982	Cluster 1	Fc receptor-like S, scavenger receptor
1448107_x_at	Gimap6	5.12938	5.03623	6.70828	5.47595	-2.34945	Cluster 1	GTPase, IMAP family member 6
1448891_at	Ly6d	6.83102	6.89092	8.26735	7.0729	-2.28857	Cluster 1	lymphocyte antigen 6 complex, locus D
1448929_at	D13Ertd608e	4.7463	5.5522	9.12337	7.97085	-2.22302	Cluster 1	DNA segment, Chr 13, ERATO Doi 608, expressed
1449015_at	Ednrb	4.62071	5.14399	6.44803	5.30294	-2.21159	Cluster 1	endothelin receptor type B
1450912_at	LOC100045833 /// Ly6c1 /// Ly6c2	7.68365	9.1463	10.2157	9.07228	-2.20903	Cluster 1	lymphocyte antigen 6 complex, locus C1 /// lymphocyte antigen 6 complex, locus C2
1452163_at	Fam65b	7.44513	7.0973	8.80737	7.68091	-2.18321	Cluster 1	family with sequence similarity 65, member B
1452463_x_at	Cp	5.61993	5.57421	6.4308	5.33249	-2.14105	Cluster 1	ceruloplasmin
1455393_at	Ifi204	5.30504	5.89332	6.8591	5.76311	-2.13759	Cluster 1	interferon activated gene 204
1455530_at	Iigp1	5.15143	5.22595	7.73844	6.64484	-2.13407	Cluster 1	interferon inducible GTPase 1
1456060_at	Ear11	6.38132	11.4976	13.3434	12.2552	-2.12612	Cluster 1	eosinophil-associated, ribonuclease A family, member 11
1456061_at	Ebf1	4.23066	4.14239	5.49127	4.40532	-2.12278	Cluster 1	early B-cell factor 1
1456328_at	Sfrs1	8.02021	7.74534	8.95582	7.88651	-2.09844	Cluster 1	serine/arginine-rich splicing factor 1
1425295_at	LOC623121	5.13093	5.20632	6.31053	5.26165	-2.06892	Cluster 1	RIKEN cDNA E030037K03 gene
1438027_at	9630023C09Rik	5.341	5.39506	6.32601	5.31483	-2.01556	Cluster 1	RIKEN cDNA 9630023C09 gene
1421628_at	Prpf39	8.41047	7.41746	8.84619	6.93818	-3.7529	Cluster 2	PRP39 pre-mRNA processing factor 39 homolog (yeast)
1422671_s_at	H3f3b	9.17437	8.94328	9.77963	8.18923	-3.01132	Cluster 2	H3 histone, family 3B
1428907_at	LOC100270747	6.9192	6.0804	6.9361	5.42959	-2.84122	Cluster 2	expressed sequence AI503316
1430109_at	Emr4	6.31201	5.76109	6.8579	5.3556	-2.83293	Cluster 2	EGF-like module containing, mucin-like, hormone receptor-like sequence 4
1430357_at	BB163080	7.42646	5.97844	6.81445	5.35106	-2.75756	Cluster 2	expressed sequence BB163080
1436329_at	Klhl24	8.89504	8.61458	8.79366	7.43207	-2.56968	Cluster 2	kelch-like 24 (Drosophila)
1437913_at	Mycbp2	7.28415	7.08082	7.45084	6.09467	-2.56004	Cluster 2	MYC binding protein 2
1439687_at	A430102J17Rik	8.69065	7.59616	8.67291	7.39697	-2.42156	Cluster 2	RIKEN cDNA A430102J17 gene
1440551_at	2600010E01Rik	8.04978	7.92182	7.62848	6.36297	-2.40413	Cluster 2	proline rich 5 like
1442014_at		9.35042	9.32781	9.60915	8.35066	-2.39246	Cluster 2	---
1442811_at	0610037M15Rik /// H2-gs10	7.19592	5.60362	7.71899	6.47552	-2.36768	Cluster 2	MHC class I like protein GS10 /// histocompatibility 2, Q region locus 6 /// histocompatibility 2, Q region locus 6-like
1443088_at	Naalad2	11.6879	9.77677	9.73308	8.51966	-2.31887	Cluster 2	N-acetylated alpha-linked acidic dipeptidase 2
1457376_at	Hpgd	9.8518	9.0709	9.78322	8.58906	-2.28811	Cluster 2	hydroxyprostaglandin dehydrogenase 15 (NAD)
1419905_s_at	Sftpc	8.60055	8.33015	8.48115	7.32404	-2.2301	Cluster 2	surfactant associated protein C
1420098_s_at	Trim2	8.03414	6.47397	7.00987	5.86477	-2.21162	Cluster 2	tripartite motif-containing 2
1424998_at	Ptprc	9.6722	8.70427	9.59126	8.44963	-2.20629	Cluster 2	Protein tyrosine phosphatase, receptor type, C
1428156_at	Il18r1	8.67802	7.53826	8.51175	7.37427	-2.19997	Cluster 2	interleukin 18 receptor 1
1428172_at	Emr4	9.40071	8.55481	10.0566	8.92136	-2.19655	Cluster 2	EGF-like module containing, mucin-like, hormone receptor-like sequence 4
1428224_at		11.1951	9.64206	10.2104	9.07626	-2.19484	Cluster 2	---
1429351_at	Clcn4-2	10.0423	9.99067	10.2599	9.14347	-2.16817	Cluster 2	chloride channel 4-2
1431577_at		9.76458	8.47961	9.64801	8.53789	-2.15864	Cluster 2	---
1434390_at	Rgmb	7.09481	6.44087	7.10316	6.00476	-2.14118	Cluster 2	RGM domain family, member B
1435939_s_at	5430437J10Rik	8.79047	8.23378	9.189	8.0985	-2.12948	Cluster 2	RIKEN cDNA 5430437J10 gene
1436766_at	Cep192	6.52067	6.09055	6.74065	5.66075	-2.11389	Cluster 2	Centrosomal protein 192
1437584_at	Gng2	7.66451	6.46364	7.22969	6.15107	-2.11201	Cluster 2	guanine nucleotide binding protein (G protein), gamma 2
1438259_at		6.5484	5.68758	6.61604	5.53859	-2.1103	Cluster 2	---
1438398_at	Egr3	9.20055	6.77452	8.80073	7.72534	-2.10729	Cluster 2	early growth response 3
1438882_at	Hepacam2	11.8178	10.0933	10.3198	9.25026	-2.09872	Cluster 2	HEPACAM family member 2
1438895_at	Luc7l2	10.5762	10.2654	10.8667	9.79809	-2.09741	Cluster 2	hypothetical LOC100504012 /// LUC7-like 2 (S. cerevisiae)
1439819_at	9930031P18Rik	7.90558	7.85867	8.11682	7.05177	-2.09224	Cluster 2	RIKEN cDNA 9930031P18 gene
1440026_at	Hnrpdl	8.25753	7.87428	8.54147	7.48454	-2.0805	Cluster 2	heterogeneous nuclear ribonucleoprotein D-like
1440081_at	Rbm25	8.26993	7.81578	8.61537	7.55999	-2.07827	Cluster 2	RNA binding motif protein 25
1440165_at	4833412E19Rik	7.7181	6.25132	7.66955	6.63392	-2.05	Cluster 2	RIKEN cDNA 4833412E19 gene
1440671_at	D13Ertd787e	8.20956	7.28654	8.25987	7.22615	-2.04729	Cluster 2	DNA segment, Chr 13, ERATO Doi 787, expressed
1445340_at	Bcl2a1a /// Bcl2a1b /// Bcl2a1d	7.86189	7.07344	7.99078	6.9571	-2.04724	Cluster 2	B-cell leukemia/lymphoma 2 related protein A1a /// B-cell leukemia/lymphoma 2 related protein A1b /// B-cell leukemia/lymphoma 2 related protein A1d
1445711_at		6.59289	6.02283	6.27037	5.23843	-2.04477	Cluster 2	---
1451563_at		10.4389	8.73641	8.93532	7.90473	-2.04286	Cluster 2	---
1451644_a_at		7.63339	7.28486	7.88274	6.85818	-2.03433	Cluster 2	---
1459860_x_at	A130012E19Rik	7.61752	6.8055	7.85675	6.83422	-2.03147	Cluster 2	RIKEN cDNA A130012E19 gene
1415986_at	Rab14	8.35664	8.29342	8.60378	7.58459	-2.02678	Cluster 2	RAB14, member RAS oncogene family
1418639_at		8.40541	7.28432	8.47823	7.47016	-2.01122	Cluster 2	---
1429909_at	AU015263	9.68528	9.73228	9.9186	8.91275	-2.00812	Cluster 2	expressed sequence AU015263
1416271_at	Ang	7.24362	9.79849	8.8019	7.24109	-2.95018	Cluster 3	angiogenin, ribonuclease, RNase A family, 5
1419123_a_at	Fpr2	10.9602	12.8849	10.0648	8.56643	-2.82521	Cluster 3	formyl peptide receptor 2
1421182_at	Slc39a2	7.39017	9.9031	6.89299	5.45519	-2.70908	Cluster 3	solute carrier family 39 (zinc transporter), member 2
1422010_at	Acaa1b	10.6173	13.1587	10.0163	8.65975	-2.56081	Cluster 3	acetyl-Coenzyme A acyltransferase 1B
1422953_at	Fabp1	10.363	13.3117	10.5148	9.18475	-2.51416	Cluster 3	fatty acid binding protein 1, liver
1434191_at	Aadacl1	9.80028	11.8626	9.81788	8.50879	-2.47785	Cluster 3	arylacetamide deacetylase-like 1
1434451_at	Sspn	4.74135	5.90713	5.72302	4.46767	-2.38723	Cluster 3	sarcospan
1435748_at	Car4	7.98376	10.9751	7.96781	6.71768	-2.37862	Cluster 3	carbonic anhydrase 4
1436779_at	Tspan32	5.956	8.26845	7.52581	6.31984	-2.30692	Cluster 3	tetraspanin 32
1438937_x_at	Cd22	9.56002	11.5742	10.6545	9.45964	-2.28927	Cluster 3	CD22 antigen
1444040_at	Plcb1	7.75202	9.17921	7.93664	6.74338	-2.28669	Cluster 3	phospholipase C, beta 1
1448764_a_at	Ear1	10.2286	12.5043	9.62163	8.43605	-2.27455	Cluster 3	eosinophil-associated, ribonuclease A family, member 1
1448949_at	Gda	10.2906	11.3245	11.268	10.0841	-2.27187	Cluster 3	guanine deaminase
1456893_at	ENSMUSG00000074917	7.96439	10.1302	8.04036	6.87194	-2.24766	Cluster 3	predicted gene 10786
1417644_at	Tmem195	8.03581	9.18968	6.55841	5.39909	-2.23352	Cluster 3	transmembrane protein 195
1419768_at	Gda	10.8226	11.9714	11.5548	10.399	-2.22811	Cluster 3	guanine deaminase
1421802_at	Cidec	8.0385	10.8668	7.30997	6.17418	-2.19739	Cluster 3	cell death-inducing DFFA-like effector c
1421923_at	Htr2c	5.92857	8.76008	5.87275	4.74252	-2.18894	Cluster 3	5-hydroxytryptamine (serotonin) receptor 2C
1422603_at	Lair1	7.49534	8.67633	8.44517	7.32041	-2.18066	Cluster 3	leukocyte-associated Ig-like receptor 1
1422868_s_at	Atp6v0d2	10.8864	13.0611	10.6365	9.52479	-2.16095	Cluster 3	ATPase, H+ transporting, lysosomal V0 subunit D2
1424451_at	Krt79	10.8358	13.0645	10.1949	9.08565	-2.1574	Cluster 3	keratin 79
1425225_at	Rnase4	8.57642	10.8043	10.1225	9.01678	-2.1521	Cluster 3	ribonuclease, RNase A family 4
1426236_a_at	Tlr7	7.57871	9.27374	7.91175	6.80701	-2.15059	Cluster 3	toll-like receptor 7
1426936_at	Igj	5.26272	8.79568	7.99511	6.89639	-2.14165	Cluster 3	immunoglobulin joining chain
1427352_at	Slco2b1	8.60541	10.8424	8.86523	7.76735	-2.1404	Cluster 3	solute carrier organic anion transporter family, member 2b1
1428700_at	Perp	9.94612	12.2983	8.84813	7.75554	-2.13258	Cluster 3	PERP, TP53 apoptosis effector
1428749_at	Sh3bp5	8.25713	10.1964	9.31968	8.2271	-2.13256	Cluster 3	SH3-domain binding protein 5 (BTK-associated)
1433933_s_at	Pdgfc	7.57736	10.1136	7.89492	6.80658	-2.1263	Cluster 3	platelet-derived growth factor, C polypeptide
1435043_at	Rock2	7.46318	7.85304	7.85126	6.77453	-2.10925	Cluster 3	Rho-associated coiled-coil containing protein kinase 2
1435513_at	Tmem71	8.01115	8.80664	8.86131	7.79893	-2.08837	Cluster 3	transmembrane protein 71
1435749_at	Fpr1	9.70378	11.9524	8.75278	7.69295	-2.08469	Cluster 3	formyl peptide receptor 1
1436212_at	Sepp1	12.1032	13.3205	12.864	11.8069	-2.08078	Cluster 3	selenoprotein P, plasma, 1
1440355_at	Kctd12b	7.13227	9.24248	7.08621	6.03255	-2.07579	Cluster 3	potassium channel tetramerisation domain containing 12b
1443163_at	Clec1b	8.47861	10.2008	7.66793	6.61744	-2.07124	Cluster 3	C-type lectin domain family 1, member b
1444176_at	Mycbp2	8.01934	8.29275	8.32388	7.28692	-2.05191	Cluster 3	MYC binding protein 2
1447150_at	Gda	6.07518	7.21586	6.9424	5.90981	-2.04569	Cluster 3	guanine deaminase
1450808_at	Dmxl2	10.1228	12.371	9.79509	8.77101	-2.03366	Cluster 3	Dmx-like 2
1451041_at	Fcgr4	8.33685	10.3013	8.82612	7.80233	-2.03325	Cluster 3	Fc receptor, IgG, low affinity IV
1452141_a_at		8.31158	9.60957	8.77632	7.75436	-2.03068	Cluster 3	---
1452260_at	P2ry13	8.03121	10.4752	8.2541	7.23272	-2.02986	Cluster 3	purinergic receptor P2Y, G-protein coupled 13
1455227_at		8.55642	8.6612	8.44541	7.43044	-2.02087	Cluster 3	---
1456453_at	Glul	12.0415	12.8378	11.8929	10.8788	-2.01965	Cluster 3	glutamate-ammonia ligase (glutamine synthetase)
1418398_a_at	629242 /// BC005512 /// F630007L15Rik	5.84574	7.10141	6.74257	5.73984	-2.00378	Cluster 3	cDNA sequence BC005512 /// RIKEN cDNA F630007L15 gene /// predicted gene 6958
1424305_at	Cybb	8.41052	9.62081	9.10152	8.10025	-2.00176	Cluster 3	cytochrome b-245, beta polypeptide
1418847_at	Clec4g	6.28867	5.70145	6.57176	7.57606	2.00597	Cluster 4	C-type lectin domain family 4, member g
1421074_at	Timm8a2	4.27947	4.33479	5.36466	6.38973	2.03505	Cluster 4	translocase of inner mitochondrial membrane 8 homolog a2 (yeast)
1423566_a_at	Hspa1b	11.4216	8.05707	10.8131	11.8429	2.04171	Cluster 4	heat shock protein 1B
1429658_a_at	Smc2	8.43122	8.22818	8.22051	9.25161	2.04358	Cluster 4	structural maintenance of chromosomes 2
1433804_at	Arg2	4.76392	5.35352	5.20813	6.24448	2.05102	Cluster 4	arginase type II
1459804_at	Hsph1	12.029	10.9632	11.4013	12.4414	2.05632	Cluster 4	heat shock 105kDa/110kDa protein 1
1415824_at	Clip1	5.49622	5.38028	5.17039	6.21383	2.06114	Cluster 4	CAP-GLY domain containing linker protein 1
1419385_a_at	Casc5	6.92268	6.25959	6.35862	7.41727	2.08297	Cluster 4	cancer susceptibility candidate 5
1421075_s_at	Scd2	6.5711	6.80887	7.18609	8.26004	2.10519	Cluster 4	stearoyl-Coenzyme A desaturase 2
1425060_s_at	Crebbp	7.04693	6.75905	6.31284	7.38831	2.10742	Cluster 4	CREB binding protein
1425993_a_at	Ubqln1	6.88519	7.13541	6.83927	7.91808	2.11228	Cluster 4	ubiquilin 1
1427126_at	Adora2b /// LOC100045233	5.03336	5.30987	5.37355	6.46322	2.12825	Cluster 4	adenosine A2b receptor
1427428_at	Jak1	8.07853	8.41591	7.58395	8.74559	2.23712	Cluster 4	Janus kinase 1
1434431_x_at	Ubtf	8.49462	8.38783	7.82991	9.02191	2.28471	Cluster 4	upstream binding transcription factor, RNA polymerase I
1438833_at	Cyp7b1	5.94367	6.85448	9.88926	11.0822	2.28619	Cluster 4	cytochrome P450, family 7, subfamily b, polypeptide 1
1447997_s_at	Spp1	9.86452	11.2333	9.86239	11.0562	2.28753	Cluster 4	secreted phosphoprotein 1
1449254_at	Cyp7b1	4.29734	6.48365	9.97346	11.1785	2.30545	Cluster 4	cytochrome P450, family 7, subfamily b, polypeptide 1
1452794_x_at	Hsph1	8.62804	7.31171	7.92045	9.33958	2.67425	Cluster 4	heat shock 105kDa/110kDa protein 1
1460304_a_at	EG545728 /// EG623898 /// Speer1-ps1	4.48989	4.51988	5.15158	7.50392	5.10651	Cluster 4	RIKEN cDNA 4933402N22 gene /// predicted gene 5861 /// predicted gene 6460 /// spermatogenesis associated glutamate (E)-rich protein 1, pseudogene 1

## Sheet: Suppl. Table 3
Annotation		Normalized log2 signal intensities						Fold change	Cluster information	Gene description
ProbeName	GeneSymbol	Asthma CD8- lung DC	Contr CD8- lung DC	Asthma CD8+ lung DC	Contr CD8+ lung DC	Asthma total BLN DC	Contr total BLN DC	Asthma total BLN DC vs. Contr total BLN DC Total: 726 (up: 465, down: 261)	K-means cluster #	Description
1424631_a_at	Ighg	6.81438	6.33313	6.58699	7.0595	9.64668	6.90855	6.67203	Cluster 1	Immunoglobulin heavy chain (gamma polypeptide)
1427870_x_at	Igh	8.07383	7.59098	7.90043	7.96979	10.259	8.20201	4.1611	Cluster 1	Immunoglobulin heavy chain 6 (heavy chain of IgM)
1436591_at	BC023744	5.93821	6.41617	7.50805	7.56103	8.61733	6.76134	3.62	Cluster 1	V-set and immunoglobulin domain containing 10
1418209_a_at	Pfn2	4.74855	5.56216	5.43576	5.57046	6.89378	5.05778	3.57017	Cluster 1	profilin 2
1445298_at		5.37241	5.70092	5.7373	5.24541	6.84763	5.07861	3.40822	Cluster 1	cell division cycle associated 2
1425324_x_at	Igh	5.0696	5.16032	5.29013	5.21673	7.7985	6.15431	3.12573	Cluster 1	Immunoglobulin heavy chain 6 (heavy chain of IgM)
1460465_at	A930038C07Rik	6.81556	7.19617	7.28037	7.71094	8.58357	6.96267	3.07569	Cluster 1	RIKEN cDNA A930038C07 gene
1449824_at	Prg4	4.72834	5.21903	5.37043	4.82622	7.26922	5.68163	3.00546	Cluster 1	proteoglycan 4 (megakaryocyte stimulating factor, articular superficial zone protein)
1444893_at		5.79724	5.85451	5.72168	5.84199	7.53923	5.97828	2.95049	Cluster 1	---
1459807_x_at	P4htm	4.82121	4.98239	4.84206	4.96503	6.89861	5.33925	2.94724	Cluster 1	prolyl 4-hydroxylase, transmembrane (endoplasmic reticulum)
1435774_at	LOC106740	5.45005	5.84592	5.33274	5.51863	6.70154	5.18325	2.86451	Cluster 1	hypothetical LOC106740
1423932_at	Cugbp1	6.02832	5.70906	6.01946	6.12844	7.48993	6.04832	2.71623	Cluster 1	CUGBP, Elav-like family member 1
1424358_at	Ube2e2	6.02278	6.45892	6.74314	6.6929	8.7154	7.2779	2.70852	Cluster 1	ubiquitin-conjugating enzyme E2E 2 (UBC4/5 homolog, yeast)
1437056_x_at	Crispld2	7.79246	7.55714	9.21111	9.05691	11.6788	10.243	2.70527	Cluster 1	cysteine-rich secretory protein LCCL domain containing 2
1425247_a_at	Igh /// Ighg1	5.90021	5.72239	5.928	6.11525	8.66301	7.23359	2.69339	Cluster 1	immunoglobulin heavy constant gamma 1 (G1m marker)
1430711_at	4933416E03Rik	4.70685	4.80443	4.867	4.70411	6.15382	4.74938	2.64714	Cluster 1	RIKEN cDNA 4933416E03 gene
1425597_a_at	Qk	6.05535	5.79144	6.02822	5.90935	7.48128	6.08685	2.62885	Cluster 1	quaking
1442298_at		6.01336	5.9017	6.07429	5.93718	7.31498	5.92932	2.61293	Cluster 1	---
1431855_at	4930570E03Rik	4.80738	4.96442	4.87937	4.87652	6.27705	4.8967	2.60331	Cluster 1	RIKEN cDNA 4930570E03 gene
1454218_at	4930405D01Rik	5.23189	4.94759	5.03801	4.80185	6.48437	5.11231	2.58839	Cluster 1	RIKEN cDNA 4930405D01 gene
1428420_a_at	1200009I06Rik	6.18492	6.09687	6.44781	6.31195	8.37427	7.01849	2.55935	Cluster 1	RIKEN cDNA 1200009I06 gene
1437097_at	Zbed3	5.16498	4.88867	4.87811	5.07842	6.65256	5.30014	2.55339	Cluster 1	zinc finger, BED domain containing 3
1420692_at	Il2ra	5.16852	5.55696	5.50957	6.2203	7.02075	5.67193	2.54704	Cluster 1	interleukin 2 receptor, alpha chain
1441206_at	Synpo2	5.66325	5.78116	5.92229	6.63425	8.39823	7.09113	2.47444	Cluster 1	synaptopodin 2
1440710_at	Zfp706	5.56337	5.80659	5.5867	5.54324	7.29781	5.9913	2.47343	Cluster 1	zinc finger protein 706
1432055_at	Sash1	5.54362	5.43268	5.50571	5.57622	6.66755	5.37112	2.4562	Cluster 1	SAM and SH3 domain containing 1
1441646_at	Vta1	6.17004	5.95753	6.50582	6.0202	7.13987	5.86124	2.4261	Cluster 1	Vps20-associated 1 homolog (S. cerevisiae)
1454232_at	9430027B09Rik	5.38808	5.26289	5.53095	5.57414	6.65407	5.37946	2.41933	Cluster 1	RIKEN cDNA 9430027B09 gene
1419313_at	Ccnt1 /// LOC100047121	6.0414	6.29188	6.31039	6.34001	7.24174	5.97171	2.41167	Cluster 1	cyclin T1
1434243_s_at	Tomm70a	6.09694	6.56722	6.71009	6.34189	7.43733	6.17136	2.40489	Cluster 1	translocase of outer mitochondrial membrane 70 homolog A (yeast)
1427195_at		7.21923	6.98751	7.40784	7.61105	8.6442	7.38175	2.39903	Cluster 1	solute carrier family 26 (sulfate transporter), member 2
1460074_x_at	Epdr1	5.05206	4.69654	5.12221	5.10439	7.07925	5.82097	2.3921	Cluster 1	ependymin related protein 1 (zebrafish)
1441227_at		5.91424	6.02553	6.11873	6.06164	6.94897	5.69703	2.38162	Cluster 1	---
1451699_at	B230354O11Rik	4.89138	4.99794	5.13176	4.82939	6.32104	5.07236	2.37623	Cluster 1	RIKEN cDNA B230354O11 gene
1451375_at	Ehf	5.12533	5.64469	5.60946	5.86235	7.32984	6.09366	2.35575	Cluster 1	ets homologous factor
1438037_at	Herc5	8.05137	8.36641	8.851	8.88825	9.88851	8.65535	2.35081	Cluster 1	hect domain and RLD 6
1433173_at	5430440L12Rik	6.2717	6.3326	6.52872	6.1683	7.28587	6.0598	2.33928	Cluster 1	RIKEN cDNA 5430440L12 gene
1433575_at	Sox4	4.90169	4.71012	5.73751	6.4466	6.94732	5.73751	2.31308	Cluster 1	SRY-box containing gene 4
1460599_at	Ermp1	6.63762	5.99341	6.30558	6.20345	7.07948	5.87169	2.30983	Cluster 1	endoplasmic reticulum metallopeptidase 1
1422086_at	Tbx19	6.06775	5.69431	6.23816	5.79358	7.48519	6.29003	2.28971	Cluster 1	T-box 19
1432235_at	Epsti1	6.30691	6.48778	6.71785	6.70764	8.58663	7.39596	2.2826	Cluster 1	epithelial stromal interaction 1 (breast)
1430910_at	4930544L04Rik	4.72724	4.8038	5.01078	4.62172	6.18652	4.99805	2.2791	Cluster 1	RIKEN cDNA 4930544L04 gene
1431181_a_at	Luc7l	7.54004	8.27876	8.2871	8.08188	9.3659	8.17916	2.27638	Cluster 1	Luc7 homolog (S. cerevisiae)-like
1429567_at	Rassf10	5.51029	5.60266	5.73018	5.51535	6.49835	5.31351	2.27338	Cluster 1	Ras association (RalGDS/AF-6) domain family (N-terminal) member 10
1439935_at	Plac1l	4.90061	4.92474	4.87828	4.88263	6.12084	4.94017	2.26682	Cluster 1	placenta-specific 1-like
1428066_at	Ccdc120	5.0512	5.03135	5.07014	5.25869	6.08814	4.90855	2.26513	Cluster 1	coiled-coil domain containing 120
1455366_at	Mrpl52	5.13361	5.14484	5.35062	5.27433	6.52643	5.34924	2.26136	Cluster 1	mitochondrial ribosomal protein L52
1424940_s_at	BC022687	5.54001	5.4137	5.31486	5.41654	6.30447	5.14494	2.23384	Cluster 1	cDNA sequence BC022687
1421194_at	Itga4	7.39648	8.12732	7.85974	8.03509	8.69541	7.5398	2.22778	Cluster 1	integrin alpha 4
1420823_at	Sema4d	6.1514	5.9347	6.2383	5.84979	7.224	6.0686	2.22746	Cluster 1	sema domain, immunoglobulin domain (Ig), transmembrane domain (TM) and short cytoplasmic domain, (semaphorin) 4D
1432350_at	Sync	5.99299	6.06321	6.31752	6.01368	7.39979	6.25082	2.21756	Cluster 1	syncoilin
1458180_at		8.20935	8.04509	8.14676	8.09987	9.63023	8.48384	2.21358	Cluster 1	---
1452087_at	Epsti1	9.34425	10.3178	10.8653	11.1963	11.8056	10.6625	2.20864	Cluster 1	epithelial stromal interaction 1 (breast)
1440195_at	Serbp1	5.74426	6.17628	6.10831	6.49513	7.03193	5.88962	2.20734	Cluster 1	serpine1 mRNA binding protein 1
1416784_at	Pgk2	5.00387	4.83078	5.06759	5.11308	5.87297	4.7308	2.20713	Cluster 1	phosphoglycerate kinase 2
1436068_at	Zbtb10	6.19702	6.29214	6.50433	6.48656	8.36966	7.23057	2.20243	Cluster 1	zinc finger and BTB domain containing 10
1440120_at	Gnb2l1	6.34576	6.08825	6.34413	6.33927	7.54435	6.40787	2.19845	Cluster 1	---
1425806_a_at	Med21	7.01637	6.52998	7.03594	6.4457	7.74434	6.61908	2.1814	Cluster 1	mediator complex subunit 21
1433863_at	Btf3 /// EG666196 /// EG668700	5.37906	6.10273	5.51327	5.85764	6.53585	5.41129	2.18035	Cluster 1	basic transcription factor 3
1427455_x_at	EG637227 /// ENSMUSG00000076577 /// Gm1420 /// Igk /// Igk-C /// Igk-V28 /// LOC100047628	10.14	5.67149	9.78629	11.9904	11.0813	9.95759	2.1791	Cluster 1	predicted gene 10883 /// predicted gene 1420 /// predicted gene 7202 /// immunoglobulin kappa chain, constant region /// immunoglobulin kappa chain, joining region, 1 /// immunoglobulin kappa chain variable 28 (V28)
1437315_at	Gpr172b	5.95068	6.45549	6.35346	6.25411	7.40408	6.28287	2.1753	Cluster 1	G protein-coupled receptor 172B
1425570_at	Slamf1	6.005	5.95946	6.59612	6.46267	7.52685	6.40589	2.17492	Cluster 1	signaling lymphocytic activation molecule family member 1
1456418_at	Kcnj13	5.12426	5.25416	5.51729	5.16828	6.23152	5.11532	2.16775	Cluster 1	potassium inwardly-rectifying channel, subfamily J, member 13
1437549_at	2810408I11Rik	6.08595	6.18484	6.23338	6.1465	7.19777	6.08534	2.16208	Cluster 1	RIKEN cDNA 2810408I11 gene
1423378_at	Adam23 /// LOC100046035	7.24749	8.19581	8.65536	8.56086	9.51804	8.40943	2.15638	Cluster 1	a disintegrin and metallopeptidase domain 23
1429029_at	Sgms2	5.92007	5.06635	4.76303	5.05052	6.10883	5.00525	2.14887	Cluster 1	sphingomyelin synthase 2
1457885_at		6.01864	6.5778	6.08919	5.80073	7.17589	6.07253	2.14853	Cluster 1	---
1454849_x_at	Clu /// LOC100046120	7.6318	7.99542	9.66261	9.327	11.1058	10.0027	2.1481	Cluster 1	clusterin
1441505_at		6.61781	7.0852	6.73236	6.85114	7.68062	6.57835	2.14691	Cluster 1	---
1436426_at	Cc2d2a	5.22051	5.43193	5.65625	5.64073	7.06221	5.96145	2.14469	Cluster 1	coiled-coil and C2 domain containing 2A
1420987_at	Kif3b	7.01236	7.02646	7.10499	7.07339	7.88891	6.7883	2.14446	Cluster 1	kinesin family member 3B
1458504_at	Zc3h12d	6.68436	7.46359	7.57126	7.86044	8.32609	7.23015	2.13753	Cluster 1	zinc finger CCCH type containing 12D
1436727_x_at	Sptlc1	5.56555	5.48814	5.62238	5.55126	6.48487	5.39069	2.13492	Cluster 1	serine palmitoyltransferase, long chain base subunit 1
1429891_at	Capsl	4.7017	4.58084	5.02327	4.8381	5.68937	4.59696	2.1323	Cluster 1	calcyphosine-like
1423980_at	Slc25a29	5.51435	5.63625	6.40462	6.1541	7.21102	6.12381	2.12462	Cluster 1	solute carrier family 25 (mitochondrial carrier, palmitoylcarnitine transporter), member 29
1432390_at	4933400F21Rik	5.53749	5.22595	5.25366	5.24778	6.3266	5.23985	2.12395	Cluster 1	RIKEN cDNA 4933400F21 gene
1441035_at	Kcne1	5.55313	5.41502	5.46609	5.48395	6.70856	5.62235	2.12316	Cluster 1	potassium voltage-gated channel, Isk-related subfamily, member 1
1430692_a_at	Sel1l	6.95172	6.40935	6.8305	6.62014	7.43746	6.35137	2.12299	Cluster 1	sel-1 suppressor of lin-12-like (C. elegans)
1417389_at	Gpc1	5.99217	6.24778	6.62164	6.94039	7.73579	6.65153	2.12029	Cluster 1	glypican 1
1447115_at	Slc26a10	5.13214	5.50769	5.45423	5.33417	6.53472	5.45175	2.1184	Cluster 1	Solute carrier family 26, member 10
1448681_at	Il15ra	8.07937	8.19663	8.20488	8.53413	9.74357	8.66084	2.11803	Cluster 1	interleukin 15 receptor, alpha chain
1440874_at	Slco5a1	5.14838	6.08891	6.80926	7.54815	8.64624	7.56679	2.11322	Cluster 1	solute carrier organic anion transporter family, member 5A1
1444565_at	BB166591	5.91405	6.06629	5.82631	5.83809	6.80835	5.73119	2.10988	Cluster 1	expressed sequence BB166591
1444028_s_at	Dock9	6.33716	6.72776	7.60194	7.2007	8.38324	7.30957	2.10478	Cluster 1	dedicator of cytokinesis 9
1425276_at	Fbrs	4.85108	4.90275	4.96734	4.84832	5.73203	4.66201	2.09947	Cluster 1	fibrosin
1441706_at	Dscaml1	5.19457	4.80488	5.81116	5.67117	6.84618	5.77633	2.09922	Cluster 1	Down syndrome cell adhesion molecule-like 1
1444522_at		5.77413	5.35263	5.63151	5.59447	7.086	6.01903	2.09503	Cluster 1	---
1442510_at	LOC622307	5.72667	6.06941	6.12816	5.72194	7.11477	6.05251	2.08819	Cluster 1	alpha-fetoprotein-like
1418282_x_at	Serpina1b	5.0998	5.15404	5.30083	4.72918	7.73711	6.67524	2.08764	Cluster 1	serine (or cysteine) preptidase inhibitor, clade A, member 1B
1451446_at	Antxr1	4.64348	4.89243	4.70615	4.8967	6.29781	5.23868	2.08367	Cluster 1	anthrax toxin receptor 1
1427392_at	Dscaml1	5.01017	5.21222	6.27258	5.66469	7.32454	6.2668	2.08166	Cluster 1	Down syndrome cell adhesion molecule-like 1
1452081_a_at	9130017N09Rik	6.21094	6.3876	6.3774	6.22993	7.69982	6.64215	2.08156	Cluster 1	RIKEN cDNA 9130017N09 gene
1427466_at	Pigu	5.60456	5.66783	5.79305	5.6031	6.67916	5.62446	2.07728	Cluster 1	phosphatidylinositol glycan anchor biosynthesis, class U
1419328_at	Sema4f	7.17532	7.64362	7.49129	7.56908	8.67318	7.62068	2.07411	Cluster 1	sema domain, immunoglobulin domain (Ig), TM domain, and short cytoplasmic domain
1451474_a_at	Parp8	9.04139	9.82985	9.40267	9.15074	10.2015	9.15434	2.06643	Cluster 1	poly (ADP-ribose) polymerase family, member 8
1431972_a_at	Gcap14	7.03211	7.17058	7.70163	7.68897	9.04116	7.9944	2.06589	Cluster 1	granule cell antiserum positive 14
1458915_at	C77949	5.63132	5.72963	5.63517	5.69399	6.85974	5.81481	2.06328	Cluster 1	expressed sequence C77949
1421687_at	Msmb	4.861	4.75221	4.74416	4.93191	6.14058	5.09638	2.06223	Cluster 1	beta-microseminoprotein
1454069_at	9030409C19Rik	5.68621	6.04945	5.92335	6.07079	6.85942	5.81703	2.05964	Cluster 1	RIKEN cDNA 9030409C19 gene
1430640_a_at	Prkar2b	8.68111	7.94189	6.95919	7.06344	8.38433	7.34221	2.05925	Cluster 1	protein kinase, cAMP dependent regulatory, type II beta
1431773_at	Cbx1	5.49189	5.65259	5.58294	5.67274	6.56829	5.52761	2.0572	Cluster 1	chromobox homolog 1 (Drosophila HP1 beta)
1419242_at	9530002B09Rik	4.96289	5.01211	5.15612	5.04492	5.8558	4.81665	2.05503	Cluster 1	RIKEN cDNA 9530002B09 gene
1419535_at	Slco6b1	4.87001	4.55701	4.63743	4.68384	5.90844	4.87001	2.05399	Cluster 1	solute carrier organic anion transporter family, member 6b1
1438188_x_at	Slc25a29	7.53107	7.32804	8.46464	8.31192	9.17282	8.13742	2.04968	Cluster 1	solute carrier family 25 (mitochondrial carrier, palmitoylcarnitine transporter), member 29
1430963_at	Gcnt3	4.55394	4.93668	4.69632	4.78122	5.83895	4.80469	2.04806	Cluster 1	glucosaminyl (N-acetyl) transferase 3, mucin type
1456756_at	E430016P22Rik	6.17699	6.32498	6.15897	6.32334	7.38423	6.35121	2.0463	Cluster 1	zinc finger CCCH-type, antiviral 1-like
1447741_x_at	Acad10	5.95788	6.07735	6.35311	6.19244	7.3766	6.34616	2.04264	Cluster 1	acyl-Coenzyme A dehydrogenase family, member 10
1424164_at	Mrpl50	7.40926	7.19669	7.40454	7.09895	8.07066	7.04055	2.04218	Cluster 1	mitochondrial ribosomal protein L50
1456218_at	Snx22	7.01671	7.91383	7.40251	7.3794	8.68203	7.65219	2.04181	Cluster 1	sorting nexin 22
1442221_at		5.14439	5.36864	5.28368	5.17084	6.08349	5.05519	2.03962	Cluster 1	---
1421856_at	S100a3	4.96416	4.83128	4.956	5.00339	5.91794	4.89521	2.03175	Cluster 1	S100 calcium binding protein A3
1421155_at	B3galt6	7.461	7.53146	7.71004	7.47579	8.58039	7.55874	2.03025	Cluster 1	UDP-Gal:betaGal beta 1,3-galactosyltransferase, polypeptide 6
1430093_at	4933406P04Rik	5.08163	5.15252	4.97597	5.11731	5.97029	4.94922	2.02942	Cluster 1	RIKEN cDNA 4933406P04 gene
1420210_at	Slc8a1	4.79071	5.00473	4.76901	4.89931	6.85033	5.83655	2.01918	Cluster 1	solute carrier family 8 (sodium/calcium exchanger), member 1
1421919_a_at	Ccr9	4.8938	4.91596	5.14086	5.11817	6.17107	5.15905	2.01674	Cluster 1	chemokine (C-C motif) receptor 9
1448487_at	Lrrfip1	8.16672	7.87241	7.72133	7.85263	8.62261	7.61156	2.01538	Cluster 1	leucine rich repeat (in FLII) interacting protein 1
1450229_at	Med14	5.84054	5.85652	5.97597	5.77008	6.90751	5.89787	2.0134	Cluster 1	mediator complex subunit 14
1420293_at	Lpcat1	5.54462	5.90691	5.85658	5.661	7.51716	6.50973	2.01032	Cluster 1	lysophosphatidylcholine acyltransferase 1
1422031_a_at	Zfand6	8.74037	8.69678	9.0592	8.98934	9.93417	8.92736	2.00947	Cluster 1	zinc finger, AN1-type domain 6
1416322_at	Prelp	5.29258	5.31477	5.5195	5.60049	6.82576	5.81939	2.00886	Cluster 1	proline arginine-rich end leucine-rich repeat
1451539_at	Baiap2l1	5.06113	5.19084	5.12419	5.1983	6.45541	5.44971	2.00791	Cluster 1	BAI1-associated protein 2-like 1
1424982_a_at	2700078E11Rik	6.54181	6.71374	7.00311	6.83419	7.62297	6.62262	2.00049	Cluster 1	RIKEN cDNA 2700078E11 gene
1429197_s_at	Rabgap1l	7.65761	9.20624	8.81314	9.04637	8.72233	6.3489	5.18173	Cluster 2	RAB GTPase activating protein 1-like
1455483_at	Zfp148	7.29117	7.81953	7.48057	7.74582	7.76098	5.92168	3.57836	Cluster 2	zinc finger protein 148
1418219_at	Il15	7.80705	8.43706	7.6626	8.32426	8.76077	6.98372	3.42724	Cluster 2	interleukin 15
1418776_at	5830443L24Rik	9.02238	8.10983	8.67036	9.31511	9.42326	7.67499	3.35956	Cluster 2	guanylate-binding protein 8
1423566_a_at	Hsph1	7.31171	8.62804	9.33958	7.92045	8.72654	7.01276	3.28018	Cluster 2	heat shock 105kDa/110kDa protein 1
1434267_at	Nek1	8.22479	8.36905	8.15008	8.35248	8.60491	6.93694	3.17767	Cluster 2	NIMA (never in mitosis gene a)-related expressed kinase 1
1454014_a_at	Mkks	6.48715	6.4837	6.38108	6.4837	7.24851	5.62606	3.07897	Cluster 2	McKusick-Kaufman syndrome protein
1450276_a_at	Scin	6.99223	8.55244	9.28374	9.58101	8.14085	6.5351	3.04353	Cluster 2	scinderin
1444241_at	Wac	7.5929	7.4654	7.12685	7.77198	7.98978	6.40289	3.00401	Cluster 2	WW domain containing adaptor with coiled-coil
1452113_a_at	Rab23	6.64586	6.97686	6.99614	6.78334	7.49491	5.919	2.98124	Cluster 2	RAB23, member RAS oncogene family
1452714_at	Tanc1	6.83842	7.47631	6.1996	6.85176	7.17706	5.60729	2.96857	Cluster 2	tetratricopeptide repeat, ankyrin repeat and coiled-coil containing 1
1428453_at	Nat12	8.67597	9.17341	8.94273	9.19576	9.18636	7.63477	2.9314	Cluster 2	N(alpha)-acetyltransferase 30, NatC catalytic subunit
1440721_at	5930433N17Rik	8.40439	9.10829	8.159	8.699	9.06502	7.54252	2.87288	Cluster 2	RIKEN cDNA 5930433N17 gene
1457560_at		6.33723	6.44519	6.30659	6.25342	7.13302	5.62448	2.84522	Cluster 2	---
1424559_at	Rpap2	7.54066	7.3804	7.52496	7.34866	8.06088	6.55559	2.83883	Cluster 2	RNA polymerase II associated protein 2
1419549_at	Arg1	8.63181	5.72556	12.0649	11.5566	9.32249	7.84249	2.78949	Cluster 2	arginase, liver
1428947_at	2010001M09Rik	7.55671	6.68665	7.45394	9.20335	8.84698	7.37535	2.77335	Cluster 2	RIKEN cDNA 2010001M09 gene
1420338_at	Alox15	7.44767	5.24994	7.52829	7.80143	6.84184	5.3758	2.76262	Cluster 2	arachidonate 15-lipoxygenase
1436161_at	Pds5b	8.15008	8.5535	8.49992	8.55653	9.15913	7.73928	2.67558	Cluster 2	PDS5, regulator of cohesion maintenance, homolog B (S. cerevisiae)
1449444_a_at	LOC100048499 /// Mfap1a /// Mfap1b	8.23512	8.43182	8.48703	8.28857	8.73444	7.32533	2.65573	Cluster 2	hypothetical LOC100048499 /// microfibrillar-associated protein 1A /// microfibrillar-associated protein 1B
1430133_at	Tbc1d8b	7.60076	7.99571	7.55711	7.98627	7.8887	6.48477	2.64622	Cluster 2	TBC1 domain family, member 8B
1452945_at	Zfp157	7.59835	8.44308	7.20429	7.68204	8.09821	6.69722	2.64083	Cluster 2	zinc finger protein 157
1455166_at	Arl5b	8.09427	8.27934	8.24571	8.54267	9.20694	7.817	2.62069	Cluster 2	ADP-ribosylation factor-like 5B
1454890_at	Amot	6.80599	8.19561	7.71476	7.89957	8.07243	6.68496	2.61619	Cluster 2	angiomotin
1429347_at	Bcl2l14	6.67062	7.19547	8.20602	8.13793	8.33975	6.96562	2.59211	Cluster 2	BCL2-like 14 (apoptosis facilitator)
1439790_at	Serpinb9	7.24537	7.52937	7.97463	8.90195	8.94508	7.57753	2.58032	Cluster 2	serine (or cysteine) peptidase inhibitor, clade B, member 9
1418021_at	C4b	7.48111	7.5067	7.27929	8.71225	8.38344	7.02844	2.55797	Cluster 2	complement component 4B (Childo blood group)
1422789_at	Aldh1a2	9.4164	9.6443	10.9323	10.7092	10.3538	9.00475	2.54744	Cluster 2	aldehyde dehydrogenase family 1, subfamily A2
1460247_a_at	Skp2	7.79104	8.07193	8.40423	8.074	8.52968	7.19556	2.52122	Cluster 2	S-phase kinase-associated protein 2 (p45)
1427660_x_at	EG637227 /// ENSMUSG00000076577 /// Gm1420 /// Igk /// Igk-C /// Igk-V28 /// LOC100047628	10.3266	4.93379	9.8036	12.1165	10.2825	8.95518	2.50939	Cluster 2	predicted gene 10883 /// predicted gene 1420 /// predicted gene 7202 /// immunoglobulin kappa chain, constant region /// immunoglobulin kappa chain, joining region, 1 /// immunoglobulin kappa chain variable 28 (V28)
1436223_at		5.0138	5.98956	6.11749	6.86232	5.8	4.48852	2.48195	Cluster 2	integrin beta 8
1422804_at	Serpinb6b	8.29789	9.21186	10.3946	10.7769	10.6589	9.35204	2.47407	Cluster 2	serine (or cysteine) peptidase inhibitor, clade B, member 6b
1424202_at	Seh1l	9.09541	9.23064	9.40398	9.3184	9.71623	8.41173	2.46999	Cluster 2	SEH1-like (S. cerevisiae
1455613_at	E130308A19Rik	6.12771	6.26583	6.59835	6.30304	6.76028	5.47027	2.44529	Cluster 2	RIKEN cDNA E130308A19 gene
AFFX-BioDn-5_at		11.1922	11.2115	11.3012	11.0129	11.335	10.0615	2.41744	Cluster 2	---
1448853_at	Synj2bp	8.89028	9.15694	8.61304	9.14742	9.22069	7.94729	2.41729	Cluster 2	synaptojanin 2 binding protein
1431802_a_at	D5Wsu178e	8.43986	8.91961	8.45775	8.65304	8.85106	7.58335	2.4078	Cluster 2	ethanolaminephosphotransferase 1 (CDP-ethanolamine-specific)
1457265_at	Sfrs17b	7.18601	8.26357	7.35296	7.75509	7.78995	6.55654	2.35122	Cluster 2	A kinase (PRKA) anchor protein 17B
1433470_a_at	Immt	9.7163	9.16947	9.35507	9.43404	9.78421	8.5648	2.32852	Cluster 2	inner membrane protein, mitochondrial
1422445_at	Itga6	7.79104	6.70347	8.08002	7.794	8.37506	7.16449	2.31428	Cluster 2	integrin alpha 6
1439448_x_at	Tmed9	11.6491	11.3103	11.3467	11.3021	11.93	10.7195	2.31423	Cluster 2	transmembrane emp24 protein transport domain containing 9
1434666_at	LOC100048247	8.39515	8.58257	9.13859	9.51369	9.23355	8.02346	2.31353	Cluster 2	polycomb group ring finger 5
1427258_at	Trim24	7.35631	8.09187	7.99884	7.93938	8.51309	7.30466	2.31086	Cluster 2	tripartite motif-containing 24
1418628_at	Khdrbs1	8.63918	8.91697	8.90057	8.82594	9.14742	7.94392	2.30298	Cluster 2	KH domain containing, RNA binding, signal transduction associated 1
1429769_at	Pggt1b	7.46148	7.58316	7.64746	7.70985	8.31222	7.12167	2.28239	Cluster 2	protein geranylgeranyltransferase type I, beta subunit
1424445_at	Tm4sf5	6.75387	7.72763	8.48445	8.46094	8.61027	7.4316	2.26367	Cluster 2	transmembrane 4 superfamily member 5
1452430_s_at	LOC100048559 /// Sfrs1	6.40625	6.74657	7.05212	6.64408	7.09034	5.91216	2.26291	Cluster 2	serine/arginine-rich splicing factor 1
1448796_s_at	LOC100046166 /// Tbrg4	7.22133	7.00344	7.46935	7.0738	7.43798	6.2629	2.25805	Cluster 2	protein TBRG4-like /// transforming growth factor beta regulated gene 4
1417173_at	Atf6b	7.28107	7.24527	7.34297	7.19878	7.68906	6.5141	2.25785	Cluster 2	activating transcription factor 6 beta
1419866_s_at	Atxn2 /// LOC100047323	6.25049	6.51629	6.71854	6.441	6.89399	5.72349	2.25089	Cluster 2	ataxin 2
1423324_at	Pnn	10.3284	10.4133	10.4627	10.4833	10.704	9.54476	2.2334	Cluster 2	pinin
1451340_at	Arid5a	6.68621	6.67267	7.70618	7.79543	7.64416	6.48566	2.23225	Cluster 2	AT rich interactive domain 5A (MRF1-like)
1443949_at		7.66288	8.33607	7.55995	8.20067	8.30311	7.14656	2.22924	Cluster 2	---
1431743_a_at	Slc4a1	5.74908	6.05069	5.84794	5.62477	6.09446	4.939	2.22756	Cluster 2	solute carrier family 4 (anion exchanger), member 1
1419038_a_at	Csnk2a1 /// ENSMUSG00000057808	7.6728	7.54783	8.1382	7.85396	8.16925	7.02174	2.21531	Cluster 2	casein kinase 2, alpha 1 polypeptide
1459876_at		7.67259	8.76471	8.34666	9.07824	8.36962	7.22607	2.20925	Cluster 2	---
1440671_at	A130012E19Rik	6.8055	7.61752	6.83422	7.85675	8.03159	6.89744	2.19488	Cluster 2	RIKEN cDNA A130012E19 gene
1438418_at	Mudeng	8.02752	8.09932	7.71681	7.90026	8.20917	7.07545	2.19425	Cluster 2	MU-2/AP1M2 domain containing, death-inducing
1452789_at	Snn	9.11366	7.96079	9.0493	9.67003	9.44582	8.31292	2.19298	Cluster 2	stannin
1420776_a_at	Auh	8.93665	8.3746	8.96869	8.72244	8.87415	7.74253	2.19105	Cluster 2	AU RNA binding protein/enoyl-coenzyme A hydratase
1455329_at		5.19874	5.34793	5.33562	5.12503	5.83958	4.70863	2.19003	Cluster 2	---
1420436_x_at	LOC100048071 /// Tex21	5.41502	5.85473	5.30755	5.51617	6.27396	5.14998	2.17948	Cluster 2	testis expressed gene 21
1423614_at	Lrrc8c	8.20409	9.39652	9.18442	9.05367	9.57693	8.45399	2.1779	Cluster 2	leucine rich repeat containing 8 family, member C
1449552_at	Zfr	4.93761	5.13168	5.24871	5.2149	5.80933	4.68673	2.17738	Cluster 2	zinc finger RNA binding protein
1436324_at	Stard9	7.94438	8.32286	8.04509	8.27273	8.55919	7.43763	2.17583	Cluster 2	START domain containing 9
1423466_at	Ccr7	9.61393	10.7629	11.6445	11.6226	11.4238	10.3038	2.17356	Cluster 2	chemokine (C-C motif) receptor 7
1426879_at	1190005F20Rik	8.2307	8.35041	8.61577	8.28139	8.87395	7.7545	2.17264	Cluster 2	RIKEN cDNA 1190005F20 gene
1455179_at	Mpp7	6.55373	6.30212	6.45133	6.44087	6.97039	5.8535	2.16878	Cluster 2	membrane protein, palmitoylated 7 (MAGUK p55 subfamily member 7)
1448309_at	Ap3m1	6.65464	6.1244	5.93114	5.90674	6.65756	5.54372	2.16422	Cluster 2	adaptor-related protein complex 3, mu 1 subunit
1438498_at	Zmynd15	8.44852	9.55875	10.0061	10.3458	10.0759	8.96588	2.15851	Cluster 2	zinc finger, MYND-type containing 15
1435548_at	Mrs2	6.92999	6.51186	7.16538	6.28465	6.98144	5.87259	2.15673	Cluster 2	MRS2 magnesium homeostasis factor homolog (S. cerevisiae)
1429557_at	Mcm8	6.36515	6.5288	7.25112	6.57068	6.63408	5.52829	2.15216	Cluster 2	minichromosome maintenance deficient 8 (S. cerevisiae)
1434442_at	Stbd1	6.83235	7.84385	7.91096	7.63596	7.92181	6.81809	2.14909	Cluster 2	starch binding domain 1
1460063_at	D5Ertd798e	5.60656	6.4972	5.68315	6.0805	6.11797	5.01536	2.14742	Cluster 2	DNA segment, Chr 5, ERATO Doi 798, expressed
1438430_at	Hbp1	9.76392	9.84204	9.72516	9.82847	10.0989	8.99678	2.14672	Cluster 2	high mobility group box transcription factor 1
1449944_a_at	Sec61a2	6.41428	6.26871	6.49219	6.61882	7.02308	5.928	2.13624	Cluster 2	Sec61, alpha subunit 2 (S. cerevisiae)
1418128_at	Adcy6	8.54872	9.86992	9.78451	10.1945	10.4384	9.344	2.13525	Cluster 2	adenylate cyclase 6
1452506_a_at	Ilkap	7.77433	7.68913	7.74623	7.72486	8.01545	6.93309	2.1175	Cluster 2	integrin-linked kinase-associated serine/threonine phosphatase 2C
1428450_at	2610034B18Rik	8.14638	8.26107	8.46581	8.57972	8.97967	7.89775	2.11685	Cluster 2	RIKEN cDNA 2610034B18 gene
1448838_at	Topors	9.72264	9.74564	9.68053	9.67248	9.99471	8.91881	2.10803	Cluster 2	topoisomerase I binding, arginine/serine-rich
1427536_at		7.05485	6.7686	6.92365	6.71793	7.45708	6.38371	2.10435	Cluster 2	predicted gene 10330 /// zinc finger protein 125
1442417_at	Med8	7.37039	7.39957	7.25875	7.47973	7.86439	6.796	2.09709	Cluster 2	mediator of RNA polymerase II transcription, subunit 8 homolog (yeast)
1423942_a_at	Camk2g /// LOC100045547	6.59372	6.18091	6.31022	6.25262	6.92438	5.85692	2.09573	Cluster 2	calcium/calmodulin-dependent protein kinase II gamma
1422741_a_at	Bbx	6.05851	6.01805	6.30781	5.84347	6.29113	5.22598	2.09238	Cluster 2	bobby sox homolog (Drosophila)
1435593_x_at	Rps7	12.3166	12.6196	12.456	12.5316	12.9401	11.8753	2.09188	Cluster 2	ribosomal protein S7
1415909_at	Stip1	8.86907	8.96631	9.97036	9.02525	9.26113	8.19969	2.08702	Cluster 2	stress-induced phosphoprotein 1
1435662_at	Nkap	8.74204	8.74932	8.68504	8.78612	9.00198	7.94778	2.07657	Cluster 2	NFKB activating protein
1429215_at	2310058N22Rik	7.82379	8.2608	7.11878	7.84542	8.14838	7.09584	2.07418	Cluster 2	RIKEN cDNA 2310058N22 gene
1427084_a_at	Map4k5	6.74609	7.87834	6.90118	7.26588	7.65787	6.60651	2.07247	Cluster 2	mitogen-activated protein kinase kinase kinase kinase 5
1450619_x_at		6.11843	6.03784	6.16614	5.97268	6.72059	5.67008	2.07126	Cluster 2	---
1428539_at	Smg1	9.35065	9.89025	9.26609	10.0186	9.95235	8.90247	2.07037	Cluster 2	SMG1 homolog, phosphatidylinositol 3-kinase-related kinase (C. elegans)
1441428_at		5.67353	5.78425	5.62326	5.63176	6.05724	5.0074	2.0703	Cluster 2	hypothetical LOC100045066
1428946_at	Uba6	7.94314	8.67459	8.35226	8.27862	8.37151	7.32183	2.07006	Cluster 2	ubiquitin-like modifier activating enzyme 6
1422601_at	Serpinb9	9.57727	10.3097	11.0947	11.4607	11.3881	10.3408	2.06664	Cluster 2	serine (or cysteine) peptidase inhibitor, clade B, member 9
1417166_at	Psip1	8.04906	8.9378	8.10291	8.69442	8.48241	7.43732	2.06349	Cluster 2	PC4 and SFRS1 interacting protein 1
1452740_at	Myh10	6.58126	6.79518	6.83941	7.25155	7.14201	6.09844	2.06132	Cluster 2	myosin, heavy polypeptide 10, non-muscle
1448721_at	D1Ertd622e	9.06282	8.97263	8.59825	9.17505	9.22305	8.18055	2.05979	Cluster 2	DNA segment, Chr 1, ERATO Doi 622, expressed
1417629_at	Prodh	6.90238	6.65751	6.67717	6.51838	7.253	6.21093	2.05918	Cluster 2	proline dehydrogenase
1436594_at	Zfp719	5.56152	5.41434	5.43254	5.45739	5.96721	4.93237	2.04889	Cluster 2	zinc finger protein 719
1449017_at	Nutf2	7.2726	6.8928	7.09793	6.88189	7.45099	6.41735	2.04719	Cluster 2	nuclear transport factor 2
1420994_at	B3gnt5	6.55693	7.01022	8.05596	8.62845	8.33017	7.29705	2.04644	Cluster 2	UDP-GlcNAc:betaGal beta-1,3-N-acetylglucosaminyltransferase 5
1419583_at	Cbx4	9.61505	10.0115	10.0651	9.79509	10.2326	9.20103	2.04425	Cluster 2	chromobox homolog 4 (Drosophila Pc class)
1451122_at	Idi1	10.023	10.2957	11.1583	11.3572	10.4543	9.4227	2.04423	Cluster 2	isopentenyl-diphosphate delta isomerase
1424276_at	Snx16	7.21073	6.95712	7.47695	7.207	7.33717	6.31442	2.03179	Cluster 2	sorting nexin 16
1447075_at	EG669998	6.40334	6.90804	6.95639	7.21921	7.03591	6.01515	2.02899	Cluster 2	hypothetical LOC100503847
1439771_s_at	D13Ertd608e	5.5522	4.7463	7.97085	9.12337	7.27215	6.25419	2.02505	Cluster 2	DNA segment, Chr 13, ERATO Doi 608, expressed
1441748_at		6.50469	6.69771	6.6513	6.68067	6.92623	5.90837	2.02492	Cluster 2	---
1455189_at	Trim33	7.62544	8.00933	7.94588	8.00414	8.58686	7.56901	2.02489	Cluster 2	tripartite motif-containing 33
1454889_x_at	Tmcc3	8.96845	8.29937	8.19899	8.5008	8.99466	7.9812	2.01875	Cluster 2	transmembrane and coiled coil domains 3
1439894_at	A730056I06Rik	5.52766	5.69204	5.86491	5.67818	6.32805	5.31575	2.01712	Cluster 2	RIKEN cDNA A730056I06 gene
1447901_x_at	Sfi1	6.64906	6.93453	6.99437	6.95043	6.94741	5.93974	2.01065	Cluster 2	Sfi1 homolog, spindle assembly associated (yeast)
1438230_at	Pggt1b	8.86471	8.9701	8.95335	9.03439	9.44582	8.43934	2.00901	Cluster 2	protein geranylgeranyltransferase type I, beta subunit
1431476_at	4933407I05Rik	5.11729	5.10534	5.11922	4.87948	5.59527	4.58888	2.00889	Cluster 2	RIKEN cDNA 4933407I05 gene
1427180_at	Slc27a3	7.55281	7.74203	7.90475	8.30877	7.23349	4.92908	4.93963	Cluster 3	solute carrier family 27 (fatty acid transporter), member 3
1416018_at	Dr1	9.65175	9.65045	9.82432	9.97643	7.13698	4.95273	4.54493	Cluster 3	down-regulator of transcription 1
1458802_at	Hivep3	10.6564	10.0367	9.8336	9.8663	7.552	5.47017	4.23344	Cluster 3	human immunodeficiency virus type I enhancer binding protein 3
1460004_x_at	Stx6	11.4825	10.8608	11.242	11.2043	8.45899	6.38826	4.20099	Cluster 3	syntaxin 6
1438386_x_at	Mat2a	11.1555	11.1693	10.8004	11.0713	9.09687	7.06737	4.08263	Cluster 3	methionine adenosyltransferase II, alpha
1437502_x_at	Cd24a	11.5988	12.5283	11.7462	11.9651	8.50148	6.49956	4.00532	Cluster 3	CD24a antigen
1436982_at	Tnrc6b	8.61943	8.83796	8.18853	8.89167	8.2932	6.29476	3.99565	Cluster 3	trinucleotide repeat containing 6b
1426402_at	Syncrip	9.47067	9.64807	9.79369	9.73025	9.54242	7.62533	3.77663	Cluster 3	synaptotagmin binding, cytoplasmic RNA interacting protein
1448334_a_at	Ccni	11.6093	11.6676	11.035	11.4415	8.17021	6.26539	3.74461	Cluster 3	cyclin I
1454874_at	Btbd7	9.38933	9.60086	9.44927	9.30634	8.27019	6.4426	3.54944	Cluster 3	BTB (POZ) domain containing 7
1448733_at	Bmi1	8.96798	7.99919	7.80878	8.40522	7.36584	5.57172	3.46802	Cluster 3	Bmi1 polycomb ring finger oncogene
1436817_at	Exoc5	8.96516	8.97617	8.86225	9.14087	8.48648	6.6985	3.4533	Cluster 3	exocyst complex component 5
1422665_a_at	Pcmt1	8.88449	9.09464	8.44128	8.65972	8.09963	6.3319	3.40516	Cluster 3	protein-L-isoaspartate (D-aspartate) O-methyltransferase 1
1420139_s_at	Krr1	10.1601	10.0842	10.0516	10.0736	8.95768	7.20009	3.38134	Cluster 3	KRR1, small subunit (SSU) processome component, homolog (yeast)
1443867_at	Ankrd12	7.71631	8.14552	7.75705	7.95835	7.75114	5.99592	3.37576	Cluster 3	ankyrin repeat domain 12
1435632_at	Nufip2	8.40045	8.60902	8.5535	8.7894	7.78419	6.04399	3.34081	Cluster 3	nuclear fragile X mental retardation protein interacting protein 2
1452716_at	5730469M10Rik	8.78468	7.81549	7.80464	7.92305	7.52305	5.79111	3.32175	Cluster 3	RIKEN cDNA 5730469M10 gene
1418585_at	Ccnh	6.63767	6.26197	6.24632	6.01318	6.31589	4.58983	3.30823	Cluster 3	cyclin H
1428654_at	1200016B10Rik	8.03992	8.2829	8.56707	8.33601	7.69202	5.97631	3.28459	Cluster 3	RIKEN cDNA 1200016B10 gene
1423795_at	Sfpq	10.0887	10.5784	10.8015	10.6736	9.48376	7.7715	3.27673	Cluster 3	splicing factor proline/glutamine rich (polypyrimidine tract binding protein associated)
1433829_a_at	Hnrnpa2b1	12.2198	12.4437	12.7059	12.7063	10.8729	9.19367	3.20248	Cluster 3	heterogeneous nuclear ribonucleoprotein A2/B1
1423095_s_at	Crbn	9.756	9.51505	9.36733	9.55816	8.34355	6.70835	3.10631	Cluster 3	cereblon
1429596_at	Slc7a6os	7.2512	7.31386	7.49911	7.41787	7.16883	5.53826	3.09636	Cluster 3	solute carrier family 7, member 6 opposite strand
1454984_at	Lifr	9.50251	10.4576	10.1637	10.7341	7.29288	5.68282	3.05266	Cluster 3	leukemia inhibitory factor receptor
1422619_at	Ppap2a	10.3316	11.3521	9.80418	9.97322	9.85267	8.25082	3.03531	Cluster 3	phosphatidic acid phosphatase type 2A
1433543_at	Anln	9.74493	8.76875	8.45492	8.45359	8.34215	6.74962	3.01578	Cluster 3	anillin, actin binding protein
1416430_at	Cat	10.0381	10.0074	10.0159	9.75232	8.08764	6.49734	3.01112	Cluster 3	catalase
1437158_at	Nipbl	10.6834	11.0173	10.6931	11.0648	8.93968	7.35659	2.99611	Cluster 3	Nipped-B homolog (Drosophila)
1460614_at	Mier3	7.57405	8.51109	8.75588	8.40282	7.82992	6.27321	2.94184	Cluster 3	mesoderm induction early response 1, family member 3
1428619_at	2310005N03Rik	9.8292	9.99247	10.2268	9.97623	9.47804	7.92448	2.93541	Cluster 3	family with sequence similarity 36, member A
1448986_x_at		8.16336	9.68154	8.66656	8.70161	7.48856	5.94046	2.92434	Cluster 3	deoxyribonuclease II alpha
1427347_s_at	Tubb2a	10.7288	11.7573	11.842	11.8312	10.5678	9.03223	2.89895	Cluster 3	tubulin, beta 2A
1424598_at	Ddx6	8.40895	8.91904	8.7726	9.08113	7.18801	5.66297	2.87795	Cluster 3	DEAD (Asp-Glu-Ala-Asp) box polypeptide 6
1420091_s_at	Morc3	10.5838	11.089	10.7065	10.8301	8.31385	6.79929	2.85711	Cluster 3	microrchidia 3
1454725_at	Tra2a	10.9143	11.4961	11.1293	11.2641	8.15256	6.64408	2.84509	Cluster 3	transformer 2 alpha homolog (Drosophila)
1427949_at	Rnf160	8.54613	8.66513	8.59133	8.82298	7.99652	6.49149	2.8383	Cluster 3	listerin E3 ubiquitin protein ligase 1
1436921_at	Atp7a	10.5482	10.365	10.0541	10.2722	9.08475	7.58067	2.83645	Cluster 3	ATPase, Cu++ transporting, alpha polypeptide
1416180_a_at	Rdx	8.91102	9.14553	9.48131	9.15792	8.04939	6.54535	2.83636	Cluster 3	radixin
1436330_x_at	EG631624	6.80526	6.973	6.72409	7.13242	6.31847	4.81661	2.83209	Cluster 3	predicted gene 7072
1423445_at	Rock1	8.37331	9.01467	8.75022	8.91072	7.13717	5.63754	2.8277	Cluster 3	Rho-associated coiled-coil containing protein kinase 1
1434312_at	Arf6	8.18751	8.95999	8.99072	9.29855	7.80926	6.32331	2.80102	Cluster 3	ADP-ribosylation factor 6
1417512_at	Evi5	8.68426	6.89273	7.33738	7.94597	6.55078	5.07316	2.78489	Cluster 3	ecotropic viral integration site 5
1434075_at	BC030336	8.57935	8.94265	8.3184	8.90073	7.93365	6.45681	2.78339	Cluster 3	cDNA sequence BC030336
1423804_a_at	Idi1	9.52639	10.074	10.8342	11.0041	6.80725	5.33247	2.7794	Cluster 3	isopentenyl-diphosphate delta isomerase
1451775_s_at	Il13ra1	8.10926	9.14037	7.95519	7.97368	7.55236	6.0884	2.75864	Cluster 3	interleukin 13 receptor, alpha 1
1439833_at	37865	10.052	10.8861	9.79008	9.71413	8.76139	7.31607	2.72322	Cluster 3	septin 3
1437489_x_at	Sdhd	8.1383	7.92681	8.2297	8.12269	7.9314	6.48687	2.72175	Cluster 3	succinate dehydrogenase complex, subunit D, integral membrane protein
1416942_at	Erap1	9.21465	8.67619	9.08192	9.10957	8.18018	6.73975	2.71401	Cluster 3	endoplasmic reticulum aminopeptidase 1
1424672_at	Dmxl1	8.14199	8.35379	8.0287	8.15469	7.44388	6.02879	2.66676	Cluster 3	Dmx-like 1
1429446_at	Sdccag1	10.9079	11.0516	11.1098	11.0762	10.3685	8.95951	2.65546	Cluster 3	serologically defined colon cancer antigen 1
1450069_a_at	Cugbp2	10.7285	11.0847	10.8128	10.8003	9.60553	8.20034	2.64854	Cluster 3	CUGBP, Elav-like family member 2
1452719_at	Zdhhc24	7.01851	6.68767	6.98486	7.06472	7.03092	5.63213	2.63679	Cluster 3	zinc finger, DHHC domain containing 24
1434046_at	AA467197	11.1119	11.1933	12.2569	12.1456	8.70059	7.30798	2.62552	Cluster 3	expressed sequence AA467197
1435225_s_at	Brpf3	6.44229	6.71332	6.66205	6.55582	6.5337	5.14787	2.61321	Cluster 3	bromodomain and PHD finger containing, 3
1445439_at	Epb4,9	6.75378	6.61345	6.67897	6.69387	6.79156	5.40754	2.60994	Cluster 3	erythrocyte protein band 4.9
1434678_at	Mbnl3	9.26182	9.44824	9.16801	9.50157	8.83592	7.46087	2.59376	Cluster 3	muscleblind-like 3 (Drosophila)
1433847_at	Fam40b	7.94519	10.0471	9.00967	9.33491	6.61294	5.23982	2.5903	Cluster 3	family with sequence similarity 40, member B
1419067_a_at	Rabgef1	9.79758	9.65952	9.83251	9.65952	8.54893	7.17801	2.58635	Cluster 3	RAB guanine nucleotide exchange factor (GEF) 1
1428306_at	Ddit4	9.43157	11.2902	10.1413	10.2542	9.82867	8.45804	2.58583	Cluster 3	DNA-damage-inducible transcript 4
1427233_at	Tshz1	8.90241	9.77291	8.81821	8.75436	7.07067	5.70588	2.57539	Cluster 3	teashirt zinc finger family member 1
1428487_s_at	Coq10b	8.33522	8.14111	8.0287	8.29435	7.6436	6.28513	2.56413	Cluster 3	coenzyme Q10 homolog B (S. cerevisiae)
1454663_at	Eif5	9.28009	9.41494	9.64112	9.44537	8.50725	7.15255	2.55743	Cluster 3	eukaryotic translation initiation factor 5
1428410_at	Nat13	7.82372	7.02562	7.27084	7.27028	7.27901	5.92504	2.55615	Cluster 3	N(alpha)-acetyltransferase 50, NatE catalytic subunit
1423564_a_at	Paics	11.7552	11.7999	12.132	11.9889	10.7665	9.41271	2.55585	Cluster 3	phosphoribosylaminoimidazole carboxylase, phosphoribosylaminoribosylaminoimidazole, succinocarboxamide synthetase
1455679_at	Obfc2a	9.22576	7.52122	7.61641	8.51938	8.35969	7.01523	2.53935	Cluster 3	oligonucleotide/oligosaccharide-binding fold containing 2A
1452160_at	Tiparp	9.11372	9.54336	8.67225	8.9576	6.37797	5.03584	2.53525	Cluster 3	TCDD-inducible poly(ADP-ribose) polymerase
1429690_at	1300003B13Rik	7.38602	7.94356	7.25516	7.77839	6.60316	5.26694	2.5249	Cluster 3	RIKEN cDNA 1300003B13 gene
1447947_at	Zfyve16	6.96518	6.812	6.68119	6.68795	5.92026	4.58773	2.51845	Cluster 3	zinc finger, FYVE domain containing 16
1449265_at	Casp1	10.4346	9.79315	10.0337	10.1496	9.3777	8.0481	2.51333	Cluster 3	caspase 1
1435744_at	6720401G13Rik	7.42282	6.90486	6.7683	6.98931	6.71569	5.39213	2.50282	Cluster 3	RIKEN cDNA 6720401G13 gene
1450102_a_at	Amfr /// LOC100046262	10.3211	10.765	10.3634	10.4338	10.1935	8.87335	2.49698	Cluster 3	autocrine motility factor receptor
1433902_at	Kbtbd8	6.89461	6.79084	6.70763	6.9459	6.62319	5.30802	2.48832	Cluster 3	kelch repeat and BTB (POZ) domain containing 8
1428368_at	Arhgap21	8.29047	8.64044	8.67501	8.36034	8.06475	6.75269	2.48296	Cluster 3	Rho GTPase activating protein 21
1434403_at	Spred2	8.10271	8.71771	8.54135	8.59969	8.35669	7.04715	2.47861	Cluster 3	sprouty-related, EVH1 domain containing 2
1423821_at	Tmem168	9.07894	9.1353	9.13777	9.13109	8.22005	6.91054	2.47856	Cluster 3	transmembrane protein 168
1434446_at	Insr	9.38871	8.02507	7.23063	8.04601	8.41536	7.10624	2.47791	Cluster 3	insulin receptor
1437303_at	Il6st	9.69322	9.00885	9.65802	9.39711	9.08937	7.78151	2.47573	Cluster 3	interleukin 6 signal transducer
1436165_at	Luc7l2	8.92721	9.27186	9.09054	9.20156	8.60083	7.29401	2.47395	Cluster 3	LUC7-like 2 (S. cerevisiae)
1436555_at	Slc7a2	12.2492	9.30921	8.88163	9.7322	6.56723	5.26576	2.4648	Cluster 3	solute carrier family 7 (cationic amino acid transporter, y+ system), member 2
1457036_at	LOC639063	7.47382	7.3676	7.22216	7.50726	7.14409	5.84977	2.45261	Cluster 3	---
1450105_at	Adam10	6.95439	6.88544	6.52258	7.14422	6.58123	5.28703	2.45242	Cluster 3	a disintegrin and metallopeptidase domain 10
1424820_a_at	LOC100046168 /// Ndfip1	11.341	11.5204	11.3419	11.4358	9.03923	7.74879	2.44601	Cluster 3	Nedd4 family interacting protein 1
1454666_at	LOC100046855	11.0554	11.296	11.0851	11.3083	9.22171	7.93559	2.4387	Cluster 3	Kruppel-like factor 3 (basic)
1449010_at	Hspa4l	7.40981	7.67189	7.57254	7.1159	7.43371	6.15719	2.42254	Cluster 3	heat shock protein 4 like
1416259_at	Pex12	6.93076	6.68324	6.74299	6.61434	6.60445	5.33303	2.41399	Cluster 3	peroxisomal biogenesis factor 12
1416029_at	Klf10	10.6706	9.7378	8.79387	9.36025	7.19554	5.93172	2.40131	Cluster 3	Kruppel-like factor 10
1456739_x_at	Armcx2	9.47796	10.5541	10.4717	10.493	7.41688	6.15406	2.39964	Cluster 3	armadillo repeat containing, X-linked 2
1425027_s_at	Sft2d2	8.51572	8.51112	9.4637	8.84887	8.4249	7.16935	2.38758	Cluster 3	SFT2 domain containing 2
1440974_at	9030203C11Rik	7.5952	8.00837	7.30343	7.85332	7.48663	6.23127	2.38726	Cluster 3	RIKEN cDNA 9030203C11 gene
1426895_at	Zfp191	8.54139	9.05887	8.76006	9.07916	8.39297	7.14388	2.3769	Cluster 3	zinc finger protein 191
1427897_s_at	Suds3	9.32103	9.24916	9.67909	9.44436	9.41027	8.16268	2.37445	Cluster 3	suppressor of defective silencing 3 homolog (S. cerevisiae)
1435890_at	Atl3	9.66593	9.24635	9.3848	9.59458	7.9634	6.71718	2.37219	Cluster 3	atlastin GTPase 3
1458370_at	Bmp2k	9.02061	9.20417	9.79442	9.59277	8.17061	6.92966	2.36353	Cluster 3	BMP2 inducible kinase
1430955_at	2810403A07Rik	6.33178	6.52622	6.3858	6.54263	6.35266	5.11214	2.36285	Cluster 3	RIKEN cDNA 2810403A07 gene
1419460_at	Rpp14	7.56768	7.03816	7.0363	7.04383	6.72447	5.48439	2.36212	Cluster 3	ribonuclease P 14 subunit (human)
1428796_at	Bbx	7.52716	7.43393	6.47555	7.29188	6.79068	5.5513	2.36098	Cluster 3	bobby sox homolog (Drosophila)
1428773_s_at	Bcor	8.92317	8.8321	9.10414	8.70045	7.45845	6.22292	2.35468	Cluster 3	BCL6 interacting corepressor
1429085_at	Vezf1	9.76197	10.4229	9.83443	10.0303	9.43937	8.20487	2.353	Cluster 3	vascular endothelial zinc finger 1
1423488_at	Mmd	9.64236	8.75993	8.10187	8.56679	7.94657	6.71275	2.35187	Cluster 3	monocyte to macrophage differentiation-associated
1427406_at	Trip11	8.68147	8.29922	8.17582	8.28914	7.02094	5.78736	2.3515	Cluster 3	thyroid hormone receptor interactor 11
1456516_x_at	LOC640502 /// Uap1	8.72686	8.58804	9.02926	9.08962	7.22752	5.99464	2.35036	Cluster 3	UDP-N-acetylhexosamine pyrophosphorylase-like /// UDP-N-acetylglucosamine pyrophosphorylase 1
1435807_at	Cdc42 /// EG664922	8.33292	8.73525	8.6204	9.10675	8.12428	6.893	2.34777	Cluster 3	cell division cycle 42 homolog (S. cerevisiae)
1442858_at	Mycbp2	7.7929	7.61073	7.37394	7.12684	7.64645	6.4167	2.34526	Cluster 3	MYC binding protein 2
1453591_at	5730437N04Rik	7.19329	7.55292	7.57094	7.52779	7.02825	5.79981	2.34312	Cluster 3	RIKEN cDNA 5730437N04 gene
1439531_at	E130311K13Rik	7.72997	7.74789	7.49813	7.8723	7.43177	6.21387	2.32607	Cluster 3	RIKEN cDNA E130311K13 gene
1428162_at	4933421E11Rik	7.79678	7.95139	7.86255	7.86779	6.94122	5.72473	2.3238	Cluster 3	RIKEN cDNA 4933421E11 gene
1424426_at	Mtap	6.99111	6.14372	6.40947	6.80933	6.44087	5.22491	2.32296	Cluster 3	methylthioadenosine phosphorylase
1448434_at	Rnf103	9.35271	9.40739	8.88384	9.1786	7.95766	6.74297	2.3209	Cluster 3	ring finger protein 103
1427356_at	Fam89a	9.12181	7.53641	7.45406	7.65541	7.5074	6.29337	2.31984	Cluster 3	family with sequence similarity 89, member A
1448923_at	Prkra	8.72921	9.16415	9.11253	8.98385	8.31017	7.09967	2.31418	Cluster 3	protein kinase, interferon inducible double stranded RNA dependent activator
1423198_a_at	Smek2	8.04606	8.40762	8.51115	8.20496	7.2516	6.04304	2.31106	Cluster 3	SMEK homolog 2, suppressor of mek1 (Dictyostelium)
1429783_at	Pdlim5	7.63336	8.23853	8.14527	7.95717	7.73824	6.53419	2.30385	Cluster 3	PDZ and LIM domain 5
1438292_x_at	Adk	10.3811	10.4315	9.74018	9.82488	8.32322	7.11999	2.30255	Cluster 3	adenosine kinase
1418070_at	Cdyl	7.56651	7.89774	7.56787	7.44651	5.41574	4.21322	2.30141	Cluster 3	chromodomain protein, Y chromosome-like
1424573_at	Tmed5	10.5412	9.72148	9.89193	9.77594	6.50873	5.31007	2.29526	Cluster 3	transmembrane emp24 protein transport domain containing 5
1428942_at	Mt2	10.2899	10.1335	8.86204	9.18276	9.22887	8.03359	2.28989	Cluster 3	metallothionein 2
1450290_at	Pdcd1lg2	8.25263	7.2881	9.9784	9.43329	7.86714	6.67245	2.28896	Cluster 3	programmed cell death 1 ligand 2
1419144_at	Cd163	6.80029	6.79075	5.80254	9.04105	6.33182	5.13801	2.28757	Cluster 3	CD163 antigen
1437325_x_at	Aldh18a1	9.71219	9.32682	10.0033	9.55321	7.24838	6.05459	2.28754	Cluster 3	aldehyde dehydrogenase 18 family, member A1
1434063_at	Zfp664	8.89868	9.05742	8.98862	8.78039	7.86126	6.67101	2.28191	Cluster 3	zinc finger protein 664
1417410_s_at	Prkci	9.12611	9.49888	8.91205	9.18083	8.92914	7.74213	2.27679	Cluster 3	protein kinase C, iota
1431232_a_at	Mga	7.99409	8.16102	7.67158	8.20628	7.68904	6.50498	2.27214	Cluster 3	MAX gene associated
1428603_at	LOC100036521	9.31249	9.82925	9.6194	9.57976	7.70448	6.52046	2.27209	Cluster 3	glucocorticoid induced transcript 1 /// predicted gene 16039
1456700_x_at	Marcks	11.3024	12.7056	12.4027	12.9286	10.952	9.77262	2.26478	Cluster 3	myristoylated alanine rich protein kinase C substrate
1452213_at	Tex2	8.15008	7.41555	8.6026	8.5734	8.03588	6.85726	2.26359	Cluster 3	testis expressed gene 2
1416318_at	Serpinb1a	12.0368	10.0357	9.67689	10.5006	9.63072	8.45307	2.26209	Cluster 3	serine (or cysteine) peptidase inhibitor, clade B, member 1a
1419585_at	Rp2h	7.93886	8.52104	8.5505	8.17935	8.09501	6.91965	2.2585	Cluster 3	retinitis pigmentosa 2 homolog (human)
1451437_at	Zdhhc20	9.0985	9.12851	9.18016	9.07769	6.92483	5.75052	2.25685	Cluster 3	zinc finger, DHHC domain containing 20
1452757_s_at	Hba-a1 /// Hba-a2	8.81947	11.8329	11.8455	11.8346	9.74715	8.57708	2.25023	Cluster 3	hemoglobin alpha, adult chain 1 /// hemoglobin alpha, adult chain 2
1455638_at	Zfp319	6.68989	6.96519	6.73114	6.63559	6.77844	5.60994	2.24777	Cluster 3	zinc finger protein 319
1434219_at	Stim2	8.00367	8.92843	9.08987	8.76574	8.04914	6.88597	2.23949	Cluster 3	stromal interaction molecule 2
1429520_a_at	Acer3	7.50526	8.70965	8.6489	8.52685	6.89499	5.73529	2.2341	Cluster 3	alkaline ceramidase 3
1438941_x_at	Ampd2	11.1852	10.9231	11.9095	11.3345	8.86947	7.71136	2.23165	Cluster 3	adenosine monophosphate deaminase 2
1444589_at	EG240038	8.12327	7.86954	7.85953	8.12152	7.94421	6.7872	2.22995	Cluster 3	predicted gene 4944
1452157_at	Eprs	10.132	9.72815	9.94543	10.0886	9.44579	8.28971	2.22852	Cluster 3	glutamyl-prolyl-tRNA synthetase
1427164_at	Il13ra1	9.72153	10.6187	9.31048	9.52479	8.52318	7.36808	2.22701	Cluster 3	interleukin 13 receptor, alpha 1
1448391_at	Rab9	10.048	9.60724	10.3136	10.1948	9.73696	8.5821	2.22662	Cluster 3	RAB9, member RAS oncogene family
1416267_at	Scoc	7.86952	7.84484	7.42463	7.68811	6.39485	5.2434	2.22136	Cluster 3	short coiled-coil protein
1427410_at	Dleu2	8.23861	8.52783	8.3016	8.07602	8.11676	6.9711	2.21247	Cluster 3	deleted in lymphocytic leukemia, 2
1416187_s_at	Pnrc2	10.4919	10.9053	10.7077	10.9718	7.44499	6.29935	2.21244	Cluster 3	proline-rich nuclear receptor coactivator 2
1435878_at	Stk38l	7.23519	7.36343	7.40162	7.64015	7.04819	5.90911	2.20241	Cluster 3	serine/threonine kinase 38 like
1449217_at	Casp8ap2	9.26408	9.59997	9.56279	9.55594	8.24887	7.11102	2.20053	Cluster 3	caspase 8 associated protein 2
1442074_at		8.11422	8.7575	9.32509	9.4658	8.58366	7.45008	2.19403	Cluster 3	---
1455323_at	Rbak	8.41942	8.35875	8.14522	8.32659	8.20104	7.06886	2.19189	Cluster 3	RB-associated KRAB repressor
1437353_at	Setd1b	7.67845	7.85174	7.98121	7.62021	7.83069	6.70122	2.18778	Cluster 3	SET domain containing 1B
1435702_s_at	Ywhae	10.1421	9.81781	10.1273	9.96049	7.34323	6.21408	2.18729	Cluster 3	tyrosine 3-monooxygenase/tryptophan 5-monooxygenase activation protein, epsilon polypeptide
1428950_s_at	Nol8	7.74524	7.57917	7.42579	7.39968	7.59766	6.47396	2.17906	Cluster 3	nucleolar protein 8
1459764_x_at	Snx10	7.6632	7.63612	6.43944	7.34104	6.92994	5.80752	2.17711	Cluster 3	Sorting nexin 10
1452438_s_at	LOC100046932 /// Taf4a	7.24987	7.8205	7.78922	7.40508	7.04903	5.92852	2.17423	Cluster 3	TAF4A RNA polymerase II, TATA box binding protein (TBP)-associated factor
1452660_s_at	Klhl7	7.0036	6.99543	7.01551	6.62715	6.35944	5.24402	2.16658	Cluster 3	kelch-like 7 (Drosophila)
1416156_at	Vcl	9.33006	10.361	10.1679	10.3249	9.10311	7.9903	2.16267	Cluster 3	vinculin
1434687_at	C730026J16	7.33854	7.63359	7.16285	7.41791	5.74242	4.63048	2.16137	Cluster 3	hypothetical protein C730026J16 /// zinc finger and BTB domain containing 38
1450386_at	Kpna3	9.07677	8.96455	8.9403	9.3143	9.12174	8.01017	2.16081	Cluster 3	karyopherin (importin) alpha 3
1433980_at	Kat5	7.81996	7.63789	8.09304	7.74331	7.48458	6.37376	2.15969	Cluster 3	K(lysine) acetyltransferase 5
1454724_x_at	Fam108b	9.75644	9.84308	10.3108	10.3277	8.03253	6.92283	2.15801	Cluster 3	family with sequence similarity 108, member B
1423965_at	Cd99l2	7.70943	8.28756	6.8984	7.3419	7.66501	6.55582	2.15726	Cluster 3	CD99 antigen-like 2
1444112_at		6.54478	6.31294	6.04689	6.2317	6.09258	4.98608	2.15322	Cluster 3	predicted gene 15417
1455031_at	Cdc2l6	9.07038	9.25884	8.56857	9.15756	8.86574	7.76165	2.14964	Cluster 3	cyclin-dependent kinase 19
1452201_at	2310047B19Rik	6.11314	6.07174	6.1352	6.20512	6.15937	5.05756	2.14624	Cluster 3	RIKEN cDNA 2310047B19 gene
1443870_at	Abcc4	9.55361	9.81786	9.49281	9.35976	8.2944	7.19451	2.14338	Cluster 3	ATP-binding cassette, sub-family C (CFTR/MRP), member 4
1437421_at		9.69525	10.0483	9.64611	9.83931	8.50422	7.40493	2.14249	Cluster 3	RIKEN cDNA 6330509M05 gene
1426370_at	Far1	9.74022	9.58956	9.81471	9.84393	9.69139	8.59272	2.14158	Cluster 3	fatty acyl CoA reductase 1
1447432_s_at	Zfp263	9.85959	10.3688	10.1461	10.3704	8.91423	7.81951	2.13572	Cluster 3	zinc finger protein 263
1434402_at	Samd8	9.80015	7.92603	7.93576	8.19958	7.79285	6.69863	2.13497	Cluster 3	sterile alpha motif domain containing 8
1429735_at	1110003F05Rik	7.66261	7.43055	6.87283	7.50057	6.8507	5.76045	2.1291	Cluster 3	quaking
1418114_at	Rbpj	7.97551	9.01783	8.74316	8.66959	7.88651	6.79673	2.12842	Cluster 3	recombination signal binding protein for immunoglobulin kappa J region
1455580_at	Usp6nl	9.02732	8.96429	8.95722	8.58208	8.79031	7.70064	2.12825	Cluster 3	USP6 N-terminal like
1447070_at	Eif4h	8.83322	8.97992	8.97935	8.83855	8.02603	6.94049	2.12218	Cluster 3	eukaryotic translation initiation factor 4H
1460303_at	Nr3c1	9.93509	10.2007	9.58417	9.57494	9.37172	8.28663	2.1215	Cluster 3	nuclear receptor subfamily 3, group C, member 1
1448623_at	Tmem123	11.9087	12.5032	12.784	13.127	11.1809	10.0967	2.12018	Cluster 3	transmembrane protein 123
1449453_at	Bst1	10.719	9.13449	8.17673	8.3331	7.46198	6.37937	2.11787	Cluster 3	bone marrow stromal cell antigen 1
1428288_at	Klf9	9.4213	8.90947	9.03299	9.27969	7.7284	6.6483	2.11418	Cluster 3	Kruppel-like factor 9
1454728_s_at	Atp8a1	9.08023	9.52194	8.70994	9.22044	8.4177	7.33804	2.11353	Cluster 3	ATPase, aminophospholipid transporter (APLT), class I, type 8A, member 1
1426709_a_at	Usp33	7.87387	8.08076	7.52516	7.75686	6.43462	5.35712	2.11037	Cluster 3	ubiquitin specific peptidase 33
1437687_x_at	Fkbp9	9.75302	7.2685	7.90283	8.15925	6.88377	5.80687	2.10951	Cluster 3	FK506 binding protein 9
1439464_s_at	Tex10	11.1432	11.297	11.526	11.2251	8.45751	7.38085	2.10914	Cluster 3	testis expressed gene 10
1456604_a_at	Pcmt1	10.7098	10.6743	10.7655	10.473	9.16213	8.08626	2.108	Cluster 3	protein-L-isoaspartate (D-aspartate) O-methyltransferase 1
1450937_at	Lin7c	9.38693	9.55101	9.33665	9.60793	7.05614	5.98341	2.10341	Cluster 3	lin-7 homolog C (C. elegans)
1429110_a_at	Nsun4	6.65596	6.95889	7.53046	7.04867	6.9358	5.86308	2.10339	Cluster 3	NOL1/NOP2/Sun domain family, member 4
1425580_a_at	Pik3c3	8.55263	8.45751	8.38879	8.24699	7.85372	6.78265	2.10099	Cluster 3	phosphoinositide-3-kinase, class 3
1439422_a_at	Fam132a	9.09943	8.87175	9.50183	9.15362	9.10245	8.03376	2.09752	Cluster 3	family with sequence similarity 132, member A
1429503_at	Fam69a	11.8599	11.4126	10.763	10.841	9.708	8.63982	2.09679	Cluster 3	family with sequence similarity 69, member A
1435525_at	Kctd17	6.80204	6.96872	6.96984	7.12035	6.74712	5.67962	2.09579	Cluster 3	potassium channel tetramerisation domain containing 17
1450884_at	Cd36	7.49606	8.08906	6.98412	7.30108	7.09611	6.03105	2.09226	Cluster 3	CD36 antigen
1428594_at	Garnl1	8.52248	8.66557	8.62937	8.7178	8.02719	6.96479	2.0884	Cluster 3	Ral GTPase activating protein, alpha subunit 1
1418912_at	Plxdc2	9.06658	8.65286	8.36372	9.06739	6.5784	5.51623	2.08807	Cluster 3	plexin domain containing 2
1434717_at	Cul3	8.57056	8.49342	8.497	9.02104	8.42951	7.36953	2.08491	Cluster 3	cullin 3
1456244_x_at	Glrx3	10.2945	10.2236	10.3573	10.2627	8.11678	7.05694	2.0847	Cluster 3	glutaredoxin 3
1419976_s_at	Nfatc3	9.473	9.34567	9.76239	9.4404	9.07662	8.01714	2.08418	Cluster 3	nuclear factor of activated T-cells, cytoplasmic, calcineurin-dependent 3
1451652_a_at	Tmem188	9.98769	10.0013	9.83454	9.97008	8.23404	7.17519	2.08328	Cluster 3	transmembrane protein 188
1426711_at	Tmco3	8.29492	8.26164	7.99503	8.05757	8.00182	6.94379	2.08208	Cluster 3	transmembrane and coiled-coil domains 3
1416067_at	Ifrd1	9.79043	9.48707	9.49177	9.56773	8.21744	7.15946	2.08202	Cluster 3	interferon-related developmental regulator 1
1418134_at	Slc25a46	10.3629	10.5599	10.4107	10.4888	10.2258	9.16921	2.08006	Cluster 3	solute carrier family 25, member 46
1431818_at	1700012B15Rik	8.96057	9.58293	9.15273	9.35621	8.6698	7.61612	2.07581	Cluster 3	RIKEN cDNA 1700012B15 gene
1454064_a_at	Rnf138	8.02089	8.54688	8.44601	8.43157	7.23058	6.17884	2.07302	Cluster 3	ring finger protein 138
1419616_at	Bmpr2	7.13443	7.18917	7.17537	6.70826	6.31173	5.26337	2.06818	Cluster 3	bone morphogenic protein receptor, type II (serine/threonine kinase)
1459854_s_at	Dynlt3	11.9376	11.3373	11.0932	11.4746	6.62945	5.58241	2.06629	Cluster 3	dynein light chain Tctex-type 3
1450994_at	Rock1	10.4386	10.7988	10.8125	10.8186	8.93663	7.8926	2.06198	Cluster 3	Rho-associated coiled-coil containing protein kinase 1
1436202_at	Malat1	11.5129	12.1809	11.3187	12.2507	11.0075	9.96747	2.05629	Cluster 3	metastasis associated lung adenocarcinoma transcript 1 (non-coding RNA)
1453332_at	2410002O22Rik /// LOC100044479	6.44983	5.98183	6.32519	6.224	6.29446	5.25552	2.05472	Cluster 3	RIKEN cDNA 2410002O22 gene
1452203_at	Obfc2a	12.1712	11.4171	11.1145	11.5553	10.6451	9.60714	2.05336	Cluster 3	oligonucleotide/oligosaccharide-binding fold containing 2A
1420013_s_at	Lss	8.98871	8.79396	9.60759	9.38339	8.93685	7.89966	2.05223	Cluster 3	lanosterol synthase
1437511_x_at	Clcc1	8.85468	8.50638	8.78194	8.5184	7.51932	6.48418	2.04931	Cluster 3	chloride channel CLIC-like 1
1422836_at	Mbnl3	8.16352	8.40946	8.68376	8.15036	7.89541	6.86081	2.04855	Cluster 3	muscleblind-like 3 (Drosophila)
1436348_at	Gm505	9.32904	9.26532	9.15439	9.25791	9.00477	7.97056	2.04799	Cluster 3	Predicted gene 505
1435430_at	Trappc10	10.5299	10.4138	10.34	10.3867	10.5354	9.50127	2.04794	Cluster 3	trafficking protein particle complex 10
1416469_at	Luzp1	9.67313	9.20638	8.62912	8.98619	8.56326	7.53	2.04664	Cluster 3	leucine zipper protein 1
1439484_at	4930431H11Rik	8.029	8.2323	7.84977	8.15201	7.65961	6.62635	2.04663	Cluster 3	phosphodiesterase 7A
1452008_at	Ttc39b	8.91017	9.6327	8.24475	9.0524	8.44861	7.41707	2.0442	Cluster 3	tetratricopeptide repeat domain 39B
1417130_s_at	Angptl4	10.5039	8.62012	7.4756	8.10807	8.42959	7.39889	2.04302	Cluster 3	angiopoietin-like 4
1416488_at	Ccng2	10.6077	11.0747	10.4852	10.856	9.89159	8.86195	2.04152	Cluster 3	cyclin G2
1428078_at	Rnft1	9.30843	9.31276	9.20264	9.11391	7.22992	6.20042	2.0413	Cluster 3	ring finger protein, transmembrane 1
1434045_at	Cdkn1b	7.2612	7.5295	7.47251	7.56637	5.78075	4.75128	2.04128	Cluster 3	cyclin-dependent kinase inhibitor 1B
1415772_at	Ncl	8.44776	8.30138	8.51389	8.58502	8.12021	7.09326	2.03772	Cluster 3	nucleolin
1441989_at	Bnip2	8.81165	9.14942	8.48048	9.21053	8.85599	7.83044	2.03573	Cluster 3	BCL2/adenovirus E1B interacting protein 2
1446737_a_at	Hook3	8.16577	8.17021	7.87836	8.15307	7.33185	6.309	2.03193	Cluster 3	hook homolog 3 (Drosophila)
1435181_at	Lin54	7.6313	7.46501	7.66814	7.52382	6.2916	5.27029	2.02975	Cluster 3	lin-54 homolog (C. elegans)
1434572_at	Hdac9	7.42481	8.92156	7.3103	7.95558	6.30722	5.29039	2.02347	Cluster 3	histone deacetylase 9
1452783_at	Fndc3b	9.2398	8.57332	8.21063	8.38486	7.58449	6.56768	2.02344	Cluster 3	fibronectin type III domain containing 3B
1421664_a_at	Styx	8.31891	8.66605	8.81537	8.44943	8.13264	7.11841	2.01982	Cluster 3	serine/threonine/tyrosine interaction protein
1443400_at		7.46487	7.67716	7.24775	7.49332	7.30791	6.29498	2.01801	Cluster 3	---
1423224_at	Tctn2	6.20858	7.62134	5.82441	5.96292	5.82516	4.81279	2.01722	Cluster 3	tectonic family member 2
1417124_at	Dstn	12.524	11.4749	11.6555	11.5559	10.3175	9.30705	2.01459	Cluster 3	destrin
1418794_at	Cds2	9.36098	8.36625	8.51647	8.49115	8.09793	7.08963	2.01155	Cluster 3	CDP-diacylglycerol synthase (phosphatidate cytidylyltransferase) 2
1437284_at	Fzd1	9.36591	10.518	9.01779	9.07573	9.40297	8.39554	2.01033	Cluster 3	frizzled homolog 1 (Drosophila)
1449731_s_at	Nfkbia	11.1065	12.2269	11.9277	12.2286	11.5244	10.5197	2.00656	Cluster 3	nuclear factor of kappa light polypeptide gene enhancer in B-cells inhibitor, alpha
1418403_at	Adam19 /// LOC100045780	5.83926	6.73977	6.68691	6.54314	6.14072	5.13603	2.0065	Cluster 3	a disintegrin and metallopeptidase domain 19 (meltrin beta)
1428086_at	Dnm1l	11.1273	11.0547	11.0045	11.2425	9.71277	8.70819	2.00635	Cluster 3	dynamin 1-like
1440192_at	Ttc39b	8.57	9.25342	8.50544	8.69279	8.2129	7.21109	2.00251	Cluster 3	tetratricopeptide repeat domain 39B
1420401_a_at	LOC100046186 /// Ramp3	8.75307	8.65121	9.83868	9.89954	7.85061	6.84902	2.00221	Cluster 3	receptor (calcitonin) activity modifying protein 3
1448409_at	Lrmp	9.08339	9.4844	9.24757	9.3933	8.0808	9.08471	-2.00543	Cluster 4	lymphoid-restricted membrane protein
1442381_at		7.27973	7.28339	6.80701	7.46493	5.73131	6.73558	-2.00593	Cluster 4	---
1441858_at		7.11414	7.10535	6.94338	6.82987	5.36821	6.37805	-2.01369	Cluster 4	---
1438815_at	Hist2h2aa1 /// Hist2h2aa2	6.39846	6.55245	6.18172	6.62668	5.42524	6.43717	-2.01661	Cluster 4	histone cluster 2, H2aa1 /// histone cluster 2, H2aa2
1457636_x_at		7.87242	7.60592	7.97634	7.63353	6.85374	7.86933	-2.02173	Cluster 4	---
1457198_at	Nrp1	8.15292	8.36175	7.26047	7.79325	6.80458	7.82395	-2.02704	Cluster 4	neuropilin 1
1456597_at	Heatr3	7.20515	7.01367	7.44481	6.98276	5.4175	6.44163	-2.03373	Cluster 4	HEAT repeat containing 3
1448667_x_at	Tob2	8.10168	8.66258	8.41021	8.31413	6.36984	7.39505	-2.03525	Cluster 4	transducer of ERBB2, 2
1452030_a_at	Hnrnpr	8.3855	8.38801	8.39478	7.72079	6.9845	8.01544	-2.04335	Cluster 4	heterogeneous nuclear ribonucleoprotein R
1450628_at	Slc2a8	8.64598	8.51831	8.28546	8.40043	7.17491	8.2096	-2.04868	Cluster 4	solute carrier family 2, (facilitated glucose transporter), member 8
1459961_a_at	Stat3	7.64966	8.12998	7.60003	8.09243	6.2088	7.24434	-2.04988	Cluster 4	Signal transducer and activator of transcription 3
1424466_at	Ipo9	8.1693	8.00638	7.96381	7.92298	7.20305	8.24333	-2.05662	Cluster 4	importin 9
1430165_at	Stk17b	8.96222	9.94198	9.35689	9.80337	7.73505	8.77593	-2.05749	Cluster 4	serine/threonine kinase 17b (apoptosis-inducing)
1436804_s_at	Scyl1	9.65366	9.13121	9.45086	9.15153	7.54358	8.58788	-2.06237	Cluster 4	SCY1-like 1 (S. cerevisiae)
1439343_at		7.25993	8.06161	6.64552	7.30968	6.13442	7.18009	-2.06433	Cluster 4	---
1420098_s_at	D13Ertd787e	7.28654	8.20956	7.22615	8.25987	6.45038	7.50374	-2.07535	Cluster 4	DNA segment, Chr 13, ERATO Doi 787, expressed
1415804_at	Cx3cl1	6.66338	6.86385	6.70852	6.95508	5.81301	6.86711	-2.07642	Cluster 4	chemokine (C-X3-C motif) ligand 1
1447898_s_at	Sfrs6	11.2723	11.7568	11.2808	11.7743	8.81635	9.87115	-2.07742	Cluster 4	serine/arginine-rich splicing factor 6
1436614_at		8.85495	7.4163	8.39481	8.48935	5.63675	6.69216	-2.07831	Cluster 4	---
1435229_at	Gramd1b	6.92559	7.19033	7.33338	6.99754	6.23418	7.28988	-2.07873	Cluster 4	GRAM domain containing 1B
1422708_at	Pik3cg	8.91569	9.40574	8.51821	8.52487	7.51534	8.58184	-2.09435	Cluster 4	phosphoinositide-3-kinase, catalytic, gamma polypeptide
1443779_s_at	Lcor	9.68835	9.51181	8.84463	9.62667	7.6707	8.75089	-2.11431	Cluster 4	ligand dependent nuclear receptor corepressor
1438610_a_at	Cryz	9.89448	10.3718	9.48344	9.52079	6.54533	7.63132	-2.12283	Cluster 4	crystallin, zeta
1429430_at	Pcmtd1	6.57749	6.74213	5.96743	6.64649	5.33912	6.42731	-2.12606	Cluster 4	protein-L-isoaspartate (D-aspartate) O-methyltransferase domain containing 1
1424287_at	Prkx	6.55488	7.06666	7.13939	7.41897	5.06733	6.15563	-2.12623	Cluster 4	protein kinase, X-linked
1454879_s_at	1700052N19Rik	7.6695	7.44751	7.69215	7.64158	5.85751	6.96186	-2.15002	Cluster 4	RIKEN cDNA 1700052N19 gene
1450652_at	Ctsk	12.1272	10.8443	9.55938	9.80963	8.26544	9.37117	-2.15207	Cluster 4	cathepsin K
1459728_at	Isy1	6.52537	6.49098	6.29467	6.6109	5.0531	6.15931	-2.15279	Cluster 4	ISY1 splicing factor homolog (S. cerevisiae)
1417026_at	Pfdn1	8.38719	7.81268	8.70042	8.09924	7.16492	8.27524	-2.15894	Cluster 4	prefoldin 1
1441918_x_at	OTTMUSG00000000720	8.22955	7.82935	8.061	8.14185	6.8456	7.95602	-2.15908	Cluster 4	serine (or cysteine) peptidase inhibitor, clade B, member 6e
1426951_at	Crim1	7.79923	9.20032	7.16411	7.78122	5.56889	6.67954	-2.15943	Cluster 4	cysteine rich transmembrane BMP regulator 1 (chordin like)
1449578_at	Supt16h	6.30985	6.20346	6.70258	6.61362	5.12178	6.23307	-2.16039	Cluster 4	suppressor of Ty 16 homolog (S. cerevisiae)
1457670_s_at	Lmna	9.9844	9.44857	8.82804	9.06897	5.38849	6.50043	-2.16136	Cluster 4	lamin A
1453491_at	Pyroxd2	6.50281	6.21375	6.80203	6.2844	5.43999	6.55772	-2.17004	Cluster 4	pyridine nucleotide-disulphide oxidoreductase domain 2
1456980_at	Rab44	10.5039	7.69075	7.01784	7.54693	5.7129	6.83435	-2.17565	Cluster 4	RAB44, member RAS oncogene family
1421236_at	Ripk2	6.72927	6.71552	6.71466	6.5143	5.61458	6.73967	-2.18115	Cluster 4	receptor (TNFRSF)-interacting serine-threonine kinase 2
1437859_x_at	Eif5a	10.5079	9.98204	10.2491	10.3387	8.3736	9.50125	-2.18502	Cluster 4	eukaryotic translation initiation factor 5A
1432006_at	Ap2a2	7.58496	7.86391	7.1632	7.66686	6.60289	7.73918	-2.19815	Cluster 4	adaptor protein complex AP-2, alpha 2 subunit
AFFX-18SRNAMur/X00686_5_at		13.4152	13.5762	13.3793	12.9541	9.10002	10.2528	-2.22338	Cluster 4	---
1439075_at	Polr3f	6.55762	6.14796	6.37792	6.34091	4.78645	5.94805	-2.23705	Cluster 4	polymerase (RNA) III (DNA directed) polypeptide F
1454671_at	Insig1	7.82268	7.90052	7.95941	8.34357	5.45652	6.63008	-2.25568	Cluster 4	insulin induced gene 1
1449254_at	Spp1	11.2333	9.86452	11.0562	9.86239	7.53545	8.70921	-2.256	Cluster 4	secreted phosphoprotein 1
1444952_a_at	Nucks1	10.6394	10.9281	11.0529	10.9977	8.65309	9.83794	-2.2734	Cluster 4	nuclear casein kinase and cyclin-dependent kinase substrate 1
1434976_x_at	Eif4ebp1	10.3508	10.0783	9.90364	9.90147	8.0649	9.26656	-2.30005	Cluster 4	eukaryotic translation initiation factor 4E binding protein 1
1438660_at	Gcnt2	9.81004	8.31491	8.45552	8.21885	7.32561	8.53285	-2.30896	Cluster 4	glucosaminyl (N-acetyl) transferase 2, I-branching enzyme
1434891_at	Ptgfrn	9.34615	7.622	6.60478	7.16411	5.31427	6.54009	-2.33889	Cluster 4	prostaglandin F2 receptor negative regulator
1418639_at	Sftpc	8.33015	8.60055	7.32404	8.48115	5.24344	6.47551	-2.34904	Cluster 4	surfactant associated protein C
1438557_x_at	Dnpep	10.8283	10.8076	10.9756	10.8818	7.7884	9.02696	-2.35963	Cluster 4	aspartyl aminopeptidase
1451971_at	Cul4a	8.56013	8.45272	8.51188	8.652	6.30362	7.54401	-2.36263	Cluster 4	cullin 4A
1450008_a_at	Ctnnb1	9.66784	8.70985	8.08735	8.41404	7.02182	8.2623	-2.36277	Cluster 4	catenin (cadherin associated protein), beta 1
1449014_at	Lactb	11.3119	11.4658	11.7733	11.5824	9.54998	10.7972	-2.37383	Cluster 4	lactamase, beta
1447339_at		7.64947	8.68403	8.28432	9.00725	6.29498	7.55688	-2.39812	Cluster 4	---
1450407_a_at	Anp32a	6.81885	6.15055	6.87926	6.50166	5.42956	6.69586	-2.40543	Cluster 4	acidic (leucine-rich) nuclear phosphoprotein 32 family, member A
1423246_at	Erp44	8.3793	8.26938	8.39623	8.26679	6.60615	7.89843	-2.44915	Cluster 4	endoplasmic reticulum protein 44
1431726_a_at	Tmem80	6.9903	6.65953	6.78322	6.6614	5.51787	6.82149	-2.46847	Cluster 4	transmembrane protein 80
1424588_at	Srgap3	8.56533	9.79694	8.9481	8.93075	7.91665	9.22174	-2.47099	Cluster 4	SLIT-ROBO Rho GTPase activating protein 3
1424607_a_at	100039204 /// 100040620 /// 100040790 /// 100041416 /// 100042151 /// 100043211 /// 100043316 /// Cwc22 /// LOC100047648 /// OTTMUSG00000017752	11.3256	11.7515	11.2601	11.6651	8.47998	9.786	-2.47259	Cluster 4	predicted gene 4354
1426259_at	Pank3	8.59408	8.23451	8.42794	7.79711	5.54897	6.85969	-2.48066	Cluster 4	pantothenate kinase 3
1449176_a_at	Dck	8.28842	8.32351	8.60055	8.25481	4.91184	6.26633	-2.55706	Cluster 4	deoxycytidine kinase
1447895_x_at	Pan3	7.4759	8.13205	7.94117	8.31079	5.22997	6.59405	-2.57411	Cluster 4	PAN3 polyA specific ribonuclease subunit homolog (S. cerevisiae)
1436281_at	B230307C23Rik	6.13904	6.05563	5.8932	5.98301	4.43761	5.80622	-2.58222	Cluster 4	RIKEN cDNA B230307C23 gene
1421792_s_at	Trem2	7.84449	6.92272	7.30462	7.43294	6.15911	7.53524	-2.5957	Cluster 4	triggering receptor expressed on myeloid cells 2
1421217_a_at	Lgals9	7.94314	7.05022	7.46748	7.69509	6.41569	7.82661	-2.65907	Cluster 4	lectin, galactose binding, soluble 9
1436590_at	Ppp1r3b	8.83791	6.67289	7.4832	7.27454	5.36727	6.80047	-2.70046	Cluster 4	protein phosphatase 1, regulatory (inhibitor) subunit 3B
1438377_x_at	Slc13a3	6.93727	6.72409	7.37153	7.38064	5.39547	6.87398	-2.78662	Cluster 4	solute carrier family 13 (sodium-dependent dicarboxylate transporter), member 3
1422648_at	Slc7a2	10.266	6.91003	6.62144	7.525	4.73203	6.24923	-2.86235	Cluster 4	solute carrier family 7 (cationic amino acid transporter, y+ system), member 2
1450199_a_at	Stab1	7.4516	7.90917	8.70417	9.43979	6.75928	8.32789	-2.96618	Cluster 4	stabilin 1
1437357_at	Ythdc2	7.62223	7.34478	7.41265	7.44784	5.44687	7.02647	-2.98886	Cluster 4	YTH domain containing 2
1422469_at	Tbk1	9.68651	9.73719	9.7763	9.69099	7.70753	9.29567	-3.00661	Cluster 4	TANK-binding kinase 1
1434746_at	Mga	7.74861	8.04236	7.80046	8.16366	6.35913	7.94758	-3.00727	Cluster 4	MAX gene associated
1455505_at	Gatad2a	7.43527	7.30771	7.28061	7.39358	5.14032	6.72927	-3.00831	Cluster 4	GATA zinc finger domain containing 2A
1453030_at	Msl2	8.59213	8.76215	9.09618	8.78929	6.31778	8.15512	-3.57352	Cluster 4	male-specific lethal 2 homolog (Drosophila)
1443822_s_at	Cisd1	8.74887	7.55252	7.73283	7.35895	5.6196	7.56117	-3.84122	Cluster 4	CDGSH iron sulfur domain 1
1459191_at	B130020M22Rik	5.12774	5.04099	5.20394	5.2093	5.23207	6.23312	-2.00145	Cluster 5	RIKEN cDNA B130020M22 gene
1417656_at	Mybl2	5.91735	5.77855	6.14644	6.06933	6.03698	7.03807	-2.00151	Cluster 5	myeloblastosis oncogene-like 2
1459622_at	Gm22	5.96827	5.96923	6.06958	6.13244	6.42965	7.43463	-2.00692	Cluster 5	predicted gene 22
1453123_at	Sf3b2	4.89401	4.91866	5.14176	5.12331	5.03056	6.03634	-2.00803	Cluster 5	splicing factor 3b, subunit 2
1425244_a_at	Theg	5.16256	5.21241	5.32059	5.33247	5.19747	6.20529	-2.01086	Cluster 5	testicular haploid expressed gene
1445493_at	AU022255	6.54781	6.59129	6.57783	6.47656	6.8677	7.87716	-2.01315	Cluster 5	expressed sequence AU022255
1450625_at	Col5a2	4.84145	4.90266	4.95253	4.76373	5.25524	6.26557	-2.01437	Cluster 5	collagen, type V, alpha 2
1425256_a_at	Dixdc1	5.09541	5.0824	5.02769	5.04811	5.19689	6.21194	-2.02098	Cluster 5	DIX domain containing 1
1431347_at	5730407M17Rik	5.06039	5.45382	5.43837	5.44772	5.7828	6.7983	-2.02161	Cluster 5	RIKEN cDNA 5730407M17 gene
1428540_at	Fam115a	6.4677	5.95525	5.55246	5.68793	6.35049	7.3677	-2.02401	Cluster 5	family with sequence similarity 115, member A
1438616_x_at	Svs5	5.1233	4.9855	5.25548	5.15623	5.18198	6.19943	-2.02435	Cluster 5	seminal vesicle secretory protein 5
1417502_at	Tspan7	5.62321	5.84405	5.6905	5.73144	5.79842	6.81716	-2.02615	Cluster 5	tetraspanin 7
1418350_at	Hbegf	5.49436	5.38496	6.55665	6.15074	5.82254	6.84297	-2.02852	Cluster 5	heparin-binding EGF-like growth factor
1425144_at	Klk1b11	6.86858	5.83932	6.57137	6.11885	6.68537	7.70857	-2.03243	Cluster 5	kallikrein 1-related peptidase b11
1423027_at	Foxl1	5.28785	5.22484	5.33965	5.38989	5.73203	6.75637	-2.03403	Cluster 5	forkhead box L1
1444616_x_at		6.14644	6.0777	6.37977	5.88148	7.83956	8.86471	-2.03517	Cluster 5	---
1454063_at	4933412E24Rik	5.21055	5.17922	5.13133	5.16548	5.06541	6.09144	-2.03642	Cluster 5	RIKEN cDNA 4933412E24 gene
1453262_at	2810032G03Rik	5.08463	5.39865	5.31418	5.13013	5.28986	6.32413	-2.04808	Cluster 5	RIKEN cDNA 2810032G03 gene
1418569_at	Fblim1	6.19754	5.17866	5.55299	5.4715	5.66611	6.70711	-2.05765	Cluster 5	filamin binding LIM protein 1
1423231_at	Nrgn	4.89146	4.70813	4.79823	4.9462	5.27131	6.31296	-2.05859	Cluster 5	neurogranin
1443317_at	D6Ertd47e	5.03767	5.06599	5.13813	4.93953	5.75289	6.79855	-2.06431	Cluster 5	DNA segment, Chr 6, ERATO Doi 47, expressed
1459858_x_at	Crtac1	4.9578	4.78539	4.87165	4.95388	5.14231	6.18858	-2.06519	Cluster 5	cartilage acidic protein 1
1422738_at	Ddr2	6.60585	6.42088	6.7303	6.72955	6.90937	7.95596	-2.06564	Cluster 5	discoidin domain receptor family, member 2
1425003_at	Uroc1	8.58819	8.63678	8.74025	8.58799	10.1076	11.1544	-2.06592	Cluster 5	urocanase domain containing 1
1419798_at	2610019E17Rik	4.74168	4.97355	4.71294	4.93192	4.83618	5.88487	-2.06865	Cluster 5	RIKEN cDNA 2610019E17 gene
1449206_at	Sypl2	5.97276	6.0227	5.64528	5.91813	6.32831	7.37861	-2.07095	Cluster 5	synaptophysin-like 2
1428742_at	Fbxo45	6.25034	6.75353	6.50139	6.58175	6.67132	7.72442	-2.07498	Cluster 5	F-box protein 45
1441225_at		5.5592	5.62888	5.64141	5.66971	6.01414	7.06962	-2.07841	Cluster 5	---
1457022_at		5.34083	5.42117	5.54262	5.33284	6.50405	7.56065	-2.08001	Cluster 5	---
1431977_at	4933402J15Rik	4.95729	5.01321	4.9854	4.96389	4.94222	6.0028	-2.08577	Cluster 5	RIKEN cDNA 4933402J15 gene
1419289_a_at	Syngr1	5.37673	5.44829	5.9672	5.73897	6.04893	7.1116	-2.08879	Cluster 5	synaptogyrin 1
1427695_a_at	Pou2f1	6.91611	6.91281	6.73425	6.8107	6.73304	7.79609	-2.08934	Cluster 5	POU domain, class 2, transcription factor 1
1426363_x_at	H2afy2	5.15965	5.21162	5.24771	5.18842	5.96969	7.03422	-2.09147	Cluster 5	H2A histone family, member Y2
1449882_a_at	Casr	5.44072	5.06658	5.39812	5.25306	5.67748	6.74391	-2.09425	Cluster 5	calcium-sensing receptor
1446467_at	Atp9b	5.04063	5.34129	5.38221	5.25883	5.18516	6.25167	-2.09436	Cluster 5	ATPase, class II, type 9B
1421790_a_at	Kcnab3	5.36071	5.15788	5.61244	5.37782	6.02851	7.09672	-2.09683	Cluster 5	potassium voltage-gated channel, shaker-related subfamily, beta member 3
1443188_at	Ube2w	5.61793	5.8443	5.60458	6.12305	5.94491	7.01466	-2.09907	Cluster 5	ubiquitin-conjugating enzyme E2W (putative)
1421464_at	Nkx3-2	4.97952	5.06305	5.09204	5.13537	5.13995	6.21007	-2.0996	Cluster 5	NK3 homeobox 2
1451038_at	Apln	6.50755	6.71397	6.60327	6.56542	6.82989	7.90124	-2.10139	Cluster 5	apelin
1456313_x_at	Mrpl28	9.334	9.35463	9.48285	9.40547	9.64526	10.7169	-2.1018	Cluster 5	mitochondrial ribosomal protein L28
1445005_at	C79491	6.07805	6.00151	6.10236	6.08317	6.19604	7.26769	-2.10183	Cluster 5	expressed sequence C79491
1436415_at		5.53833	5.51757	5.49873	5.63883	5.64584	6.71793	-2.10248	Cluster 5	mediator complex subunit 29
1428665_at	Pfn4	4.64678	4.95817	4.87007	4.73365	4.7066	5.77924	-2.10327	Cluster 5	profilin family, member 4
1420263_at		5.72117	5.76643	6.00451	5.76358	5.90552	6.97895	-2.10443	Cluster 5	---
1438745_at	ENSMUSG00000074178	5.27229	5.08985	5.29757	5.15969	6.28525	7.35928	-2.1053	Cluster 5	predicted gene 10638
1451295_a_at	Chd4	9.32662	9.39883	9.21889	9.34809	9.20049	10.2751	-2.10619	Cluster 5	chromodomain helicase DNA binding protein 4
1455536_at	A630023A22Rik	5.714	5.88203	5.75537	5.64315	6.00485	7.08055	-2.10776	Cluster 5	RIKEN cDNA A630023A22 gene
1439763_at	Dnajc11	5.08176	4.71552	5.26383	4.89879	5.47889	6.5556	-2.10922	Cluster 5	DnaJ (Hsp40) homolog, subfamily C, member 11
1442747_at		5.09354	5.33145	5.36862	5.30384	5.55997	6.63898	-2.11259	Cluster 5	---
1458653_at		7.51116	6.88553	7.36336	7.40505	7.37111	8.45324	-2.11716	Cluster 5	---
1446038_at	Ccr9	5.19053	5.20073	5.14494	5.08574	5.41343	6.49835	-2.12125	Cluster 5	Chemokine (C-C motif) receptor 9
1419335_at		4.93195	4.92983	5.13086	5.08853	4.92052	6.01088	-2.12927	Cluster 5	RIKEN cDNA 4930441O14 gene
1458328_x_at		5.23431	5.22118	5.13915	5.19472	5.93148	7.02437	-2.13301	Cluster 5	---
1423513_at	Uhrf1bp1l	6.45042	6.59445	6.49548	6.75779	6.69817	7.79953	-2.14556	Cluster 5	UHRF1 (ICBP90) binding protein 1-like
1423179_at	Kcnb1	5.22713	5.16441	5.39687	5.25595	5.37996	6.48286	-2.14786	Cluster 5	potassium voltage gated channel, Shab-related subfamily, member 1
1431455_at	Tmem30c	5.30194	5.47794	5.76249	5.58476	5.76005	6.86411	-2.14959	Cluster 5	transmembrane protein 30C
1427530_at	Bicd1	4.72279	4.94716	4.88689	4.72112	4.96276	6.06839	-2.15192	Cluster 5	bicaudal D homolog 1 (Drosophila)
1428820_at	Mapre1	6.82405	6.82032	6.8677	6.91965	6.92166	8.02803	-2.15304	Cluster 5	microtubule-associated protein, RP/EB family, member 1
1456914_at	Slc16a4	4.71554	4.78707	4.86694	4.86887	4.75729	5.86585	-2.15631	Cluster 5	Solute carrier family 16 (monocarboxylic acid transporters), member 4
1440029_at	St8sia3	4.92898	4.81853	4.8752	5.01026	5.18361	6.29721	-2.16384	Cluster 5	ST8 alpha-N-acetyl-neuraminide alpha-2,8-sialyltransferase 3
1422036_at	Strn	5.31152	5.31419	5.25621	5.25802	5.55532	6.67598	-2.17446	Cluster 5	striatin, calmodulin binding protein
1419750_at	Trdmt1	6.03561	5.92989	5.62048	5.89489	6.06174	7.19331	-2.19097	Cluster 5	tRNA aspartic acid methyltransferase 1
1430036_at	2310015B20Rik	5.84709	5.62633	5.58178	5.87627	5.78249	6.91479	-2.19208	Cluster 5	RIKEN cDNA 2310015B20 gene
1458044_at	Cml1	5.06909	4.91615	4.90032	4.87687	5.17931	6.31716	-2.20054	Cluster 5	camello-like 1
1440328_at	Nasp	6.06897	6.27709	6.40358	6.17107	6.27913	7.41726	-2.20095	Cluster 5	nuclear autoantigenic sperm protein (histone-binding)
1421093_at	Slc7a10	5.25931	5.53475	5.676	5.52406	5.89116	7.03093	-2.20346	Cluster 5	solute carrier family 7 (cationic amino acid transporter, y+ system), member 10
1417838_at	LOC100039614 /// LOC100039753 /// LOC100039810 /// LOC100039926 /// LOC100040017 /// LOC100040031 /// LOC100040489 /// LOC100040673 /// LOC100040744 /// LOC100040786 /// LOC100040873 /// LOC100040911 /// LOC100040943 /// LOC100041207 /// LOC100041223 /// LOC100041256 /// LOC100041776 /// LOC100041980 /// LOC100042044 /// LOC100042231 /// LOC100042401 /// LOC100042428 /// LOC100042689 /// LOC38213…	5.48956	5.45454	5.7873	5.83717	5.89169	7.03807	-2.21358	Cluster 5	hypothetical protein LOC100039614 /// spermiogenesis specific transcript on the Y family member /// hypothetical protein LOC100039810 /// y-linked testis-specific protein 1-like /// y-linked testis-specific protein 1-like /// hypothetical protein LOC100040031 /// y-linked testis-specific protein 1-like /// y-linked testis-specific protein 1-like /// spermiogenesis specific transcript on the Y 2-l…
1426104_at	Mapk14	5.41671	5.32386	5.55176	5.51073	5.84167	6.98844	-2.21417	Cluster 5	mitogen-activated protein kinase 14
1459578_at	AA407175	5.16767	5.28238	5.04655	5.07672	6.00035	7.15974	-2.23363	Cluster 5	expressed sequence AA407175
1444505_at	Zmiz1	5.31014	5.70092	5.84712	5.80006	5.84521	7.00672	-2.23691	Cluster 5	zinc finger, MIZ-type containing 1
1459227_at		4.9624	4.92972	5.1304	4.71412	5.2275	6.39312	-2.2433	Cluster 5	---
1453421_at	Srr	5.41523	5.57463	5.24352	5.359	5.89685	7.06907	-2.25357	Cluster 5	serine racemase
1457444_at		4.94118	4.687	4.82036	4.8105	4.7447	5.92482	-2.26596	Cluster 5	---
1451826_at	Cabp5	5.11475	5.18372	5.30258	5.12858	5.4591	6.64221	-2.27065	Cluster 5	calcium binding protein 5
1421361_at	Grk1 /// LOC100045507	6.13176	6.29656	6.4176	6.22179	6.42028	7.60858	-2.27884	Cluster 5	G protein-coupled receptor kinase 1
1426156_at	Lats2	5.05014	5.1737	5.34248	5.13884	5.30598	6.49651	-2.28236	Cluster 5	large tumor suppressor 2
1432730_at	5830415G21Rik	4.87099	5.07304	5.04211	4.83686	5.28833	6.47909	-2.28273	Cluster 5	RIKEN cDNA 5830415G21 gene
1432019_at	Trub1	5.24678	5.16	5.21149	5.13074	5.09819	6.29375	-2.29033	Cluster 5	TruB pseudouridine (psi) synthase homolog 1 (E. coli)
1458288_at		5.8542	5.8431	6.25342	6.09766	6.16054	7.35806	-2.29345	Cluster 5	---
1419836_at		5.89947	5.93872	6.17284	5.9779	7.07507	8.27619	-2.29917	Cluster 5	---
1447628_x_at	Mrps5	5.09947	4.99984	5.06448	5.07275	5.36275	6.569	-2.30736	Cluster 5	mitochondrial ribosomal protein S5
1419269_at	Dut	4.94497	5.07786	4.98136	4.67755	5.2574	6.46375	-2.30754	Cluster 5	deoxyuridine triphosphatase
1441166_at	A330050F15Rik	5.81445	5.89762	6.04021	5.9853	5.91998	7.13346	-2.31896	Cluster 5	RIKEN cDNA A330050F15 gene
1421611_at	AB041806	5.88021	6.04484	6.03445	6.13779	6.19841	7.41263	-2.32014	Cluster 5	hypothetical protein, MNCb-2457
1422435_at	2210010C04Rik	4.8466	4.9963	4.9514	4.85518	4.99703	6.21761	-2.3304	Cluster 5	RIKEN cDNA 2210010C04 gene
1447663_at		4.73232	4.6477	4.68011	4.84749	4.95427	6.17872	-2.33666	Cluster 5	---
1442645_at	Atp2b3	6.28653	6.11317	6.0738	5.85058	6.21299	7.4455	-2.34975	Cluster 5	ATPase, Ca++ transporting, plasma membrane 3
1423274_at	Ints6	5.27355	5.23045	5.37413	5.03844	5.91769	7.15222	-2.35305	Cluster 5	integrator complex subunit 6
1442598_at	Prkrip1	5.51982	5.09184	5.53388	5.32224	5.80607	7.04183	-2.35506	Cluster 5	Prkr interacting protein 1 (IL11 inducible)
1426056_at	Pigq	5.47683	5.37218	5.52372	5.21077	5.3133	6.55037	-2.35719	Cluster 5	phosphatidylinositol glycan anchor biosynthesis, class Q
1435848_at	D430041D05Rik	5.3186	5.35519	5.27743	5.35965	5.51563	6.75279	-2.35734	Cluster 5	RIKEN cDNA D430041D05 gene
1431494_at	A930008B05Rik	5.0203	5.45311	5.11723	5.02615	5.08867	6.33101	-2.36582	Cluster 5	RIKEN cDNA A930008B05 gene
1434943_at	Morn4	6.00187	5.97364	5.81015	5.763	5.85062	7.09317	-2.36616	Cluster 5	MORN repeat containing 4
1459436_at		5.01288	4.84625	5.03753	5.00922	4.89145	6.1439	-2.38245	Cluster 5	---
1441508_at	ENSMUSG00000062298	5.15202	5.09027	5.09042	5.02249	5.38856	6.65336	-2.40294	Cluster 5	predicted gene 10114
1443752_at		7.87139	8.04207	7.91662	7.93384	8.53249	9.81014	-2.42443	Cluster 5	RIKEN cDNA E230008N13 gene
1441080_at		5.36648	5.59328	5.65202	5.54585	5.61488	6.89286	-2.42498	Cluster 5	---
1430032_at	Rbm4b	4.92374	5.18406	5.14482	5.21215	5.20465	6.48661	-2.43169	Cluster 5	RNA binding motif protein 4B
1418069_at	Apoc2	6.33951	6.25295	7.3046	6.96254	6.59204	7.87505	-2.43346	Cluster 5	apolipoprotein C-II
1437393_at	Prkca	8.13693	7.49377	7.32903	7.79353	7.66497	8.96295	-2.45885	Cluster 5	protein kinase C, alpha
1446891_at	Fam117b	4.709	4.86401	4.54004	4.77214	4.83355	6.13165	-2.45905	Cluster 5	Family with sequence similarity 117, member B
1429147_at	Gas2	5.0639	5.15567	5.52049	5.25115	5.97007	7.28836	-2.49371	Cluster 5	growth arrest specific 2
1445651_at		6.91576	7.14704	7.06482	7.09868	7.13712	8.48132	-2.53889	Cluster 5	---
1443074_at		5.6668	5.93702	5.78557	5.61833	5.87083	7.21762	-2.54346	Cluster 5	---
1438907_at		5.40856	5.24854	5.46905	5.50572	5.60912	6.96039	-2.55137	Cluster 5	---
1450547_x_at	Dub2 /// Dub2a	5.39788	5.55885	5.50448	5.10952	5.33678	6.69262	-2.55946	Cluster 5	deubiquitinating enzyme 2a /// ubiquitin specific peptidase, pseudogene (USP17 homolog) /// ubiquitin specific peptidase 17-like 5
1430398_at	4921517O11Rik	5.61209	5.65513	5.69372	5.46135	5.64418	7.00236	-2.56361	Cluster 5	RIKEN cDNA 4921517O11 gene
1421520_at	Jph1	6.06764	6.04218	5.99576	5.93402	6.25201	7.61139	-2.56575	Cluster 5	junctophilin 1
1426720_at	Apbb2	5.36405	5.29108	5.52717	5.497	6.07103	7.43237	-2.56923	Cluster 5	amyloid beta (A4) precursor protein-binding, family B, member 2
1426526_s_at	Ovgp1	5.30816	4.90305	5.39182	5.13887	5.6259	6.99576	-2.58445	Cluster 5	oviductal glycoprotein 1
1456242_at	EG653016	5.19625	5.30675	5.33692	5.25931	5.40509	6.77552	-2.58549	Cluster 5	predicted gene 7325
1448680_at	LOC100046946 /// Serpina1c	5.27505	5.22618	5.42462	5.19856	8.27408	9.6477	-2.5912	Cluster 5	serine (or cysteine) peptidase inhibitor, clade A, member 1C
1440067_at		4.77743	4.83317	4.92385	4.83923	4.94558	6.32239	-2.59694	Cluster 5	---
1435381_at	2610110G12Rik	5.18215	5.64279	5.4738	5.68953	5.67825	7.05942	-2.60479	Cluster 5	alpha tubulin acetyltransferase 1
1432273_a_at	Darc	5.82428	6.39726	6.39542	6.38826	7.10854	8.50451	-2.63166	Cluster 5	Duffy blood group, chemokine receptor
1423290_at	Hyou1	6.185	5.85249	6.14621	6.10121	7.3057	8.70565	-2.63891	Cluster 5	hypoxia up-regulated 1
1421381_a_at	Col9a1	6.14376	5.98186	6.447	6.02732	6.47843	7.88875	-2.65795	Cluster 5	collagen, type IX, alpha 1
1438708_x_at	Ywhab	6.99396	7.03624	7.00593	7.08245	8.04088	9.45564	-2.66615	Cluster 5	tyrosine 3-monooxygenase/tryptophan 5-monooxygenase activation protein, beta polypeptide
1437228_at	Fam71f1	6.51516	6.47164	6.64445	6.4917	7.05074	8.47625	-2.6861	Cluster 5	family with sequence similarity 71, member F1
1441252_at	2010001A14Rik	5.23087	5.4389	5.15669	5.10965	5.43942	6.87458	-2.70411	Cluster 5	RIKEN cDNA 2010001A14 gene
1454019_at	ENSMUSG00000038461	6.56197	6.58353	6.6036	6.40956	6.65727	8.11887	-2.75412	Cluster 5	hypothetical LOC100036523
1428701_at	Pvrl4	5.45118	5.24722	5.41645	5.38561	5.25071	6.74248	-2.81233	Cluster 5	poliovirus receptor-related 4
1452304_a_at	Arhgef5	5.88764	6.14682	5.83578	6.15414	5.97353	7.4841	-2.84923	Cluster 5	Rho guanine nucleotide exchange factor (GEF) 5
1447095_at	C86942	5.1257	5.2763	5.38321	5.1046	5.28911	6.88095	-3.01433	Cluster 5	expressed sequence C86942
1430728_at	Krtap5-5	5.71534	5.94762	5.95452	5.92737	6.17195	7.97752	-3.49568	Cluster 5	keratin associated protein 5-5
1431329_at	Nphp4	6.02439	6.03429	6.44478	6.04735	5.61651	6.6168	-2.0004	Cluster 6	nephronophthisis 4 (juvenile) homolog (human)
1449818_at	Abcb4	7.03629	7.23093	7.43361	7.17601	7.02266	8.02492	-2.00314	Cluster 6	ATP-binding cassette, sub-family B (MDR/TAP), member 4
1453609_s_at	Ccdc9	6.99897	7.31812	7.37129	7.76176	7.02569	8.03131	-2.00782	Cluster 6	coiled-coil domain containing 9
1431939_a_at	Mina	7.35195	7.15524	7.40129	7.50502	7.22134	8.22953	-2.01138	Cluster 6	myc induced nuclear antigen
1459571_at		7.31597	7.49611	6.54535	7.43621	7.01551	8.0423	-2.03748	Cluster 6	---
1445107_at	A530064N14Rik	5.13243	5.38477	5.44026	5.37077	4.93344	5.96521	-2.04454	Cluster 6	RIKEN cDNA A530064N14 gene
1451501_a_at	Ghr	5.46488	5.41671	5.09348	5.22314	5.11991	6.15391	-2.0477	Cluster 6	growth hormone receptor
1417467_a_at	Tada3l	8.11657	7.84795	8.19813	8.08542	7.37997	8.41526	-2.04953	Cluster 6	transcriptional adaptor 3
1443677_at	E030011O05Rik	5.49676	5.59622	5.74706	5.46962	5.4259	6.46399	-2.05351	Cluster 6	RIKEN cDNA E030011O05 gene
1428486_at	1700123L14Rik	4.74172	4.87983	4.83172	4.83328	4.60941	5.64857	-2.05504	Cluster 6	nucleoporin 50 pseudogene
1423386_at	Psmd9	8.28116	7.72462	8.15755	7.82555	7.38784	8.43481	-2.06619	Cluster 6	proteasome (prosome, macropain) 26S subunit, non-ATPase, 9
1435213_at	Nhlrc1	6.15827	6.06044	6.24552	6.11222	5.44975	6.49767	-2.06755	Cluster 6	NHL repeat containing 1
1424904_at	1300010F03Rik	7.40934	6.976	7.16831	6.87634	6.53284	7.58078	-2.06758	Cluster 6	RIKEN cDNA 1300010F03 gene
1420039_s_at	Cbx7	6.13824	5.74036	5.99523	5.9769	5.65222	6.70478	-2.0742	Cluster 6	chromobox homolog 7
1434740_at	Scarf2	5.81541	5.23475	4.91713	5.17624	5.18639	6.24531	-2.08336	Cluster 6	scavenger receptor class F, member 2
1445049_at	C80893	5.75054	5.77689	5.80851	5.76461	5.63503	6.69411	-2.0836	Cluster 6	expressed sequence C80893
1424684_at	Rab5c	6.78394	6.39372	6.54619	6.71118	6.33904	7.39895	-2.08481	Cluster 6	RAB5C, member RAS oncogene family
1428964_at	Slc25a18	5.61036	5.7217	5.6961	5.7217	5.14494	6.20702	-2.08794	Cluster 6	solute carrier family 25 (mitochondrial carrier), member 18
1424769_s_at	Cald1	6.98819	5.31841	4.82734	5.03381	5.09149	6.15756	-2.09372	Cluster 6	caldesmon 1
1449592_at	Tcf15	6.35237	6.41969	6.42616	6.68589	6.08888	7.15504	-2.09386	Cluster 6	transcription factor 15
1442099_at	Usp31	5.74192	5.74679	5.73472	5.46069	5.39554	6.46818	-2.10327	Cluster 6	ubiquitin specific peptidase 31
1449200_at	Nup155	7.27638	7.3693	7.48074	7.48135	7.11052	8.18463	-2.10543	Cluster 6	nucleoporin 155
1457416_at		5.95786	5.84689	5.80816	5.76634	5.59993	6.68166	-2.11657	Cluster 6	---
1420845_at	Mrps2	6.45	6.29132	6.326	6.4551	5.79883	6.88117	-2.11746	Cluster 6	mitochondrial ribosomal protein S2
1450754_at	Cacna2d2	6.41758	6.10636	6.45921	6.4114	6.15834	7.24319	-2.12116	Cluster 6	calcium channel, voltage-dependent, alpha 2/delta subunit 2
1446067_at		5.27927	5.44282	5.40331	5.47576	4.68957	5.78361	-2.1347	Cluster 6	---
1425081_at	Zfp286	5.48153	5.63049	5.65843	5.4947	5.32988	6.44667	-2.16863	Cluster 6	zinc finger protein 286
1457123_at	Nrg4	6.42014	5.54667	5.54676	5.49986	5.29413	6.41236	-2.17081	Cluster 6	neuregulin 4
1436784_x_at	Sf3b4	8.31563	8.39967	8.62937	8.40127	8.0158	9.15168	-2.19752	Cluster 6	splicing factor 3b, subunit 4
1418966_a_at	Dcbld1	5.35882	5.55191	5.48347	5.42075	5.27473	6.41208	-2.19977	Cluster 6	discoidin, CUB and LCCL domain containing 1
1420734_at	Ppp1r3f	6.9451	6.61058	6.55043	6.92582	6.19563	7.33437	-2.20188	Cluster 6	protein phosphatase 1, regulatory (inhibitor) subunit 3F
1438104_at		5.60153	5.55757	5.36671	5.31656	5.28374	6.42865	-2.21133	Cluster 6	---
1457784_at		6.83921	6.89643	6.71892	6.70859	6.36407	7.51422	-2.21938	Cluster 6	hypothetical LOC100503826
1419188_s_at	Ccl27a	6.12161	6.19233	6.04119	6.10121	5.69443	6.85607	-2.23712	Cluster 6	chemokine (C-C motif) ligand 27A /// chemokine (C-C motif) ligand 27b /// predicted gene 13306
1446418_at		6.20863	6.12406	6.28827	6.08163	5.97109	7.13992	-2.24828	Cluster 6	---
1444045_at		5.65003	5.25737	4.84944	5.31797	4.70596	5.87629	-2.25063	Cluster 6	---
1435957_at	B830032F12	5.11165	5.33562	5.21719	5.32847	4.98358	6.15468	-2.25182	Cluster 6	hypothetical protein B830032F12
1420807_a_at	Dlk2	7.06633	6.9451	7.0071	6.99046	6.39519	7.56658	-2.25229	Cluster 6	delta-like 2 homolog (Drosophila)
1438979_s_at	1700029I15Rik	6.29817	6.36156	6.14393	6.15192	6.06791	7.24876	-2.26712	Cluster 6	RIKEN cDNA 1700029I15 gene
1428065_at	Slc44a2	8.09913	8.03568	8.86602	9.13846	7.99155	9.17405	-2.2697	Cluster 6	solute carrier family 44, member 2
1428925_at	Senp1	7.03354	6.97079	7.32103	7.17112	6.91655	8.10103	-2.27282	Cluster 6	SUMO1/sentrin specific peptidase 1
1435269_at	N6amt2	6.31006	5.77492	6.3122	6.37729	5.90898	7.0978	-2.27966	Cluster 6	N-6 adenine-specific DNA methyltransferase 2 (putative)
1437367_at	Bat1a	5.9207	6.04508	5.80545	5.8202	5.52543	6.71843	-2.28627	Cluster 6	HLA-B-associated transcript 1A
1439373_x_at	Wnt5b	5.72744	5.83555	5.69177	5.176	5.41953	6.61336	-2.28759	Cluster 6	wingless-related MMTV integration site 5B
1419025_at	Sag	6.58983	6.13901	6.5263	6.28662	5.95678	7.161	-2.30413	Cluster 6	retinal S-antigen
1421763_at	Bmp10	5.34733	5.30533	5.40059	5.32735	4.86582	6.09944	-2.35156	Cluster 6	bone morphogenetic protein 10
1429356_s_at	Ggps1 /// LOC100045315	5.55956	5.52304	5.52211	5.68745	5.28523	6.51931	-2.35232	Cluster 6	geranylgeranyl diphosphate synthase 1
1423915_at	Olfml2b	6.38033	5.90426	6.29765	6.30916	5.55427	6.79845	-2.36883	Cluster 6	olfactomedin-like 2B
1431833_a_at	Hmgcs2	5.54761	5.47189	5.5638	5.46682	5.22368	6.4685	-2.36988	Cluster 6	3-hydroxy-3-methylglutaryl-Coenzyme A synthase 2
1448728_a_at	Nfkbiz	7.22348	7.99916	8.42024	8.57696	7.4783	8.72531	-2.3735	Cluster 6	nuclear factor of kappa light polypeptide gene enhancer in B-cells inhibitor, zeta
1453562_a_at	Nmral1	7.71356	7.40252	7.63057	7.43316	6.97504	8.22491	-2.3782	Cluster 6	NmrA-like family domain containing 1
1450108_at	Kif1a	6.12967	6.29923	6.46407	6.24182	5.5149	6.76582	-2.37993	Cluster 6	kinesin family member 1A
1422365_at	Olfr17	4.76582	4.4758	4.93953	4.84999	4.569	5.82592	-2.38984	Cluster 6	olfactory receptor 17
1425208_at	Lbh	6.39158	6.75388	6.30871	6.60895	5.97248	7.24372	-2.41368	Cluster 6	limb-bud and heart
1429099_at	Duxbl	5.18298	5.47794	5.3652	5.42649	5.09864	6.38559	-2.44011	Cluster 6	double homeobox B-like /// predicted gene 10394
1417014_at	Hspb8	5.73856	5.8686	5.93402	5.85992	5.31271	6.61315	-2.46305	Cluster 6	heat shock protein 8
1427381_at	Irg1	5.62252	5.60617	6.73787	6.98432	5.82494	7.14439	-2.49572	Cluster 6	immunoresponsive gene 1
1429437_at	Prpf40a	4.84614	5.00015	4.88561	5.24819	4.76385	6.10335	-2.53065	Cluster 6	PRP40 pre-mRNA processing factor 40 homolog A (yeast)
1429876_at	Supt7l	7.39257	7.27151	7.36571	7.36577	6.67449	8.05719	-2.60755	Cluster 6	suppressor of Ty 7 (S. cerevisiae)-like
1443976_at	Cdk5rap2	6.67699	6.74925	6.30039	6.52878	6.12916	7.54315	-2.66472	Cluster 6	CDK5 regulatory subunit associated protein 2
1443160_at	Sbf2	5.33342	5.07345	5.02605	4.99929	4.92334	6.36584	-2.71791	Cluster 6	SET binding factor 2
1418930_at	Cxcl10	7.43592	7.37512	9.00907	8.69046	7.75564	9.39287	-3.11068	Cluster 6	chemokine (C-X-C motif) ligand 10
1459056_at	Rasgrf1	6.16333	6.2394	6.07287	6.05049	5.80158	7.46253	-3.16224	Cluster 6	RAS protein-specific guanine nucleotide-releasing factor 1

## Sheet: Suppl. Table 4
KEGG pathway	KEGG pathway ID	Total number of genes in pathway	Number of genes found	% genes found	Bonferroni corrected term-enrichment p value
Lysosome	4142	123	29	23.5772	1.72715e-07
Chemokine signaling pathway	4062	185	29	15.6757	0.00167831
Peroxisome	4146	79	17	21.519	0.00175128
PPAR signaling pathway	3320	81	17	20.9877	0.00248294
Cytokine-cytokine receptor interaction	4060	248	34	13.7097	0.0056823
Fc gamma R-mediated phagocytosis	4666	92	17	18.4783	0.0136856
Toll-like receptor signaling pathway	4620	101	18	17.8218	0.0140793
Hematopoietic cell lineage	4640	84	16	19.0476	0.0149585
B cell receptor signaling pathway	4662	78	15	19.2308	0.021741
Phagosome	4145	177	25	14.1243	0.0364899
Focal adhesion	4510	199	27	13.5678	0.041057
Cellular component	GO ID	Total number of genes in category	Number of genes found	% genes found	Bonferroni corrected term-enrichment p value
cytoplasm	5737	2435	201	8.25462	1.73829e-07
external side of plasma membrane	9897	145	29	20	2.4416e-07
cell surface	9986	202	34	16.8317	1.13963e-06
plasma membrane	5886	1127	104	9.22804	4.92294e-05
plasma membrane part	44459	783	77	9.83397	0.000196893
cytoplasmic part	44444	1706	141	8.26495	0.000266531
lytic vacuole	323	57	11	19.2982	0.0284601
lysosome	5764	57	11	19.2982	0.0284601
basolateral plasma membrane	16323	79	13	16.4557	0.0440212
Biological process	GO ID	Total number of genes in category	Number of genes found	% genes found	Bonferroni corrected term-enrichment p value
regulation of response to stimulus	48583	1192	124	10.4027	1.68819e-11
positive regulation of biological process	48518	2158	188	8.71177	4.75784e-11
regulation of response to stress	80134	369	57	15.4472	7.95479e-11
regulation of immune system process	2682	454	64	14.0969	1.76097e-10
defense response	6952	425	59	13.8824	3.1086e-09
system development	48731	2403	197	8.19809	3.56301e-09
regulation of defense response	31347	196	37	18.8775	4.99681e-09
cell differentiation	30154	1822	159	8.72667	7.26392e-09
leukocyte activation	45321	414	57	13.7681	1.03034e-08
cellular response to chemical stimulus	70887	630	74	11.746	2.21162e-08
response to organic substance	10033	731	81	11.0807	4.60026e-08
regulation of metabolic process	19222	2469	195	7.89793	1.41607e-07
hemopoietic or lymphoid organ development	48534	469	59	12.58	1.79933e-07
hemopoiesis	30097	434	56	12.9032	2.01273e-07
response to other organism	51707	274	42	15.3285	2.02036e-07
lipid metabolic process	6629	486	60	12.3457	2.67457e-07
immune system development	2520	492	60	12.1951	4.35988e-07
negative regulation of biological process	48519	1930	158	8.18653	1.14291e-06
positive regulation of cellular process	48522	1955	159	8.13299	1.60806e-06
regulation of catalytic activity	50790	698	74	10.6017	2.42955e-06
lymphocyte activation	46649	367	48	13.079	2.58534e-06
positive regulation of immune system process	2684	277	40	14.4404	3.24519e-06
cellular lipid metabolic process	44255	353	46	13.0312	6.24121e-06
response to wounding	9611	355	46	12.9577	7.46378e-06
regulation of cell proliferation	42127	690	72	10.4348	7.91957e-06
phosphorus metabolic process	6793	863	84	9.73349	1.12238e-05
phosphate-containing compound metabolic process	6796	863	84	9.73349	1.12238e-05
regulation of multicellular organismal process	51239	1262	111	8.79556	1.30332e-05
cell migration	16477	515	58	11.2621	1.65518e-05
cell motility	48870	558	61	10.9319	2.12858e-05
regulation of inflammatory response	50727	117	23	19.6581	2.33375e-05
regulation of response to external stimulus	32101	218	33	15.1376	2.37593e-05
regulation of macromolecule metabolic process	60255	2113	164	7.76148	2.42713e-05
negative regulation of response to stimulus	48585	420	50	11.9048	2.805e-05
inflammatory response	6954	209	32	15.311	2.92562e-05
leukocyte differentiation	2521	288	39	13.5417	3.09949e-05
positive regulation of metabolic process	9893	1215	106	8.72428	4.43733e-05
negative regulation of cellular process	48523	1760	141	8.01136	4.49114e-05
nitric oxide biosynthetic process	6809	28	11	39.2857	5.49113e-05
nitric oxide metabolic process	46209	28	11	39.2857	5.49113e-05
phagocytosis	6909	62	16	25.8065	5.78259e-05
protein phosphorylation	6468	683	69	10.1025	5.93977e-05
phosphorylation	16310	734	72	9.80926	9.85059e-05
regulation of cytokine production	1817	234	33	14.1026	0.00013375
regulation of primary metabolic process	80090	2137	162	7.58072	0.000148596
cellular response to organic substance	71310	475	52	10.9474	0.00022712
positive regulation of defense response	31349	94	19	20.2128	0.000237075
positive regulation of cytokine production	1819	113	21	18.5841	0.000253699
regulation of cellular metabolic process	31323	2124	160	7.53296	0.000273495
organ development	48513	1899	146	7.68826	0.000316021
regulation of signal transduction	9966	889	81	9.11136	0.000351335
regulation of immune response	50776	244	33	13.5246	0.000359032
endocytosis	6897	177	27	15.2542	0.000369434
regulation of immune effector process	2697	136	23	16.9118	0.00041098
regulation of leukocyte activation	2694	224	31	13.8393	0.000482848
regulation of phosphorylation	42325	435	48	11.0345	0.000524362
regulation of nitric oxide biosynthetic process	45428	22	9	40.9091	0.000591316
positive regulation of macromolecule metabolic process	10604	1145	97	8.47162	0.000688533
T cell activation	42110	251	33	13.1474	0.000689761
tumor necrosis factor production	32640	49	13	26.5306	0.000695742
regulation of tumor necrosis factor production	32680	49	13	26.5306	0.000695742
regulation of cell activation	50865	240	32	13.3333	0.000739092
protein metabolic process	19538	1846	141	7.63814	0.000771993
tumor necrosis factor superfamily cytokine production	71706	50	13	26	0.000895956
negative regulation of immune system process	2683	132	22	16.6667	0.000937918
response to molecule of bacterial origin	2237	122	21	17.2131	0.000952199
regulation of developmental process	50793	1017	88	8.6529	0.000987561
response to bacterium	9617	186	27	14.5161	0.00100527
response to lipopolysaccharide	32496	104	19	18.2692	0.00121167
lymphocyte differentiation	30098	211	29	13.7441	0.00128461
brown fat cell differentiation	50873	30	10	33.3333	0.00130785
regulation of cell migration	30334	200	28	14	0.00133974
positive regulation of response to stimulus	48584	559	56	10.0179	0.00140255
interferon-gamma production	32609	60	14	23.3333	0.00143518
negative regulation of nitric oxide biosynthetic process	45019	6	5	83.3333	0.00179042
leukocyte migration	50900	97	18	18.5567	0.00180529
carboxylic acid metabolic process	19752	324	38	11.7284	0.00183755
oxoacid metabolic process	43436	324	38	11.7284	0.00183755
programmed cell death	12501	884	78	8.82353	0.00203401
negative regulation of cell proliferation	8285	288	35	12.1528	0.00205969
regulation of protein phosphorylation	1932	404	44	10.8911	0.00219391
regulation of phosphate metabolic process	19220	485	50	10.3093	0.00227389
regulation of phosphorus metabolic process	51174	485	50	10.3093	0.00227389
organic acid metabolic process	6082	327	38	11.6208	0.00229689
regulation of protein metabolic process	51246	769	70	9.10273	0.00235239
positive regulation of immune response	50778	174	25	14.3678	0.00299862
cellular ketone metabolic process	42180	344	39	11.3372	0.00311428
regulation of cellular process	50794	5011	318	6.34604	0.00313046
regulation of cell motility	2000145	210	28	13.3333	0.0035383
regulation of kinase activity	43549	283	34	12.0141	0.00369552
apoptotic process	6915	872	76	8.7156	0.00434351
myeloid cell differentiation	30099	189	26	13.7566	0.00435601
regulation of lymphocyte activation	51249	202	27	13.3663	0.00499408
regulation of protein modification process	31399	499	50	10.02	0.00508377
regulation of cellular component movement	51270	226	29	12.8319	0.0051598
regulation of multicellular organismal development	2000026	802	71	8.85287	0.00529911
fat cell differentiation	45444	126	20	15.873	0.00616006
regulation of signaling	23051	1020	85	8.33333	0.00674596
regulation of protein kinase activity	45859	266	32	12.0301	0.0068419
cellular component organization at cellular level	71842	1724	129	7.4826	0.00716905
regulation of interferon-gamma production	32649	51	12	23.5294	0.00719319
regulation of transferase activity	51338	292	34	11.6438	0.0073325
cellular protein modification process	6464	1353	106	7.83444	0.0075764
protein modification process	36211	1353	106	7.83444	0.0075764
activation of immune response	2253	108	18	16.6667	0.0087509
anatomical structure morphogenesis	9653	1503	115	7.65136	0.00892995
glycerolipid metabolic process	46486	120	19	15.8333	0.0107565
positive regulation of molecular function	44093	527	51	9.67742	0.0108391
regulation of localization	32879	716	64	8.93855	0.0114612
monocarboxylic acid metabolic process	32787	176	24	13.6364	0.0115737
regulation of cell death	10941	763	67	8.78113	0.0127555
immune response-regulating signaling pathway	2764	102	17	16.6667	0.0153152
positive regulation of catalytic activity	43085	409	42	10.2689	0.0157857
positive regulation of cellular metabolic process	31325	1139	91	7.98946	0.0167656
alcohol metabolic process	6066	124	19	15.3226	0.0173643
regulation of stress-activated MAPK cascade	32872	94	16	17.0213	0.0204822
regulation of stress-activated protein kinase signaling cascade	70302	94	16	17.0213	0.0204822
negative regulation of cell communication	10648	346	37	10.6936	0.0205289
positive regulation of cellular component movement	51272	115	18	15.6522	0.0212192
regulation of locomotion	40012	231	28	12.1212	0.0216434
regulation of cell differentiation	45595	718	63	8.77437	0.0236749
regulation of MAPK cascade	43408	208	26	12.5	0.0244837
regulation of programmed cell death	43067	749	65	8.67824	0.0247777
innate immune response	45087	128	19	14.8438	0.0273928
positive regulation of cell migration	30335	107	17	15.8879	0.0290541
positive regulation of multicellular organismal process	51240	299	33	11.0368	0.0298183
macromolecule modification	43412	1399	106	7.57684	0.0314412
vasculature development	1944	380	39	10.2632	0.0316104
homeostatic process	42592	710	62	8.73239	0.0316529
stress-activated MAPK cascade	51403	108	17	15.7407	0.0328471
fatty acid metabolic process	6631	130	19	14.6154	0.034126
regulation of apoptotic process	42981	742	64	8.62534	0.0343856
positive regulation of response to external stimulus	32103	78	14	17.9487	0.0355461
response to virus	9615	88	15	17.0455	0.035895
cellular biosynthetic process	44249	2070	146	7.05314	0.0370494
stress-activated protein kinase signaling cascade	31098	109	17	15.5963	0.0370719
negative regulation of signal transduction	9968	329	35	10.6383	0.0377011
cell projection organization	30030	538	50	9.29368	0.038256
positive regulation of cell motility	2000147	110	17	15.4545	0.0417705
negative regulation of signaling	23057	345	36	10.4348	0.044238
positive regulation of protein metabolic process	51247	414	41	9.90338	0.0456325
cellular macromolecule metabolic process	44260	3017	200	6.6291	0.0480603
leukocyte chemotaxis	30595	61	12	19.6721	0.0489571
Moecular function	GO ID	Total number of genes in category	Number of genes found	% genes found	Bonferroni corrected term-enrichment p value
nucleotide binding	16788	295	35	11.8644	0.000632778
magnesium ion binding	16628	10	5	50	0.00799909
regulatory region DNA binding	16298	40	9	22.5	0.0187489
sequence-specific DNA binding RNA polymerase II transcription factor activity	2020	12	5	41.6667	0.0229963
RNA polymerase II core promoter proximal region sequence-specific DNA binding transcription factor activity	16627	20	6	30	0.042667
RNA polymerase II regulatory region DNA binding	48029	20	6	30	0.042667

## Sheet: Suppl. Table 5
KEGG Pathway	KEGG pathway ID	Total number of genes in category	Number of genes found	% genes found	Bonferroni corrected term-enrichment p value
no significant entichment	-	-	-	-	-
Cellular component	GO ID	Total number of genes in category	Number of genes found	% genes found	Bonferroni corrected term-enrichment p value
external side of plasma membrane	9897	188	7	3.7234	0.000271214
cell surface	9986	329	10	3.03951	5.39595e-05
Biological process	GO ID	Total number of genes in category	Number of genes found	% genes found	Bonferroni corrected term-enrichment p value
regulation of cytoskeleton organization	51493	143	6	4.1958	0.00417327
B cell receptor signaling pathway	50853	20	3	15	0.00433039
regulation of microtubule cytoskeleton organization	70507	55	4	7.27273	0.00635935
regulation of microtubule-based process	32886	67	4	5.97015	0.0135377
cellular response to cytokine stimulus	71345	141	5	3.5461	0.0306179
regulation of B cell proliferation	30888	40	3	7.5	0.0344413
immune response-activating signal transduction	2757	94	4	4.25532	0.0476922
Moecular function	GO ID	Total number of genes in category	Number of genes found	% genes found	Bonferroni corrected term-enrichment p value
G-protein coupled receptor activity	4930	162	5	3.08642	0.0198738
guanyl ribonucleotide binding	32561	60	3	5	0.036571
guanyl nucleotide binding	19001	61	3	4.91803	0.0382927

## Sheet: Suppl. Table 6
KEGG Pathway	KEGG pathway ID	Total number of genes in category	Number of genes found	% genes found	Bonferroni corrected term-enrichment p value
no significant enrichment	-	-	-	-	-
Cellular component	GO ID	Total number of genes in category	Number of genes found	% genes found	Bonferroni corrected term-enrichment p value
intracellular	5622	5869	239	4.07224	5.00503e-11
intracellular part	44424	5799	236	4.06967	1.02434e-10
intracellular organelle	43229	4906	205	4.17856	2.20367e-09
intracellular membrane-bounded organelle	43231	4389	174	3.96446	2.41376e-05
intracellular organelle part	44446	2247	103	4.58389	4.28736e-05
cytoplasm	5737	4078	162	3.97254	8.24187e-05
nucleus	5634	2346	104	4.43308	0.000183832
cytoplasmic part	44444	3065	127	4.14356	0.000320632
intracellular non-membrane-bounded organelle	43232	1127	58	5.14641	0.000863324
Z disc	30018	54	8	14.8148	0.0118434
I band	31674	61	8	13.1148	0.0281095
cell cortex	5938	99	10	10.101	0.0460704
Biological process	GO ID	Total number of genes in category	Number of genes found	% genes found	Bonferroni corrected term-enrichment p value
negative regulation of biological process	48519	1930	102	5.28497	1.68145e-06
negative regulation of cellular process	48523	1760	91	5.17045	4.40263e-05
cellular macromolecule metabolic process	44260	3017	131	4.34206	0.000925481
regulation of metabolic process	19222	2469	112	4.53625	0.000930064
regulation of macromolecule metabolic process	60255	2113	99	4.68528	0.00112631
regulation of developmental process	50793	1017	57	5.60472	0.00161161
positive regulation of biological process	48518	2158	100	4.63392	0.00161574
regulation of cell differentiation	45595	718	42	5.84958	0.0133749
regulation of primary metabolic process	80090	2137	95	4.44548	0.017006
protein metabolic process	19538	1846	84	4.55038	0.0243376
cellular protein metabolic process	44267	1565	73	4.66454	0.0390158
cellular protein modification process	6464	1353	65	4.80414	0.0439715
protein modification process	36211	1353	65	4.80414	0.0439715
Moecular function	GO ID	Total number of genes in category	Number of genes found	% genes found	Bonferroni corrected term-enrichment p value
no significant enrichment	-	-	-	-	-
